# Supplementary material for: Histone gene replacement reveals a post-transcriptional role for H3K36 in maintaining metazoan transcriptome fidelity
Source: eLife journal article supplement (doi:10.7554/elife.23249), 2017-03-27
Supplement: supp [file elife-23249-supp-v1.zip]

Archive with 9 entries (9 files):
- elife_poa_e23249_Supplementary_File_2.docx
- elife_poa_e23249_'Figure_6_Supplement_1'.pdf
- elife_poa_e23249_'Figure_3_Supplement_1'.pdf
- elife_poa_e23249_'Figure_3_Supplement_2'.pdf
- elife_poa_e23249_Supplementary_File_1.xlsx
- elife_poa_e23249_'Figure_4_Supplement_1'.pdf
- elife_poa_e23249_'Figure_2_Supplement_1'.pdf
- elife_poa_e23249_Source_Code_2.pl
- elife_poa_e23249_Source_Code_1.pl
