# Supplementary material for: Histone gene replacement reveals a post-transcriptional role for H3K36 in maintaining metazoan transcriptome fidelity
Source: eLife journal article supplement (doi:10.7554/elife.23249), 2017-03-27
Supplement: supp [file elife-23249-supp-v1.zip › elife_poa_e23249_Supplementary_File_1.xlsx]

## Sheet: Table 1
Gene Name	Nuc mean counts	Nuc log2 fold change	Nuc standard error	Nuc stat	Nuc p-value	Nuc adj. p-value	PolyA mean counts	PolyA log2 fold change	PolyA standard error	PolyA stat	PolyA p-value	PolyA adj. p-value
128up	553.281	0.262584	0.0597211	4.39684	1.09836e-05	2.37084e-05	1063.99	-0.259281	0.0926303	-2.79909	0.00512466	0.0157074
14-3-3epsilon	7969.96	-0.245696	0.0189745	-12.9488	2.38769e-38	1.26182e-37	23548.9	-0.0452926	0.0761189	-0.595024	0.551827	0.677488
14-3-3zeta	12155.7	0.358086	0.016638	21.5222	9.64961e-103	9.54942e-102	25740.8	-0.317331	0.122561	-2.58917	0.00962083	0.0268545
140up	109.622	0.72815	0.1313	5.54568	2.92806e-08	7.34832e-08	274.11	0.0496092	0.161628	0.306933	0.758894	0.84183
18w	1678.88	-0.374005	0.0361731	-10.3393	4.67854e-25	1.97471e-24	786.456	0.461727	0.121701	3.79395	0.000148272	0.00073416
26-29-p	2607.49	-0.0705519	0.0285891	-2.46779	0.0135951	0.0214897	6824.21	-0.244014	0.0811994	-3.00512	0.00265473	0.00887861
2mit	413.393	-0.792755	0.069903	-11.3408	8.24031e-30	3.81342e-29	143.965	0.00666226	0.185114	0.0359899	0.97129	0.983707
312	121.434	0.352381	0.126882	2.77722	0.00548253	0.00914708	232.498	-0.0273569	0.143439	-0.190721	0.848744	0.904784
4EHP	997.961	0.530217	0.0439957	12.0516	1.903e-33	9.32691e-33	484.156	-0.383843	0.131696	-2.9146	0.0035614	0.0114577
5-HT1A	123.305	0.364405	0.124318	2.93123	0.00337621	0.00579993	21.0247	0.0724499	0.344079	0.210562	0.833229	0.895121
5-HT1B	40.4218	0.35574	0.211685	1.68052	0.0928567	0.126562	8.91165	0.984819	0.474422	2.07583	0.03791	0.0845025
5-HT2	52.2246	0.675724	0.195387	3.45838	0.000543429	0.00101503	24.3017	0.776896	0.387576	2.0045	0.0450164	0.097258
5-HT7	270.508	0.78421	0.0856828	9.15248	5.5642e-20	2.09754e-19	77.9504	0.0410879	0.257799	0.15938	0.87337	0.920513
5.8SrRNA:CR40454	0	NA	NA	NA	NA	NA	0	NA	NA	NA	NA	NA
5PtaseI	414.347	0.122769	0.0680675	1.80363	0.0712897	0.0992707	307.327	-0.0668534	0.151119	-0.442388	0.658208	0.764906
7B2	155.898	-0.197031	0.109019	-1.8073	0.0707147	0.0985825	320.669	-0.166679	0.187034	-0.891171	0.372838	0.511731
7SLRNA:CR32864	0	NA	NA	NA	NA	NA	0	NA	NA	NA	NA	NA
7SLRNA:CR42652	0	NA	NA	NA	NA	NA	0	NA	NA	NA	NA	NA
825-Oak	0	NA	NA	NA	NA	NA	0.861262	-0.228734	0.440195	-0.51962	0.603328	NA
A16	382.897	-0.388924	0.0708062	-5.4928	3.95603e-08	9.85817e-08	685.197	0.00297942	0.0962405	0.0309581	0.975303	0.986165
A2bp1	1856.92	-0.150634	0.0371867	-4.05075	5.1053e-05	0.000104642	937.432	0.141176	0.184702	0.764345	0.444662	0.580468
ABCB7	866.336	0.913809	0.0472432	19.3427	2.35007e-83	1.99008e-82	691.116	-0.588873	0.114635	-5.13694	2.79246e-07	3.41521e-06
ACC	11345.8	2.12834	0.0185728	114.595	0	0	966.809	-0.914078	0.159979	-5.71375	1.10515e-08	2.09541e-07
ACXA	45.4231	-0.488007	0.209852	-2.32548	0.0200465	0.0308315	150.452	1.14199	0.305461	3.73859	0.000185053	0.000891438
ACXB	13.0845	-1.06453	0.380826	-2.79533	0.00518472	0.00867281	37.3359	0.960397	0.367592	2.61267	0.00898389	0.0252638
ACXC	59.1763	-1.36266	0.190575	-7.15024	8.66271e-13	2.64707e-12	326.716	1.36359	0.240678	5.66563	1.46488e-08	2.67158e-07
ACXD	626.071	0.671179	0.0561874	11.9454	6.86563e-33	3.33095e-32	180.214	-0.951069	0.19556	-4.86332	1.15434e-06	1.13499e-05
ACXE	27.6048	-0.360385	0.255724	-1.40927	0.158755	0.205997	31.0674	0.392779	0.352527	1.11418	0.265202	0.397275
AGO1	6707.16	-0.113052	0.0192337	-5.8778	4.15761e-09	1.09364e-08	3472.72	0.222738	0.110309	2.01923	0.0434638	0.0945772
AGO2	5873.3	-0.369574	0.0236894	-15.6008	7.18724e-55	4.73941e-54	3462.21	-0.308757	0.123191	-2.50634	0.0121989	0.0326722
AGO3	45.5439	1.22647	0.225897	5.4293	5.65741e-08	1.39812e-07	96.7703	0.583314	0.225806	2.58325	0.00978739	0.0272278
AIF	759.555	0.480643	0.050997	9.42492	4.30422e-21	1.66651e-20	844.17	0.322825	0.155155	2.08066	0.0374647	0.0837752
ALiX	3018.48	-0.123103	0.026944	-4.56883	4.90459e-06	1.08338e-05	2748.32	-0.192516	0.160619	-1.19859	0.230688	0.356567
AP-1gamma	2511.55	0.483293	0.0288055	16.7778	3.54626e-63	2.57334e-62	964.106	-0.0020068	0.144858	-0.0138536	0.988947	0.993122
AP-1sigma	694.877	0.0267192	0.0526641	0.507351	0.611909	0.667758	1645.71	-0.0990665	0.109145	-0.90766	0.364058	0.503334
AP-2	178.647	-1.80986	0.120808	-14.9813	9.73163e-51	6.14583e-50	290.932	0.262593	0.145632	1.80313	0.0713683	0.141809
AP-2sigma	326.126	-0.21145	0.0770114	-2.7457	0.0060382	0.0100058	1383.87	0.0101757	0.126606	0.0803732	0.93594	0.961127
AP-47	951.948	-0.0559665	0.0482866	-1.15905	0.246437	0.30408	1570.39	-0.253244	0.0826448	-3.06424	0.00218222	0.00745875
AP-50	1202.76	-0.395376	0.0440984	-8.96577	3.0811e-19	1.1354e-18	1844.1	0.0912397	0.100226	0.910343	0.362642	0.501952
APC4	231.838	-0.093727	0.0926662	-1.01145	0.311802	0.373654	268.087	-0.118878	0.12684	-0.937234	0.348638	0.487451
APP-BP1	366.51	0.0718201	0.0714856	1.00468	0.315052	0.376856	681.212	0.454673	0.15221	2.98715	0.0028159	0.00934228
AQP	89.5781	2.03116	0.164253	12.3661	3.98787e-35	1.99899e-34	69.9564	-1.0822	0.264411	-4.09286	4.26092e-05	0.000251769
AR-2	231.066	0.0226792	0.0931767	0.2434	0.807695	0.842423	245.517	-0.0217385	0.17085	-0.127237	0.898753	0.937102
ARY	7.10659	-0.0254407	0.470498	-0.0540719	0.956878	0.966951	56.2514	0.768886	0.373629	2.05789	0.0396011	0.087582
ASPP	1139.1	-0.389817	0.0421756	-9.2427	2.4035e-20	9.14255e-20	272.879	0.454209	0.160806	2.82458	0.00473425	0.0147068
ATP7	2216.01	0.176031	0.0306761	5.73838	9.55858e-09	2.46749e-08	614.355	0.151016	0.267601	0.564332	0.572528	0.695556
ATPCL	7254.39	-0.381043	0.0189642	-20.0927	8.54899e-90	7.64913e-89	4748.55	-0.584498	0.0804832	-7.26235	3.80409e-13	1.90021e-11
ATPsyn-Cf6	1406.6	1.00637	0.0397387	25.3247	1.70853e-141	2.19512e-140	4705.37	-0.879394	0.161503	-5.44506	5.17875e-08	8.03159e-07
ATPsyn-b	3515.02	1.2058	0.02576	46.8092	0	0	4889.35	-1.14639	0.11151	-10.2806	8.61954e-25	1.88087e-22
ATPsyn-beta	25675.1	1.33345	0.0129889	102.661	0	0	29270.5	-1.12631	0.150373	-7.4901	6.88237e-14	3.90881e-12
ATPsyn-d	2435.35	1.01809	0.0306902	33.1731	2.62954e-241	5.36243e-240	5888.58	-0.959735	0.189497	-5.06466	4.09136e-07	4.68585e-06
ATPsyn-gamma	4953.03	1.1251	0.0229539	49.0154	0	0	6886.75	-1.03768	0.114433	-9.068	1.21218e-19	1.62119e-17
ATbp	94.033	-0.0276293	0.138332	-0.199733	0.84169	0.870327	114.664	0.0919647	0.187842	0.489585	0.624428	0.738958
Aac11	2726.77	0.537554	0.0298456	18.0112	1.59261e-72	1.24509e-71	2543.33	0.239153	0.0987033	2.42295	0.0153949	0.0398091
Aats-ala	3288.97	0.432529	0.0259785	16.6495	3.05153e-62	2.19068e-61	2291.99	-0.28512	0.107139	-2.66122	0.00778589	0.0224221
Aats-ala-m	486.718	0.61827	0.0615228	10.0494	9.23927e-24	3.79134e-23	383.545	-0.154191	0.124111	-1.24237	0.214102	0.335898
Aats-arg	960.952	0.33061	0.0450926	7.33179	2.27093e-13	7.05969e-13	1132.74	-0.410862	0.100757	-4.07777	4.54694e-05	0.00026589
Aats-asn	1659.31	0.180587	0.0348933	5.17541	2.27413e-07	5.4439e-07	2065.67	-0.456589	0.0778401	-5.86573	4.47166e-09	9.45892e-08
Aats-asp	3232.16	0.152911	0.0266215	5.74391	9.25177e-09	2.39013e-08	4683.83	-0.561344	0.103122	-5.44348	5.225e-08	8.07311e-07
Aats-cys	773.734	0.442836	0.0505619	8.75829	1.98233e-18	7.1576e-18	822.142	-0.425037	0.0972931	-4.36863	1.25031e-05	8.74162e-05
Aats-gln	1435.75	0.297012	0.0384278	7.72911	1.08305e-14	3.52167e-14	1173.43	-0.383899	0.123448	-3.10981	0.00187211	0.00654816
Aats-glupro	4880.85	0.811205	0.0222314	36.4891	1.6521e-291	3.97184e-290	1297.36	-0.396746	0.135563	-2.92665	0.00342636	0.011078
Aats-gly	1755.65	0.255772	0.0335092	7.63288	2.29564e-14	7.36832e-14	1992.38	-0.322351	0.0906132	-3.55744	0.000374487	0.00163034
Aats-his	1218.51	-0.174027	0.0402347	-4.32529	1.52329e-05	3.25305e-05	209.934	-0.500831	0.152136	-3.29199	0.000994822	0.00379093
Aats-ile	2706.9	0.404746	0.0291712	13.8748	9.00115e-44	5.15409e-43	1801.15	-0.410852	0.0947659	-4.33544	1.45467e-05	9.96318e-05
Aats-leu	446.36	0.719303	0.0654122	10.9965	3.97411e-28	1.77849e-27	265.221	-0.0167737	0.152096	-0.110284	0.912184	0.945085
Aats-lys	1578.93	0.232235	0.0364415	6.37282	1.85588e-10	5.2091e-10	1734.94	-0.422267	0.120244	-3.51175	0.000445172	0.00188463
Aats-met	140.539	0.186648	0.114	1.63727	0.101573	0.137287	132.64	-0.187344	0.217782	-0.860237	0.389659	0.528032
Aats-phe	398.481	0.483285	0.0704539	6.8596	6.90544e-12	2.04365e-11	713.011	-0.221212	0.127589	-1.73378	0.0829566	0.160269
Aats-pro	117.668	0.614873	0.129772	4.73811	2.15724e-06	4.86756e-06	132.075	-0.19238	0.180082	-1.06829	0.285391	0.419734
Aats-ser	350.386	-0.00558755	0.0747941	-0.0747057	0.940449	0.953	195.228	-0.1931	0.209051	-0.923696	0.355645	0.4948
Aats-thr	2292.6	0.286725	0.0305621	9.3817	6.49184e-21	2.50197e-20	1870.72	-0.565488	0.147654	-3.82981	0.000128243	0.000650258
Aats-trp	747.775	0.236335	0.0534095	4.42497	9.64564e-06	2.08976e-05	1276.52	-0.252978	0.0964383	-2.62321	0.00871064	0.0246178
Aats-tyr	1487.31	0.25617	0.0404581	6.33172	2.42442e-10	6.78081e-10	1923.55	-0.499276	0.0822289	-6.07178	1.26497e-09	3.04918e-08
Aats-val	1844.63	0.64053	0.0349964	18.3028	7.8669e-75	6.26694e-74	575.863	-0.505466	0.155209	-3.25668	0.00112723	0.00422812
Abd-B	536.473	-0.0873928	0.0653556	-1.33719	0.181161	0.231758	332.313	0.237345	0.149257	1.59018	0.111794	0.203508
Abi	1185.14	0.134662	0.0404826	3.32642	0.000879696	0.00161044	804.6	0.112481	0.124956	0.900161	0.368034	0.507158
Abl	1980.69	-0.207657	0.0334286	-6.21197	5.23228e-10	1.43973e-09	205.545	0.352301	0.235305	1.49721	0.134338	0.235604
Ac13E	2082.54	0.300845	0.0312424	9.6294	6.00812e-22	2.379e-21	567.111	0.309201	0.147365	2.09819	0.0358882	0.0809828
Ac3	412.364	1.03408	0.0686428	15.0646	2.7674e-51	1.76178e-50	180.103	0.524147	0.171355	3.05884	0.00222192	0.00758197
Ac76E	2809.48	1.83138	0.0302542	60.5331	0	0	484.929	-0.692572	0.199935	-3.46398	0.000532242	0.00219497
Ac78C	710.236	1.07866	0.0541433	19.9224	2.60274e-88	2.29968e-87	109.386	0.228556	0.202175	1.13048	0.258273	0.389476
AcCoAS	4460.56	0.884034	0.0236341	37.405	3.2438e-306	8.35122e-305	4013.19	-1.30547	0.158502	-8.2363	1.77611e-16	1.49265e-14
Acam	0.150622	0.502817	0.581363	0.864893	0.387097	NA	0	NA	NA	NA	NA	NA
Ace	1100.18	0.0600936	0.0417143	1.4406	0.149697	0.195471	551.853	0.299261	0.120805	2.47723	0.0132408	0.0350626
Acer	1063.88	1.55051	0.047107	32.9147	1.3556e-237	2.73132e-236	1007.6	-0.746008	0.129551	-5.7584	8.49161e-09	1.67118e-07
Acf1	1488.13	-0.103971	0.0369956	-2.81037	0.00494853	0.00830667	851.403	0.0184297	0.106332	0.173322	0.862398	0.913718
Ack	947.248	-0.395494	0.0462453	-8.55209	1.20879e-17	4.27724e-17	395.56	0.200086	0.202467	0.988238	0.323036	0.460982
Ack-like	1853.83	-0.555015	0.0346448	-16.0202	9.23864e-58	6.30885e-57	1187.41	0.238889	0.110876	2.15456	0.0311961	0.0718065
Acn	2141.03	0.305159	0.0313646	9.72942	2.25887e-22	9.03749e-22	877.061	0.0557291	0.180016	0.309578	0.756882	0.840484
Acon	14513	1.50309	0.015505	96.9423	0	0	8149.32	-0.774993	0.129863	-5.96777	2.40521e-09	5.42941e-08
Acox57D-d	480.337	1.29491	0.0654639	19.7806	4.37395e-87	3.81203e-86	573.534	-1.90556	0.261518	-7.28653	3.18041e-13	1.6279e-11
Acox57D-p	666.559	0.448788	0.0542894	8.26658	1.37858e-16	4.72862e-16	913.859	-0.779927	0.142632	-5.4681	4.54894e-08	7.15293e-07
Acp1	92.8139	4.18637	0.235982	17.7402	2.05287e-70	1.58646e-69	76.2935	-1.11857	0.399489	-2.79999	0.00511038	0.0156752
Acp24A4	7.34984	-1.48824	0.501138	-2.96973	0.00298061	0.005146	15.6209	-0.97481	0.472422	-2.06343	0.0390719	0.0867195
Acp26Aa	0.104231	-0.313478	0.537925	-0.582754	0.560059	NA	0.245484	0.235991	0.312042	0.756278	0.449482	NA
Acp26Ab	0	NA	NA	NA	NA	NA	0	NA	NA	NA	NA	NA
Acp29AB	0	NA	NA	NA	NA	NA	0.366674	0.321336	0.354161	0.907318	0.364239	NA
Acp32CD	1.5786	-0.899755	0.776694	-1.15844	0.246683	0.30434	3.37314	1.57779	0.566738	2.78399	0.00536946	0.0163289
Acp36DE	5.67466	-0.595074	0.527787	-1.12749	0.259536	0.318094	27.6326	0.313127	0.330535	0.947334	0.343468	0.482773
Acp53C14a	4.58315	0.204863	0.54602	0.375193	0.707517	0.754808	0.205259	-0.179958	0.261374	-0.688509	0.491133	NA
Acp53C14b	7.85307	0.506308	0.457655	1.10631	0.268593	0.327819	0.187776	-0.176748	0.259051	-0.682291	0.495055	NA
Acp53C14c	13.1745	0.605742	0.359665	1.68418	0.0921462	0.125663	0.175157	0.151883	0.256617	0.591866	0.55394	NA
Acp53Ea	7.56019	-0.0813717	0.460114	-0.176851	0.859626	0.885725	0	NA	NA	NA	NA	NA
Acp54A1	0	NA	NA	NA	NA	NA	0	NA	NA	NA	NA	NA
Acp62F	0.148648	0.498865	0.579599	0.860708	0.389399	NA	1.17661	-0.0137711	0.532054	-0.0258828	0.979351	NA
Acp63F	6.77622	-4.11655	0.732787	-5.61767	1.93548e-08	4.91329e-08	13.7952	0.258073	0.415749	0.620742	0.534769	0.662034
Acp65Aa	10.2172	0.642385	0.401321	1.60068	0.109448	0.146896	24.2713	-0.848998	0.556129	-1.52662	0.126855	0.22489
Acp70A	0	NA	NA	NA	NA	NA	0	NA	NA	NA	NA	NA
Acp76A	0.353077	-0.156505	0.753763	-0.207632	0.835516	NA	0.396143	-0.37344	0.358003	-1.04312	0.296892	NA
Acp95EF	0.501176	0.184491	0.803249	0.22968	0.81834	NA	5.57534	0.39313	0.556927	0.705892	0.480256	0.61417
Acp98AB	0.140458	0.481898	0.571887	0.842645	0.399427	NA	0	NA	NA	NA	NA	NA
Acph-1	643.063	-0.33738	0.0565313	-5.96802	2.40155e-09	6.38972e-09	1382.32	-0.119893	0.111176	-1.07841	0.280851	0.415021
Acsl	5561.74	1.36679	0.0223644	61.1148	0	0	2886.79	-0.762882	0.102818	-7.41976	1.17335e-13	6.48625e-12
Act42A	7061.7	-1.04316	0.0196925	-52.9724	0	0	16390.5	-0.0561799	0.0958606	-0.586059	0.557836	0.682641
Act57B	117077	1.62148	0.0111637	145.246	0	0	155891	-1.03996	0.27187	-3.82522	0.000130656	0.000660339
Act5C	50943.8	-0.306661	0.0126394	-24.2622	4.91116e-130	5.89821e-129	93913.5	-0.0186783	0.10407	-0.179477	0.857563	0.910886
Act79B	17.4843	2.112	0.360076	5.86543	4.47975e-09	1.177e-08	11.5551	0.207003	0.442685	0.467608	0.640065	0.751232
Act87E	9689.45	1.99438	0.0193922	102.845	0	0	13138.5	0.0789692	0.245121	0.322164	0.747329	0.833657
Act88F	0.728834	1.74624	0.808902	2.15878	0.0308673	0.0460303	1.02659	0.801922	0.488932	1.64015	0.100974	NA
Actbeta	188.751	-0.338626	0.101082	-3.35002	0.000808048	0.00148494	155.836	0.48489	0.180114	2.69213	0.00709963	0.0207046
Actn	21396	1.71023	0.0153727	111.251	0	0	4386.19	-0.96068	0.187196	-5.13193	2.86779e-07	3.49017e-06
Actn3	34.5865	-0.81704	0.232521	-3.51383	0.000441689	0.000832753	252.72	1.23322	0.236066	5.22402	1.7508e-07	2.29505e-06
Acyp	1.18743	-0.472477	0.789	-0.59883	0.549286	0.609567	11.6367	1.42494	0.49438	2.88227	0.00394819	0.0125275
Acyp2	81.1194	-0.0920135	0.150063	-0.613165	0.539767	0.601299	527.728	-0.0521327	0.14067	-0.370603	0.710934	0.805709
Ada	42.3353	-0.773868	0.221322	-3.49657	0.000471287	0.000886194	100.488	-0.75138	0.189392	-3.96733	7.26831e-05	0.000397902
Ada1-1	12.8845	-0.772533	0.370209	-2.08675	0.0369107	0.0542598	46.6483	-0.0745253	0.269701	-0.276325	0.782298	0.859983
Ada1-2	73.7457	-0.194169	0.157344	-1.23405	0.217185	0.272265	156.323	-0.115216	0.195158	-0.590373	0.554941	0.680035
Ada2a	299.575	0.461397	0.0787257	5.86082	4.60596e-09	1.20921e-08	174.397	0.18786	0.158129	1.18802	0.234827	0.361438
Ada2b	792.127	-0.067061	0.0505406	-1.32688	0.18455	0.23565	855.464	0.0749973	0.114696	0.65388	0.513189	0.642675
Adam	1490.01	0.527782	0.0374757	14.0833	4.80918e-45	2.80028e-44	3087.52	-0.318549	0.124868	-2.55109	0.0107388	0.0294854
Adar	1552.93	-0.170178	0.0387768	-4.38866	1.14053e-05	2.4591e-05	934.306	0.0336161	0.121001	0.277816	0.781154	0.859499
Adf1	628.402	-0.339423	0.0563226	-6.0264	1.67647e-09	4.49703e-09	1348.62	0.122641	0.149691	0.819292	0.41262	0.550307
Adgf-A	769.576	1.07582	0.0515511	20.8689	1.0264e-96	9.65947e-96	565.554	0.201894	0.241331	0.836586	0.402825	0.541171
Adgf-B	6.11884	-1.9689	0.565452	-3.48199	0.000497696	0.000932331	39.6203	1.18274	0.412279	2.86878	0.00412062	0.0130016
Adgf-C	80.8043	0.977245	0.163801	5.96603	2.43089e-09	6.4601e-09	40.0943	-0.870849	0.290097	-3.00192	0.00268283	0.00896535
Adgf-D	176.884	-1.48514	0.114023	-13.0249	8.83088e-39	4.70013e-38	553.092	-0.419568	0.151801	-2.76394	0.00571085	0.0172198
Adgf-E	18.1802	-1.51639	0.3486	-4.34994	1.36173e-05	2.9173e-05	107.825	1.22988	0.307065	4.00528	6.19439e-05	0.000346429
Adh	55.5975	-0.49544	0.187473	-2.64273	0.00822403	0.0134195	44.8062	-0.812812	0.361059	-2.25119	0.0243737	0.0584444
Adhr	0	NA	NA	NA	NA	NA	0	NA	NA	NA	NA	NA
Adk1	497.123	0.678079	0.0628869	10.7825	4.16349e-27	1.83033e-26	666.823	0.139468	0.125299	1.11308	0.265675	0.397609
Adk2	1643.02	1.01615	0.0356669	28.4899	1.56427e-178	2.54815e-177	2508.12	-0.886766	0.11053	-8.02285	1.03316e-15	7.78817e-14
Adk3	532.235	0.915425	0.0608567	15.0423	3.8782e-51	2.46193e-50	1584.16	-0.7253	0.106063	-6.83838	8.0093e-12	3.12287e-10
AdoR	286.216	0.536781	0.0866202	6.19695	5.75673e-10	1.58178e-09	100.916	-0.728732	0.211715	-3.44204	0.000577352	0.00235523
Ady43A	1076.8	0.203062	0.0420744	4.82625	1.39125e-06	3.18572e-06	759.784	-0.131506	0.248905	-0.528339	0.597264	0.71716
Aef1	768.902	0.227308	0.0517954	4.38858	1.14092e-05	2.45955e-05	730.515	-0.0860896	0.109349	-0.787291	0.431111	0.567725
Afti	1212.14	0.115678	0.0412938	2.80133	0.00508929	0.00852804	470.265	0.298892	0.125195	2.38741	0.0169675	0.0431579
Ag5r	1228.96	-0.0486018	0.0426042	-1.14077	0.253964	0.312262	3367.49	-0.688471	0.152088	-4.5268	5.98849e-06	4.6437e-05
Ag5r2	5600.55	0.298707	0.0237657	12.5688	3.13332e-36	1.59805e-35	26380.2	-1.39974	0.244136	-5.73342	9.84245e-09	1.88629e-07
Ahcy13	1440.21	0.38416	0.0370024	10.382	2.99335e-25	1.26861e-24	2903.97	-0.65342	0.144665	-4.51678	6.27884e-06	4.8297e-05
Ahcy89E	1148.91	-0.43747	0.0415094	-10.5391	5.70702e-26	2.45665e-25	1690.17	-0.186225	0.140577	-1.32472	0.185264	0.301324
Ak6	60.0375	0.215463	0.177369	1.21477	0.224452	0.280336	230.787	-0.0639205	0.199184	-0.320912	0.748277	0.834341
Akap200	4538.61	-1.1817	0.0245687	-48.0979	0	0	6474.08	0.501296	0.130501	3.84131	0.000122378	0.000624083
Akh	24.3253	0.548811	0.268887	2.04105	0.0412461	0.0601461	81.0356	-0.245938	0.207805	-1.1835	0.236609	0.363417
Akt1	2069.6	-0.378138	0.0319466	-11.8365	2.52656e-32	1.21483e-31	2229.31	0.162697	0.0755697	2.15294	0.0313232	0.0720678
AlCR2	115.058	-0.241972	0.132319	-1.8287	0.0674442	0.0944345	85.7193	-0.0352989	0.230183	-0.153351	0.878121	0.923174
Alas	1074.69	0.703153	0.0434096	16.1981	5.20219e-59	3.60186e-58	521.85	-0.711381	0.177478	-4.00827	6.1165e-05	0.000342689
Ald	23612.5	1.52594	0.0147134	103.711	0	0	23837.7	-1.21292	0.202265	-5.99667	2.01406e-09	4.63905e-08
Aldh	7611.8	2.16894	0.0208494	104.029	0	0	6379.84	-0.85848	0.198798	-4.31835	1.57198e-05	0.000106436
Aldh-III	3219.28	0.149613	0.0261662	5.71779	1.07921e-08	2.77739e-08	3817.47	-0.550163	0.129646	-4.24359	2.19971e-05	0.0001425
Alg-2	861.782	0.124057	0.0480545	2.58159	0.00983473	0.0158838	1972.62	-0.411746	0.0999797	-4.1183	3.81683e-05	0.000229342
Alg10	251.89	-0.17757	0.0883006	-2.01097	0.0443282	0.0643125	492.584	-0.201963	0.102934	-1.96205	0.0497562	0.106007
Alh	2285.87	-0.568	0.0306229	-18.5482	8.43099e-77	6.82966e-76	657.211	0.377333	0.159392	2.36733	0.017917	0.0452031
Alk	1068.21	0.0226596	0.0427284	0.530317	0.595892	0.652133	323.105	0.465493	0.126888	3.66854	0.000243936	0.00113043
AlkB	104.497	0.589448	0.131957	4.46697	7.93357e-06	1.72775e-05	272.682	0.190438	0.178411	1.06741	0.285786	0.420068
Alr	166.042	0.620409	0.105282	5.89284	3.79608e-09	1.00011e-08	312.716	-0.0347893	0.15377	-0.226243	0.821013	0.886437
AlstR	12.8228	-0.426156	0.370732	-1.1495	0.25035	0.308467	11.4332	0.0398605	0.456948	0.0872321	0.930487	0.957587
Ama	898.8	-2.96966	0.0654003	-45.4075	0	0	3297.4	1.46877	0.223459	6.57289	4.93478e-11	1.68623e-09
Amph	2884.68	1.71225	0.0298905	57.2841	0	0	1810.04	-0.562259	0.17263	-3.25702	0.0011259	0.00422442
Amun	2454.79	-0.165232	0.0293313	-5.63328	1.76811e-08	4.49947e-08	1644.29	0.0157722	0.17386	0.0907179	0.927717	0.955764
Amy-d	139.099	-1.84077	0.135728	-13.5622	6.70485e-42	3.74352e-41	2378.24	1.03974	0.293745	3.53962	0.000400704	0.00172575
Amy-p	142.511	-2.24361	0.141572	-15.8479	1.45415e-56	9.78582e-56	1709.33	1.20723	0.252123	4.78827	1.68225e-06	1.56382e-05
Amyrel	30.1182	-2.7341	0.326296	-8.3792	5.32889e-17	1.8467e-16	85.8805	1.92684	0.340568	5.65774	1.53382e-08	2.77696e-07
Ance	6455.54	-0.736025	0.0200756	-36.6626	2.88018e-294	6.99942e-293	11192.8	0.0678149	0.123513	0.549052	0.58297	0.704526
Ance-2	9.83056	0.938946	0.414097	2.26746	0.0233624	0.0355568	4.71417	-1.05923	0.545094	-1.94321	0.0519912	0.109884
Ance-3	167.284	1.45492	0.110373	13.1818	1.11674e-39	6.01517e-39	92.1234	-1.02701	0.215336	-4.76932	1.84845e-06	1.69927e-05
Ance-4	887.45	-0.820589	0.0504356	-16.27	1.6104e-59	1.12369e-58	1004.56	-0.665156	0.16462	-4.04055	5.3326e-05	0.000304811
Ance-5	952.944	0.705732	0.0472824	14.9259	2.23587e-50	1.40607e-49	630.732	-0.392727	0.172729	-2.27366	0.0229866	0.0556455
Andorra	1.25284	0.300805	0.782034	0.384645	0.7005	0.749063	21.1749	1.52569	0.431437	3.53629	0.000405792	0.00174343
Ank	12377.9	0.262127	0.0208624	12.5646	3.30658e-36	1.68386e-35	6025.12	-0.355667	0.0974044	-3.65144	0.000260771	0.00119729
Ank2	6362.3	-0.0684273	0.0196195	-3.48772	0.000487159	0.000913865	1004.28	0.0930908	0.0933581	0.997136	0.318698	0.455996
AnnIX	6154.3	0.34034	0.0206252	16.5012	3.5956e-61	2.55533e-60	7708.3	-0.480761	0.130391	-3.68708	0.000226838	0.00106428
AnnX	558.77	-0.83815	0.061496	-13.6293	2.67966e-42	1.50867e-41	138.08	-0.030126	0.205621	-0.146512	0.883517	0.927044
Anp	0	NA	NA	NA	NA	NA	0	NA	NA	NA	NA	NA
Ant2	112.012	0.369245	0.129669	2.8476	0.00440497	0.00744446	342.701	0.759147	0.270235	2.80921	0.00496631	0.0153126
Antp	1559.35	0.280447	0.0377616	7.42679	1.11264e-13	3.49282e-13	403.26	-0.107458	0.119577	-0.898649	0.36884	0.507762
Anxb11	1239.11	0.143102	0.0417418	3.42825	0.000607475	0.00113041	2179.75	-0.159743	0.0873834	-1.82807	0.0675388	0.135689
Aos1	598.869	-0.491698	0.0576081	-8.53522	1.39887e-17	4.93552e-17	1671.33	-0.135303	0.0961166	-1.40769	0.159221	0.268747
Apc	3132.78	-0.0443875	0.0262119	-1.69341	0.0903775	0.123559	641.246	-0.0287807	0.128417	-0.224118	0.822665	0.887528
Apc10	95.0511	-0.0373481	0.14389	-0.25956	0.795203	0.830877	278.583	-0.0388248	0.147712	-0.262841	0.792673	0.86713
Apc2	443.668	-0.372294	0.0696723	-5.34349	9.11725e-08	2.22654e-07	362.986	-0.151745	0.133366	-1.1378	0.255203	0.385828
Apc7	28.7435	0.42084	0.253419	1.66065	0.0967838	0.131382	14.4813	0.29017	0.395062	0.734492	0.462649	0.597925
ApepP	1412.89	-0.724907	0.0390227	-18.5765	4.97638e-77	4.03363e-76	1617.28	-1.0193	0.119887	-8.50215	1.86111e-17	1.83718e-15
Apf	121.616	0.700285	0.122581	5.71283	1.11113e-08	2.85625e-08	331.9	-0.0367889	0.193447	-0.190175	0.849172	0.905133
Aph-4	2571.07	0.971374	0.0298148	32.5803	7.81101e-233	1.55055e-231	1170.87	-0.398482	0.164865	-2.41702	0.0156483	0.0403805
Aplip1	180.415	-0.53526	0.103006	-5.19637	2.03214e-07	4.87243e-07	162.722	0.173716	0.225775	0.76942	0.441644	0.577438
Appl	1083.29	-0.486712	0.0462065	-10.5334	6.05906e-26	2.60652e-25	422.212	0.315052	0.184721	1.70556	0.0880904	0.168073
Aprt	101.207	0.269581	0.138196	1.95071	0.0510913	0.0732156	364.219	-0.833437	0.123325	-6.75804	1.39867e-11	5.27171e-10
Aps	2481.46	-0.19238	0.0299787	-6.4172	1.38801e-10	3.92127e-10	4435.32	0.0855604	0.0813705	1.05149	0.293033	0.427486
Arc1	5396.54	0.136696	0.0221612	6.16827	6.90429e-10	1.88821e-09	36137.4	0.375734	0.278769	1.34783	0.177712	0.291836
Arc2	132.486	0.572933	0.123784	4.62848	3.68365e-06	8.19477e-06	346.438	-0.222763	0.206219	-1.08022	0.280043	0.414269
Arc42	383.82	-0.714533	0.0726097	-9.84074	7.51529e-23	3.03297e-22	636.755	-0.804887	0.196146	-4.10352	4.06917e-05	0.000242512
Arf102F	665.492	0.0930154	0.0554917	1.67621	0.0936979	0.127605	3334.67	-0.263968	0.126307	-2.08989	0.0366274	0.0823818
Arf51F	982.861	0.238455	0.0443336	5.37866	7.50438e-08	1.84212e-07	2500.12	0.0456895	0.0965028	0.473452	0.63589	0.748358
Arf72A	451.046	0.125804	0.0657082	1.91459	0.0555449	0.0790918	1341.65	-0.339103	0.107887	-3.14312	0.00167157	0.0059386
Arf79F	6163.79	0.0566073	0.0195682	2.89282	0.00381801	0.0065098	15213.8	-0.232947	0.0932588	-2.49785	0.0124949	0.0333286
Arf84F	94.6949	-0.259508	0.145178	-1.78752	0.0738535	0.102607	326.502	0.0698782	0.134064	0.521231	0.602206	0.720977
ArfGAP3	1555.32	0.228492	0.035746	6.39209	1.63633e-10	4.60439e-10	1590.61	-0.355348	0.127568	-2.78556	0.00534357	0.0162621
Argk	55437.5	0.85493	0.0135092	63.2851	0	0	38162.4	-1.08917	0.181155	-6.01238	1.82824e-09	4.25836e-08
Ark	1504.12	-1.06772	0.038692	-27.5953	1.26818e-167	1.91066e-166	968.344	0.643848	0.124986	5.15134	2.58625e-07	3.22e-06
Arp1	1486.09	-0.0133556	0.0363514	-0.367401	0.71332	0.759973	2944.74	-0.402816	0.0770427	-5.22847	1.70916e-07	2.25435e-06
Arp10	367.335	0.204421	0.0735793	2.77824	0.00546546	0.00911973	410.73	-0.241331	0.143958	-1.67639	0.0936614	0.176509
Arp2	2439.71	0.0178368	0.0298207	0.598134	0.549751	0.609889	2671.54	-0.0369497	0.0751256	-0.491838	0.622834	0.737791
Arp3	1683.86	-0.0222668	0.0343546	-0.648148	0.516889	0.579791	2452.49	-0.198401	0.10999	-1.80381	0.0712607	0.141634
Arp5	277.487	0.0765498	0.0824936	0.927948	0.353434	0.417308	314.901	0.0760068	0.18436	0.412273	0.68014	0.782803
Arp53D	47.3404	-1.12093	0.206459	-5.42932	5.65699e-08	1.39812e-07	358.133	1.00967	0.274796	3.67427	0.000238528	0.00111075
Arp6	526.125	-0.256594	0.0598551	-4.28692	1.81164e-05	3.84987e-05	758.604	-0.224634	0.137534	-1.6333	0.102406	0.189683
Arp8	232.687	-0.11003	0.0927224	-1.18666	0.23536	0.292276	38.7644	0.0938068	0.282237	0.332369	0.739611	0.827422
Arpc1	3004	0.018904	0.0271669	0.695845	0.486526	0.550207	2412.37	-0.505511	0.25638	-1.97173	0.0486407	0.103933
Arpc2	2111.51	0.141709	0.0340233	4.16505	3.11279e-05	6.49476e-05	3342.12	-0.10178	0.104437	-0.974566	0.329775	0.468076
Arpc3A	219.032	-0.230925	0.0926116	-2.49348	0.0126498	0.020078	992.609	-0.221256	0.0928714	-2.3824	0.0172004	0.0436788
Arpc3B	200.48	0.164767	0.0997134	1.65241	0.0984514	0.13343	716.633	0.0884257	0.148141	0.596904	0.550571	0.676484
Arpc4	380.126	0.000690322	0.0701142	0.00984568	0.992144	0.993475	1221.96	-0.370715	0.0829462	-4.46935	7.84575e-06	5.86099e-05
Arpc5	439.98	-0.148047	0.0702632	-2.10704	0.0351145	0.0518519	1372.35	-0.0750963	0.0961134	-0.78133	0.434608	0.570638
Arr1	57.3412	-0.209213	0.183878	-1.13778	0.255212	0.313452	85.8744	-0.351383	0.235372	-1.49289	0.135467	0.237149
Arr2	7.82491	0.22564	0.479583	0.470491	0.638004	0.691742	8.88099	0.430559	0.459094	0.937846	0.348324	0.487285
Ars2	2775.96	0.568058	0.0292033	19.4518	2.81221e-84	2.41028e-83	962.842	0.0826088	0.160346	0.51519	0.60642	0.724535
Art1	1008.5	-0.721958	0.045732	-15.7867	3.84018e-56	2.57141e-55	1827.28	-0.210793	0.131049	-1.6085	0.107726	0.197586
Art2	17.9516	-0.288812	0.319292	-0.904539	0.36571	0.429688	40.4173	0.566818	0.290455	1.95149	0.0509993	0.108174
Art3	297.996	0.0433997	0.0801399	0.54155	0.588129	0.645266	543.01	-0.0716226	0.116086	-0.61698	0.537248	0.663979
Art4	916.753	-0.61501	0.0471186	-13.0524	6.16039e-39	3.29314e-38	1169.99	-0.238582	0.104459	-2.28398	0.0223725	0.0543706
Art6	8.99321	-0.333761	0.438959	-0.760345	0.447048	0.510918	28.3097	0.346993	0.356532	0.973245	0.330431	0.468592
Art7	287.149	-0.168169	0.0832358	-2.02039	0.0433428	0.0629712	103.691	-0.435199	0.275598	-1.57911	0.114311	0.20689
Art8	106.508	-0.388171	0.134548	-2.885	0.00391414	0.00666186	213.687	-0.306572	0.15525	-1.9747	0.0483022	0.103315
Art9	3.98508	0.0876134	0.597995	0.146512	0.883517	0.906727	12.8595	0.175998	0.446683	0.394011	0.693573	0.792527
Asap1	2202.27	0.290163	0.0307691	9.43033	4.08811e-21	1.5842e-20	857.937	-0.402843	0.193263	-2.08443	0.0371212	0.0832624
Asator	2252.77	1.0619	0.0316968	33.5018	4.53329e-246	9.41622e-245	886.204	-0.0232882	0.139954	-0.166399	0.867843	0.917253
Asph	2768.24	1.36317	0.0295674	46.1038	0	0	1098.45	0.477782	0.172058	2.77687	0.00548846	0.0166501
Ast	85.7497	0.679847	0.147408	4.612	3.98812e-06	8.85598e-06	265.324	-0.359144	0.139056	-2.58273	0.00980209	0.0272565
Ast-C	48.5493	0.501809	0.194414	2.58113	0.00984775	0.0159029	128.711	-0.306475	0.269945	-1.13533	0.256238	0.386937
Ast-CC	6.32343	-1.08711	0.510988	-2.12747	0.0333814	0.0494667	23.6455	-0.074985	0.391185	-0.191687	0.847987	0.904119
Asx	2035.39	0.148045	0.0329303	4.49571	6.93386e-06	1.51519e-05	587.805	0.326433	0.106852	3.05499	0.00225066	0.00767162
Atac1	120.949	-0.351575	0.126916	-2.77013	0.00560331	0.00933121	221.45	0.0871275	0.155074	0.561844	0.574222	0.69673
Atac2	246.923	-0.0974761	0.086979	-1.12069	0.262422	0.321133	282.028	0.0460856	0.121774	0.378453	0.705094	0.801671
Atac3	234.157	-0.213707	0.09299	-2.29817	0.0215523	0.032985	307.885	0.0300029	0.128803	0.232936	0.815811	0.882737
Ate1	741.076	0.522721	0.0513155	10.1864	2.28014e-24	9.46351e-24	781.738	0.0651412	0.0961621	0.677409	0.498146	0.630678
Atet	1378.42	-0.686645	0.0388491	-17.6747	6.57354e-70	5.05677e-69	1221.49	0.440517	0.215735	2.04194	0.0411575	0.0904926
Atf-2	407.679	-0.142853	0.0729462	-1.95833	0.0501913	0.0720642	439.48	0.181713	0.106365	1.70839	0.0875648	0.167274
Atf3	2326.48	1.06794	0.0313758	34.0371	6.30553e-254	1.34722e-252	663.207	-0.4362	0.208412	-2.09297	0.0363518	0.0818804
Atf6	2026.61	0.135192	0.0371383	3.64024	0.000272381	0.000524205	1866.98	-0.257093	0.0966849	-2.65908	0.00783549	0.0225545
Atg1	1332.45	-0.721962	0.0414644	-17.4116	6.73991e-68	5.08577e-67	575.832	0.307137	0.183705	1.6719	0.0945443	0.178011
Atg12	60.0553	-0.335674	0.18211	-1.84324	0.0652935	0.0917194	210.393	0.0520205	0.162966	0.31921	0.749568	0.83533
Atg13	853.637	0.0163798	0.047614	0.344012	0.730837	0.77593	735.632	-0.0805908	0.159367	-0.505694	0.613072	0.729632
Atg18	1098.1	-0.484763	0.0439354	-11.0336	2.63262e-28	1.18525e-27	1718.27	0.0179924	0.0840356	0.214104	0.830466	0.89297
Atg2	3264.09	-0.938952	0.0290778	-32.291	9.3587e-229	1.82808e-227	1183.18	0.283257	0.20272	1.39728	0.162329	0.272919
Atg4	971.762	-0.496498	0.0460999	-10.7701	4.76701e-27	2.09427e-26	834.411	-0.248417	0.243816	-1.01887	0.308266	0.444443
Atg5	351.683	-0.410209	0.0744016	-5.51345	3.51865e-08	8.78943e-08	708.251	0.0107661	0.108589	0.0991452	0.921023	0.951005
Atg6	271.543	-0.143254	0.0868593	-1.64926	0.0990936	0.134246	556.339	-0.0629411	0.130078	-0.483873	0.628476	0.742354
Atg7	428.102	-1.25938	0.0710078	-17.7358	2.21806e-70	1.71215e-69	961.752	1.04702	0.183834	5.69546	1.23043e-08	2.29447e-07
Atg8a	2894.53	-1.00566	0.0307765	-32.6761	3.4112e-234	6.80164e-233	18087.4	-0.00885548	0.0849273	-0.104271	0.916954	0.947659
Atg8b	16.6463	-1.59615	0.356406	-4.47847	7.51804e-06	1.63964e-05	180.727	1.54458	0.313012	4.93457	8.0329e-07	8.34666e-06
Atg9	1508.97	-0.848748	0.0376062	-22.5694	8.66597e-113	9.29465e-112	1857.24	-0.0918546	0.150265	-0.611283	0.541012	0.667637
Atox1	874.87	-0.62064	0.048305	-12.8484	8.78474e-38	4.60805e-37	2513.51	-0.0993431	0.120127	-0.826987	0.408244	0.54617
Atpalpha	14400.6	0.196554	0.0155679	12.6256	1.52554e-36	7.81912e-36	11222.1	-0.0273282	0.098424	-0.277657	0.781275	0.8595
AttA	21.0787	-1.52537	0.315063	-4.84147	1.2888e-06	2.95768e-06	78.3372	-1.56675	0.504059	-3.10827	0.00188187	0.00657492
AttB	45.2478	-1.16979	0.222222	-5.26408	1.40896e-07	3.40681e-07	359.437	-1.38183	0.54991	-2.51282	0.0119769	0.0321748
AttC	29.6453	-0.198636	0.245703	-0.80844	0.418838	0.482575	356.837	-0.161803	0.427596	-0.378402	0.705132	0.801671
AttD	9.93091	-1.65812	0.448701	-3.69537	0.000219568	0.000426351	52.1076	0.688476	0.468576	1.46929	0.141754	0.245454
Atu	731.927	-0.282206	0.0514345	-5.4867	4.09522e-08	1.01956e-07	142.317	-0.388249	0.303555	-1.27901	0.200895	0.320268
Atx-1	2.20698	-0.131479	0.701879	-0.187324	0.851406	0.878401	2.56062	-0.872862	0.566164	-1.54171	0.123144	NA
Atx2	2563.96	-0.576336	0.0295285	-19.518	7.72034e-85	6.65088e-84	749.188	0.554842	0.141708	3.91539	9.02581e-05	0.000478532
Aut1	419.814	-0.579352	0.067853	-8.53834	1.36168e-17	4.80808e-17	1147.34	-0.29356	0.117915	-2.48958	0.0127893	0.0339972
Aven	42.5076	-0.082485	0.204781	-0.402797	0.687098	0.737349	125.871	-0.219278	0.196848	-1.11395	0.265302	0.397379
Awh	141.949	0.125169	0.116038	1.07869	0.280725	0.340677	127.363	0.353613	0.185282	1.90851	0.0563254	0.117389
Axn	1512.84	-0.219271	0.0363037	-6.0399	1.5421e-09	4.14569e-09	353.102	0.344185	0.150939	2.2803	0.02259	0.0547921
Axs	742.498	-0.0863993	0.051625	-1.67359	0.0942103	0.128277	672.502	-0.274601	0.108772	-2.52454	0.0115849	0.0313177
Axud1	1130.77	-0.0904427	0.0442383	-2.04444	0.0409097	0.0597073	557.786	-0.0544758	0.107917	-0.504792	0.613705	0.730037
B-H1	51.6466	-1.33604	0.205596	-6.49835	8.12077e-11	2.31463e-10	20.1109	0.198924	0.369843	0.537859	0.590674	0.711073
B-H2	119.434	-0.855056	0.128914	-6.63278	3.29418e-11	9.52055e-11	19.0906	0.492842	0.402116	1.22562	0.220341	0.343375
B4	2064.34	-0.431148	0.0351886	-12.2525	1.62909e-34	8.09665e-34	704.306	0.155217	0.125813	1.23371	0.217311	0.339306
B52	4549.46	0.413786	0.0234204	17.6677	7.43074e-70	5.70638e-69	4704.58	0.0408749	0.0963557	0.424208	0.671414	0.775975
BBS1	7.93186	-0.81096	0.462889	-1.75195	0.0797816	0.110114	4.77344	0.330044	0.548661	0.601545	0.547477	0.673679
BBS4	30.0336	1.82292	0.262008	6.95747	3.46439e-12	1.03716e-11	29.4198	1.71095	0.340602	5.02332	5.07845e-07	5.64989e-06
BBS8	24.3207	1.51473	0.292432	5.17976	2.2217e-07	5.32123e-07	7.80932	1.00291	0.491568	2.04023	0.0413273	0.0907697
BCL7-like	393.09	-0.796698	0.0724435	-10.9975	3.92833e-28	1.75859e-27	426.639	-0.100957	0.139806	-0.722125	0.470218	0.604816
BEAF-32	368.119	-0.474861	0.0756889	-6.27385	3.52232e-10	9.78228e-10	1075.38	-0.0171763	0.108952	-0.15765	0.874732	0.921091
BG4	152.951	0.361065	0.111325	3.24335	0.00118135	0.00213389	210.281	0.0920809	0.162329	0.567249	0.570545	0.693892
BG642163	0	NA	NA	NA	NA	NA	0.175157	0.151883	0.256617	0.591866	0.55394	NA
BG642167	0	NA	NA	NA	NA	NA	0.124293	0.138322	0.247094	0.559797	0.575618	NA
BG642312	26.1907	2.29402	0.302188	7.59138	3.16514e-14	1.01084e-13	19.7005	0.185824	0.383652	0.484355	0.628134	0.74202
BHD	136.541	0.0555523	0.117007	0.474777	0.634946	0.689037	194.888	0.0422658	0.159974	0.264205	0.791622	0.866361
BI-1	686.231	-0.109772	0.0536302	-2.04682	0.0406755	0.0593914	2914.57	-0.138864	0.0947969	-1.46486	0.14296	0.247101
BM-40-SPARC	2451.14	0.583267	0.0291589	20.003	5.18219e-89	4.6091e-88	2195.41	-0.295799	0.142186	-2.08036	0.0374921	0.0837812
BRWD3	2571.96	-0.150759	0.0313344	-4.8113	1.49955e-06	3.4267e-06	454.106	0.0446282	0.200802	0.22225	0.824119	0.888557
BTBD9	346.222	-0.0989806	0.0751848	-1.3165	0.188007	0.239627	330.53	0.102935	0.20866	0.493313	0.621791	0.736837
Bace	339.065	0.954731	0.0771498	12.375	3.5673e-35	1.79085e-34	770.992	0.92696	0.342154	2.70919	0.00674482	0.0198092
Baldspot	2010.18	0.169151	0.0330862	5.11242	3.18055e-07	7.54517e-07	3057.16	-0.562723	0.164618	-3.41835	0.000630015	0.0025409
Bap	2153.15	-0.161362	0.0315354	-5.11685	3.10684e-07	7.37421e-07	1006.12	-0.0352773	0.216152	-0.163206	0.870356	0.91866
Bap170	1356.78	0.188924	0.0384734	4.91052	9.0837e-07	2.09933e-06	694.196	0.120183	0.0957332	1.25539	0.209337	0.330213
Bap55	427.715	-0.358588	0.0679292	-5.27885	1.29996e-07	3.15231e-07	967.823	-0.255692	0.0964708	-2.65046	0.00803833	0.0230477
Bap60	1015.35	-0.437064	0.0469085	-9.31736	1.19266e-20	4.56904e-20	667.136	-0.205667	0.177621	-1.1579	0.246906	0.375751
Bem46	307.078	0.13802	0.0799962	1.72533	0.0844685	0.116035	542.762	-0.120539	0.129222	-0.932811	0.350917	0.489812
Best1	1056.92	0.249664	0.0452588	5.51636	3.46084e-08	8.64825e-08	551.378	-0.266772	0.205579	-1.29766	0.194403	0.312484
Best2	997.709	-0.621627	0.0458264	-13.5648	6.47275e-42	3.61694e-41	552.194	-0.291079	0.1177	-2.47306	0.013396	0.0353908
Best3	32.216	0.151465	0.243009	0.623288	0.533095	0.59494	104.803	0.372244	0.283961	1.3109	0.189892	0.307097
Best4	17.1824	-0.313539	0.341832	-0.917232	0.359021	0.422996	49.3425	0.614622	0.306225	2.0071	0.0447394	0.0968108
Bet1	225.092	-0.131379	0.0928368	-1.41516	0.157022	0.203905	623.873	-0.381984	0.136956	-2.7891	0.00528554	0.016121
Bet3	311.315	-0.257554	0.0824464	-3.1239	0.00178472	0.00315964	714.801	-0.158254	0.130738	-1.21046	0.226102	0.350961
Bet5	98.3583	0.00272444	0.138273	0.0197033	0.98428	0.98803	282.947	0.0303357	0.165966	0.182783	0.854969	0.909131
Bgb	293.801	-0.785891	0.0854096	-9.20143	3.53204e-20	1.33861e-19	435.697	0.0325427	0.139991	0.232463	0.816179	0.882904
BicC	45.5809	-0.836358	0.210521	-3.97279	7.10344e-05	0.00014416	26.3807	1.25407	0.368094	3.40692	0.000657013	0.00263186
BicD	2437.35	0.472817	0.0289812	16.3146	7.77194e-60	5.43995e-59	1361.21	-0.157149	0.0828825	-1.89605	0.0579539	0.120058
Bili	97.3486	-0.422695	0.145016	-2.91481	0.00355903	0.00609452	89.5455	0.56701	0.215487	2.6313	0.00850599	0.0241437
Bin1	140.821	-0.0686775	0.120691	-0.569038	0.569331	0.627356	583.012	-0.0404392	0.120239	-0.336325	0.736626	0.825271
Bj1	1228.01	0.151417	0.0408151	3.70984	0.000207391	0.000403465	967.095	-0.353862	0.199456	-1.77414	0.0760407	0.149367
Bka	78.6968	0.0451819	0.155892	0.289829	0.771947	0.810853	221.052	0.115225	0.172032	0.669787	0.502994	0.634868
Blimp-1	381.972	-2.35135	0.0895937	-26.2446	8.24119e-152	1.1371e-150	81.058	1.36706	0.484962	2.8189	0.0048189	0.0149172
Blm	370.347	0.0543993	0.0742497	0.732653	0.46377	0.528053	196.032	0.117918	0.142912	0.82511	0.409309	0.547241
Bmcp	274.422	0.345844	0.0823369	4.20036	2.66494e-05	5.59698e-05	360.894	-0.0503791	0.112266	-0.448749	0.653613	0.76163
BoYb	31.6655	1.06063	0.241788	4.3866	1.15137e-05	2.48128e-05	54.921	1.99778	0.27951	7.14744	8.84141e-13	4.16551e-11
BobA	0.864752	0.0307099	0.814838	0.0376883	0.969936	0.977501	0.769022	-0.00902118	0.432244	-0.0208705	0.983349	NA
Br140	963.388	0.143295	0.047025	3.0472	0.00230983	0.00403823	98.1798	0.178677	0.192542	0.927991	0.353412	0.492465
Brca2	407.109	-0.101852	0.0697902	-1.45941	0.144454	0.189193	247.386	0.380967	0.141896	2.68484	0.00725648	0.0210731
Brd	82.8892	-0.222675	0.153023	-1.45517	0.145621	0.190592	223.288	0.474776	0.23282	2.03924	0.0414258	0.090938
Brd8	368.083	-0.161365	0.0738609	-2.18472	0.0289096	0.0433467	165.524	0.257312	0.154486	1.66561	0.095792	0.179708
Bre1	1143.58	-0.0692533	0.0423156	-1.63659	0.101716	0.137439	269.458	0.0374565	0.206643	0.181262	0.856162	0.910089
Brf	558.106	-0.108148	0.0596125	-1.81418	0.0696495	0.0972994	295.808	-0.250862	0.272773	-0.919672	0.357744	0.496887
Bro	0.741285	-1.65103	0.811789	-2.03382	0.0419698	0.0611152	2.07249	0.86016	0.564144	1.52472	0.12733	NA
Bruce	16555.1	0.0133865	0.0145074	0.922731	0.356148	0.420106	1993.41	-0.0949259	0.0943257	-1.00636	0.314241	0.451175
Bsg	5008.22	0.0141172	0.0217647	0.64863	0.516577	0.579538	10976.8	-0.0750502	0.0859264	-0.873423	0.382432	0.521053
Bsg25A	0	NA	NA	NA	NA	NA	0.42064	0.464098	0.414202	1.12046	0.262517	NA
Bsg25D	1357.02	-0.0155121	0.0387786	-0.400016	0.689144	0.739139	515.806	-0.196227	0.127939	-1.53375	0.12509	0.222235
BtbVII	2431.09	0.197518	0.0297073	6.6488	2.95485e-11	8.55087e-11	491.199	0.272874	0.156971	1.73837	0.0821459	0.159024
Btd	140.527	-1.06336	0.120241	-8.84359	9.26878e-19	3.37387e-18	356.944	-0.215544	0.277528	-0.776658	0.437361	0.573407
Bteb2	4.40549	0.341468	0.561667	0.607954	0.543218	0.60413	5.23481	-1.2725	0.534588	-2.38035	0.0172964	0.0438468
BthD	84.5903	0.0190426	0.149634	0.127261	0.898734	0.919115	169.686	-0.278233	0.168017	-1.65598	0.0977249	0.1827
Btk29A	2717.7	0.0881269	0.0285086	3.09124	0.00199323	0.00351143	1556.87	0.176576	0.0763956	2.31133	0.0208145	0.0510732
Bub1	579.243	0.0680745	0.0582111	1.16944	0.242226	0.299611	450.198	0.11205	0.141527	0.791722	0.428523	0.565006
Bub3	570.769	-0.514346	0.0594126	-8.65719	4.83531e-18	1.72686e-17	1376.92	-0.0279026	0.102491	-0.272245	0.785434	0.862092
BubR1	648.654	-0.619563	0.0560217	-11.0593	1.9756e-28	8.92438e-28	499.678	-0.163238	0.122436	-1.33325	0.182451	0.297811
Buffy	91.2216	0.557603	0.142655	3.90875	9.27751e-05	0.000186257	137.679	1.0187	0.177787	5.72992	1.00479e-08	1.91681e-07
Bx	256.804	-0.688289	0.087614	-7.85593	3.96829e-15	1.31032e-14	62.6365	0.319519	0.350893	0.910588	0.362512	0.501952
Bx42	716.213	-0.201732	0.054359	-3.71111	0.000206355	0.000401565	171.659	-0.111513	0.166649	-0.66915	0.5034	0.635212
Bzd	141.436	-0.284264	0.115483	-2.46151	0.0138353	0.0218359	249.653	0.168445	0.149246	1.12864	0.25905	0.39025
C15	53.9299	-0.952056	0.192963	-4.93386	8.06184e-07	1.86927e-06	23.67	-0.131865	0.407456	-0.323631	0.746217	0.83294
C1GalTA	632.439	-0.0277295	0.0561518	-0.493831	0.621426	0.676551	779.535	0.225703	0.157503	1.43301	0.151856	0.25952
C3G	2578.9	0.824115	0.030042	27.4321	1.13528e-165	1.69147e-164	377.312	0.0635575	0.152928	0.415605	0.677699	0.781207
C901	3.96408	1.73486	0.61994	2.79844	0.00513504	0.00859936	1.1903	0.495797	0.48909	1.01371	0.310719	NA
CAH1	3489.24	0.371919	0.0259861	14.3122	1.83499e-46	1.09456e-45	4310.16	-0.398875	0.113948	-3.50049	0.000464405	0.00195342
CAH2	1855.07	0.225528	0.0343162	6.57206	4.96249e-11	1.42502e-10	1790.99	-0.015972	0.188801	-0.0845972	0.932582	0.95891
CAHbeta	188.74	1.31219	0.107534	12.2026	3.01139e-34	1.48951e-33	301.672	-1.12956	0.335302	-3.36879	0.000754999	0.00297267
CAP	10173.1	2.05805	0.0183884	111.921	0	0	1778.38	-0.37942	0.105142	-3.60864	0.000307811	0.00137767
CAP-D2	700.184	-0.276357	0.0527376	-5.24022	1.60383e-07	3.86477e-07	504.819	-0.0439749	0.101753	-0.432173	0.665616	0.771281
CASK	2159.93	0.0616585	0.0319822	1.9279	0.0538674	0.0768415	499.544	0.0909369	0.16752	0.542841	0.587239	0.708103
CBP	1337.5	0.294721	0.0408569	7.2135	5.45327e-13	1.67627e-12	2403.47	0.304683	0.132371	2.30174	0.0213498	0.0521874
CCHa1	15.0758	0.684176	0.335928	2.03667	0.0416827	0.0607074	33.9807	-0.0781956	0.370401	-0.211111	0.832801	0.894815
CCHa1r	14.1664	0.19866	0.356838	0.556723	0.577717	0.635347	9.62327	-0.163161	0.522605	-0.312208	0.754883	0.839359
CCHa2	554.145	-0.57188	0.0604049	-9.46745	2.86748e-21	1.11602e-20	2080.68	-0.157365	0.13157	-1.19605	0.231676	0.357694
CCHa2r	27.1572	0.21579	0.255647	0.844094	0.398617	0.461811	10.9817	0.232846	0.458092	0.508295	0.611247	0.728017
CCKLR-17D1	13.9353	0.377138	0.358828	1.05103	0.293247	0.353988	4.90715	0.150602	0.545116	0.276275	0.782337	0.859983
CCKLR-17D3	44.7159	-1.16989	0.211443	-5.53286	3.15043e-08	7.8887e-08	39.3963	0.582801	0.308757	1.88757	0.0590835	0.121891
CCS	155.365	0.223313	0.111659	1.99996	0.0455043	0.0658836	433.937	-0.202472	0.145052	-1.39585	0.162758	0.273313
CD98hc	3747.13	0.115056	0.024845	4.63097	3.63954e-06	8.09932e-06	4992.16	-0.0753079	0.0845607	-0.890578	0.373156	0.512003
CDC45L	343.103	0.0517506	0.0754515	0.685879	0.492789	0.55624	290.234	-0.606547	0.138885	-4.36725	1.25821e-05	8.79195e-05
CDase	481.311	-0.404295	0.0633794	-6.37897	1.78288e-10	5.0063e-10	676	-0.090043	0.212642	-0.423448	0.671968	0.776111
CG10000	42.1328	2.57633	0.249975	10.3063	6.59734e-25	2.76981e-24	7.25923	0.133782	0.487024	0.274692	0.783553	0.860635
CG10005	164.728	-0.391514	0.108512	-3.60804	0.000308518	0.00058928	385.067	0.217997	0.123862	1.75999	0.0784091	0.153197
CG10006	1159.53	-1.05128	0.0435718	-24.1275	1.28666e-128	1.53157e-127	2151.25	0.101157	0.0966465	1.04666	0.295254	0.429819
CG10011	1505.83	-0.298165	0.0386387	-7.71675	1.19333e-14	3.8709e-14	445.314	0.522173	0.138529	3.76941	0.000163633	0.000800654
CG10013	18.5627	-0.290565	0.310921	-0.93453	0.350031	0.413799	77.398	0.661785	0.287258	2.3038	0.0212337	0.0519429
CG10014	24.9704	-0.750547	0.27843	-2.69564	0.00702531	0.0115536	64.6776	0.913286	0.358616	2.5467	0.0108748	0.0297996
CG10019	194.161	0.156741	0.101689	1.54137	0.123227	0.163512	132.531	1.12995	0.195719	5.77337	7.77035e-09	1.54143e-07
CG10026	695.455	-0.839739	0.0555075	-15.1284	1.05248e-51	6.7194e-51	1829.4	-0.259788	0.193768	-1.34072	0.180012	0.294729
CG10029	0.312401	-0.920218	0.739381	-1.24458	0.213287	NA	0.615261	0.475409	0.410744	1.15743	0.247095	NA
CG10031	37.3743	-0.0357943	0.225701	-0.158592	0.873991	0.898322	395.267	-1.30228	0.236938	-5.49629	3.87857e-08	6.2087e-07
CG10032	1.71392	0.0280959	0.740407	0.0379465	0.96973	0.977367	0	NA	NA	NA	NA	NA
CG10035	0.104697	-0.314725	0.538479	-0.58447	0.558904	NA	1.1841	0.466308	0.479771	0.971941	0.33108	NA
CG10038	197.675	-0.335971	0.102353	-3.28246	0.00102906	0.00186986	636.485	-0.130163	0.129057	-1.00858	0.313178	0.450168
CG10041	13.7936	0.342691	0.350684	0.977206	0.328467	0.390885	5.06267	-0.492576	0.542616	-0.907779	0.363995	0.503334
CG10050	95.9586	0.265376	0.137377	1.93174	0.0533918	0.0761954	91.6379	-0.0958694	0.190804	-0.50245	0.615351	0.731435
CG10051	854.095	1.13376	0.0541007	20.9566	1.63441e-97	1.55009e-96	1363.89	-1.08766	0.260398	-4.17691	2.95491e-05	0.000183308
CG10053	47.4	-0.299334	0.193238	-1.54904	0.121371	0.16132	194.403	-0.0123987	0.168773	-0.0734634	0.941437	0.964626
CG10055	419.728	0.0093189	0.0682169	0.136607	0.891341	0.912919	582.68	0.174744	0.108409	1.61189	0.106986	0.19644
CG10062	446.796	0.954361	0.0736589	12.9565	2.15891e-38	1.14272e-37	475.532	-0.443381	0.173302	-2.55843	0.0105146	0.0289529
CG10063	28.3093	-0.585834	0.257836	-2.27212	0.0230793	0.0351619	169.269	0.400312	0.276848	1.44596	0.148188	0.254439
CG10064	46.0109	-1.81852	0.231118	-7.86839	3.59223e-15	1.18906e-14	246.421	1.29858	0.289476	4.48598	7.25801e-06	5.47786e-05
CG10068	317.665	0.44361	0.077162	5.74907	8.97367e-09	2.32141e-08	633.673	-0.228985	0.136772	-1.67422	0.0940882	0.17726
CG10073	40.3836	0.242042	0.218206	1.10924	0.267328	0.326454	471.404	1.06629	0.566659	1.88172	0.0598744	0.123216
CG10075	130.409	0.749168	0.124245	6.02975	1.64211e-09	4.40736e-09	270.669	-0.263721	0.124225	-2.12294	0.0337592	0.0768339
CG10077	9423.05	0.294295	0.0194382	15.14	8.8231e-52	5.63831e-51	1698.46	0.108882	0.142849	0.762222	0.445928	0.581633
CG10081	16.7408	-4.06038	0.543966	-7.4644	8.36807e-14	2.64111e-13	3.2216	-0.738115	0.566553	-1.30282	0.192637	NA
CG10082	2511.09	-0.393268	0.0299714	-13.1214	2.48169e-39	1.33513e-38	1506.85	-0.020131	0.149569	-0.134593	0.892933	0.933381
CG10083	1156.07	-0.534702	0.0423433	-12.6278	1.48386e-36	7.60838e-36	1403.6	-0.0956919	0.176627	-0.541773	0.587975	0.708715
CG10086	419.109	1.15397	0.0738473	15.6264	4.80878e-55	3.18037e-54	371.344	-0.817518	0.21061	-3.88166	0.000103746	0.000540594
CG10089	102.513	-0.362339	0.134376	-2.69645	0.00700827	0.011528	213.81	1.02203	0.23369	4.37342	1.22313e-05	8.5999e-05
CG10092	272.036	0.232188	0.0855492	2.71409	0.00664586	0.0109561	209.496	-0.132462	0.144527	-0.916523	0.359393	0.498397
CG10096	5.83221	2.17892	0.575703	3.7848	0.000153834	0.000302468	0.617932	-0.0692616	0.358518	-0.193188	0.846811	NA
CG10097	0	NA	NA	NA	NA	NA	0	NA	NA	NA	NA	NA
CG10098	498.548	-0.65525	0.0673136	-9.73428	2.15334e-22	8.62043e-22	993.755	0.0217605	0.15173	0.143416	0.885962	0.928826
CG10103	958.602	0.0966823	0.0458913	2.10677	0.0351377	0.0518804	1060.05	-0.103962	0.206961	-0.502326	0.615438	0.73144
CG10104	4.55451	-1.92538	0.624501	-3.08307	0.00204875	0.00360524	21.2247	0.3285	0.381615	0.860815	0.38934	0.527747
CG10116	138.926	1.28099	0.120775	10.6064	2.78226e-26	1.20616e-25	521.837	-0.710286	0.214173	-3.31642	0.000911803	0.00352205
CG10126	709.753	-0.571108	0.0558394	-10.2277	1.49034e-24	6.22202e-24	2600.89	0.243414	0.132294	1.83994	0.0657765	0.132835
CG10131	631.017	-0.379326	0.0579611	-6.5445	5.96957e-11	1.71019e-10	923.661	0.385917	0.114327	3.37554	0.000736708	0.0029145
CG10132	680.96	1.24769	0.0601522	20.7423	1.43858e-95	1.34071e-94	78.2113	0.132438	0.223177	0.593421	0.5529	0.678202
CG10133	116.927	-0.37702	0.12611	-2.98962	0.00279324	0.0048343	203.901	-0.183663	0.167328	-1.09763	0.272368	0.405472
CG10137	158.633	0.281126	0.107848	2.60668	0.0091424	0.014819	70.1508	0.0060079	0.212821	0.0282298	0.977479	0.987164
CG10139	136.507	-0.0499224	0.120638	-0.413819	0.679007	0.729955	441.454	0.0731423	0.113855	0.642415	0.520604	0.650258
CG10140	113.618	-0.0919667	0.129857	-0.708215	0.478812	0.542742	370.102	0.227034	0.178293	1.27338	0.202885	0.32245
CG10144	721.582	0.246691	0.0511098	4.8267	1.38816e-06	3.17918e-06	480.796	0.0476425	0.119015	0.400308	0.68893	0.789034
CG10147	164.95	0.0141955	0.109469	0.129676	0.896823	0.917509	169.219	-0.052041	0.163876	-0.317564	0.750816	0.835898
CG10151	126.148	-1.11664	0.128238	-8.70752	3.10596e-18	1.11488e-17	103.825	-0.0701559	0.319376	-0.219665	0.826132	0.890059
CG10153	144.315	-0.177702	0.114986	-1.54543	0.122242	0.162389	474.349	-0.119947	0.131621	-0.911308	0.362133	0.501527
CG10154	401.379	1.51355	0.0730335	20.724	2.10358e-95	1.95235e-94	387.095	-2.2719	0.337648	-6.72859	1.7132e-11	6.37988e-10
CG10157	174.845	-3.75418	0.175087	-21.4418	5.45056e-102	5.3663e-101	930.692	1.14531	0.151937	7.53808	4.76946e-14	2.77208e-12
CG10158	330.965	-0.426317	0.0767927	-5.55153	2.8318e-08	7.11338e-08	594.96	0.231306	0.138438	1.67083	0.0947548	0.178273
CG10163	6.35768	2.17898	0.547419	3.98047	6.87802e-05	0.000139733	5.46889	-0.577489	0.561795	-1.02794	0.30398	0.440049
CG10164	53.8776	-0.628947	0.188435	-3.33774	0.000844617	0.00154896	329.945	1.4301	0.300756	4.75503	1.9842e-06	1.80802e-05
CG10165	162.196	1.23303	0.112529	10.9574	6.12427e-28	2.73073e-27	236.113	-1.26796	0.177696	-7.13556	9.63937e-13	4.50731e-11
CG10166	286.646	0.316046	0.0805573	3.92324	8.73666e-05	0.00017603	929.568	-0.273964	0.141752	-1.93271	0.0532724	0.11221
CG10168	112.574	1.50174	0.136107	11.0335	2.63471e-28	1.1858e-27	26.5238	0.41617	0.31353	1.32737	0.184387	0.300262
CG10170	690.321	1.46499	0.0556823	26.3099	1.47898e-152	2.04485e-151	357.564	-0.335245	0.167188	-2.0052	0.0449414	0.0971297
CG10171	294.844	-0.722649	0.0860509	-8.39793	4.5442e-17	1.57843e-16	647.468	0.136992	0.1261	1.08637	0.277313	0.411133
CG10175	185.176	1.40281	0.104828	13.382	7.70277e-41	4.23211e-40	152.666	0.600704	0.201059	2.9877	0.00281081	0.00932787
CG10176	423.133	-0.835758	0.0702224	-11.9016	1.16125e-32	5.61169e-32	1209.2	0.183663	0.10331	1.77778	0.0754394	0.148397
CG10177	23.1938	-1.37795	0.299661	-4.59836	4.25827e-06	9.43871e-06	205.228	1.1318	0.285088	3.96998	7.18777e-05	0.000394708
CG10178	1007.84	-2.30404	0.054553	-42.2348	0	0	2295.94	-0.0289334	0.114347	-0.253031	0.800244	0.872496
CG10182	1507.14	1.18298	0.0374853	31.5584	1.37545e-218	2.60714e-217	2042.13	-0.667154	0.347163	-1.92173	0.0546393	0.114527
CG10183	3.25472	0.866992	0.627599	1.38144	0.167143	0.215632	2.7476	-1.04731	0.526276	-1.99004	0.0465866	NA
CG10184	410.389	0.976162	0.0700293	13.9393	3.65369e-44	2.10919e-43	419.184	-1.84867	0.137815	-13.4141	4.99676e-41	3.27104e-38
CG10185	9.29105	0.547422	0.415583	1.31724	0.187758	0.239355	5.47984	0.269036	0.531009	0.506651	0.6124	0.729181
CG10186	280.367	0.692253	0.0816183	8.48159	2.22143e-17	7.79064e-17	77.0375	-0.491664	0.258163	-1.90447	0.0568484	0.118221
CG10188	913.843	-0.0440088	0.0469601	-0.937153	0.34868	0.412408	379.927	-0.0159943	0.160871	-0.0994235	0.920802	0.950925
CG10189	163.961	0.140765	0.107912	1.30444	0.192082	0.244103	242.207	-0.0826182	0.144759	-0.57073	0.568183	0.692373
CG10194	191.745	0.650906	0.10194	6.38519	1.71185e-10	4.81186e-10	334.274	-0.517612	0.150215	-3.4458	0.000569365	0.002328
CG10195	246.11	0.0651101	0.087276	0.746026	0.455652	0.519558	332.618	-0.521882	0.148206	-3.52133	0.000429386	0.00182339
CG10200	2501.79	2.044	0.0325946	62.7097	0	0	3215.47	-0.0693234	0.157027	-0.441476	0.658869	0.765351
CG10202	30.6096	-1.54849	0.272964	-5.67288	1.40417e-08	3.59236e-08	134.185	1.27575	0.310094	4.11407	3.8874e-05	0.000232907
CG10205	174.961	1.21684	0.109678	11.0947	1.33108e-28	6.03317e-28	248.837	-0.391509	0.184345	-2.12378	0.0336883	0.0767287
CG10208	168.47	0.892147	0.106668	8.36381	6.0726e-17	2.10118e-16	201.565	-0.799848	0.156031	-5.1262	2.9565e-07	3.58411e-06
CG10209	204.84	0.0304962	0.0946608	0.322162	0.74733	0.789696	247.876	0.0188584	0.172473	0.109341	0.912932	0.945191
CG1021	1517.89	0.0529874	0.0367169	1.44313	0.148982	0.194651	447.032	0.250903	0.13575	1.84827	0.0645631	0.130873
CG10211	6280.53	0.975905	0.0210227	46.4216	0	0	1862.88	-0.870875	0.250046	-3.48286	0.000496092	0.00206299
CG10214	123.319	0.3595	0.124674	2.88352	0.00393264	0.00668996	321.005	-0.146823	0.135548	-1.08318	0.278727	0.412764
CG10217	1099.7	-0.450458	0.0425638	-10.5831	3.56944e-26	1.54492e-25	1653.7	-0.116246	0.0895869	-1.29758	0.194432	0.312484
CG10219	702.791	0.996688	0.0535108	18.6259	1.98065e-77	1.61126e-76	1939.36	-0.85258	0.141859	-6.01007	1.85448e-09	4.31142e-08
CG10222	87.4074	-0.236053	0.145642	-1.62078	0.105065	0.141522	171.412	-0.150121	0.154581	-0.971151	0.331473	0.469735
CG10226	332.292	2.71047	0.0957664	28.303	3.17821e-176	5.07872e-175	76.7297	-0.952597	0.337768	-2.82027	0.00479829	0.0148571
CG10232	39.897	1.29021	0.224377	5.75019	8.91441e-09	2.30697e-08	52.8802	1.60005	0.320073	4.99903	5.76198e-07	6.28814e-06
CG10237	594.744	0.253697	0.0561119	4.52127	6.14697e-06	1.34894e-05	841.692	0.532332	0.187864	2.8336	0.0046027	0.014348
CG1024	318.768	0.175358	0.0769509	2.27882	0.0226776	0.0345733	252.127	0.107515	0.15268	0.704182	0.481319	0.615214
CG10249	4811.53	0.938568	0.0221152	42.44	0	0	841.828	-0.184385	0.111751	-1.64997	0.09895	0.184609
CG10252	70.91	-0.541043	0.163162	-3.31599	0.000913182	0.00166901	974.851	1.44783	0.288017	5.02688	4.98518e-07	5.55607e-06
CG10253	108.73	-0.39496	0.135434	-2.91625	0.00354262	0.00607028	137.579	0.577622	0.178081	3.24358	0.00118036	0.0043838
CG10254	1639.05	0.168982	0.0360186	4.69153	2.71169e-06	6.08083e-06	957.741	0.403832	0.200155	2.0176	0.0436327	0.0948451
CG10257	7.34686	-2.27059	0.54643	-4.15532	3.24839e-05	6.76615e-05	10.6002	0.146268	0.439736	0.332628	0.739415	0.827373
CG10262	56.9832	0.754159	0.179078	4.21134	2.53856e-05	5.34394e-05	112.697	0.248776	0.207136	1.20103	0.229741	0.355457
CG10264	1.12145	0.089335	0.798724	0.111847	0.910945	0.928634	1.8622	0.464633	0.558735	0.83158	0.405646	NA
CG10265	82.691	-0.0183753	0.152673	-0.120357	0.9042	0.9233	243.304	0.540269	0.176065	3.06858	0.00215078	0.00737562
CG10268	113.488	0.00411472	0.126984	0.0324034	0.97415	0.980498	166.784	0.0310102	0.187308	0.165558	0.868505	0.917527
CG10274	397.221	0.00360993	0.0703879	0.0512861	0.959098	0.968866	203.829	-0.238783	0.273984	-0.87152	0.38347	0.522067
CG10277	1662.38	-0.576974	0.0354877	-16.2584	1.94691e-59	1.35708e-58	2294.46	0.0287142	0.0956099	0.300327	0.763928	0.845726
CG10280	6.68055	0.47476	0.476577	0.996186	0.31916	0.381227	9.77399	-0.384282	0.477436	-0.804887	0.420885	0.558277
CG10283	200.396	-0.463751	0.0972821	-4.76707	1.86921e-06	4.24115e-06	210.904	0.53747	0.188026	2.85849	0.00425668	0.01338
CG10286	570.203	-0.0458116	0.0568008	-0.806531	0.419937	0.48353	622.875	-0.230403	0.109325	-2.10751	0.0350731	0.0794028
CG10289	2948.03	0.162684	0.0288745	5.63417	1.75908e-08	4.47733e-08	1503.57	-0.0780572	0.0817693	-0.954604	0.339778	0.478614
CG10298	13.6417	-0.952011	0.378739	-2.51363	0.0119495	0.0190385	152.631	0.997337	0.308814	3.22957	0.00123976	0.00457192
CG10300	238.228	1.21066	0.0965073	12.5448	4.24742e-36	2.15889e-35	455.413	0.315256	0.143734	2.19333	0.0282833	0.0659891
CG10301	9.82247	1.56056	0.426031	3.66301	0.000249266	0.000481789	31.2652	0.966209	0.363794	2.65592	0.00790915	0.0227454
CG10306	1503.53	-0.216025	0.0385367	-5.6057	2.0741e-08	5.25525e-08	4207.75	-0.200262	0.112241	-1.78421	0.0743894	0.146749
CG10307	23.7908	0.517103	0.271201	1.90672	0.0565573	0.0803461	109.097	1.25241	0.28443	4.40322	1.06656e-05	7.63723e-05
CG10311	456.387	0.587287	0.0668644	8.78326	1.58798e-18	5.74916e-18	1248.32	-0.888754	0.242511	-3.6648	0.000247536	0.00114328
CG10317	28.2293	-0.53891	0.259935	-2.07325	0.0381493	0.0559398	232.461	1.66995	0.261252	6.3921	1.63623e-10	4.93968e-09
CG10320	531.795	0.982442	0.0608979	16.1326	1.50559e-58	1.03709e-57	1601.22	-0.835674	0.128069	-6.52517	6.79261e-11	2.20017e-09
CG10321	1324.1	0.167079	0.0393272	4.24843	2.15274e-05	4.55098e-05	224.825	0.0338768	0.231742	0.146183	0.883777	0.927239
CG10324	135.187	0.170736	0.119456	1.42928	0.152924	0.199181	154.029	-0.0483082	0.175823	-0.274755	0.783505	0.860635
CG10326	437.725	-0.575378	0.067865	-8.47827	2.2856e-17	8.00945e-17	1466.49	0.23646	0.139252	1.69807	0.0894944	0.170125
CG10332	0	NA	NA	NA	NA	NA	0	NA	NA	NA	NA	NA
CG10333	579.735	-0.106844	0.0573218	-1.86393	0.0623309	0.0878885	383.028	-0.293629	0.169684	-1.73045	0.0835504	0.161191
CG10336	99.3872	-0.0785003	0.135434	-0.57962	0.562171	0.621008	186.613	-0.254513	0.186657	-1.36353	0.172715	0.285622
CG10337	158.325	-0.170851	0.108119	-1.58022	0.114056	0.152594	354.725	-0.447854	0.265743	-1.68529	0.0919332	0.173816
CG10338	291.86	0.0271575	0.0813175	0.333969	0.738403	0.782076	360.987	-0.265171	0.129939	-2.04074	0.0412766	0.0906745
CG10339	17.9828	0.493385	0.307396	1.60505	0.108484	0.145704	8.95733	0.473726	0.514411	0.920909	0.357098	0.496211
CG10340	339.284	0.7668	0.0759432	10.097	5.69461e-24	2.3461e-23	663.482	-0.325905	0.107056	-3.04424	0.00233272	0.00792958
CG10341	357.512	0.0248365	0.0719075	0.345395	0.729798	0.775316	511.828	-0.242485	0.125482	-1.93244	0.0533058	0.112262
CG10343	171.263	0.132639	0.104189	1.27305	0.202999	0.256329	590.841	-0.0666956	0.126404	-0.527638	0.597751	0.717439
CG10344	72.7383	0.285402	0.156449	1.82424	0.0681151	0.0953243	120.105	0.176754	0.259621	0.680815	0.495988	0.628854
CG10345	70.7699	0.972157	0.165393	5.87785	4.15634e-09	1.09352e-08	66.9422	-0.146391	0.250507	-0.584376	0.558968	0.683958
CG10347	332.26	-0.304173	0.0751887	-4.04546	5.22214e-05	0.000106917	582.724	-0.291028	0.0962867	-3.02252	0.00250681	0.00844293
CG10348	31.6253	0.487098	0.244491	1.99229	0.0463388	0.0669404	29.6869	0.745619	0.40581	1.83736	0.0661565	0.133429
CG10352	10.2978	1.95988	0.440825	4.44594	8.75086e-06	1.9005e-05	5.62914	-0.449325	0.528882	-0.849575	0.395561	0.533684
CG10353	2873.67	1.08049	0.0277723	38.9053	0	0	772.661	-0.300366	0.141521	-2.12241	0.0338033	0.076892
CG10357	11.0893	1.57118	0.404696	3.88238	0.000103439	0.000206924	1.02205	-0.142246	0.498727	-0.285219	0.775476	NA
CG10359	1792.81	0.846664	0.0385947	21.9373	1.14451e-106	1.16878e-105	1618.09	-0.182488	0.110754	-1.64769	0.0994153	0.185248
CG10361	196.349	1.6192	0.102827	15.7468	7.22739e-56	4.82269e-55	213.207	-1.16864	0.24103	-4.84853	1.2438e-06	1.20674e-05
CG10362	79.9818	-0.620215	0.165067	-3.75736	0.000171714	0.000335806	43.3183	0.34452	0.264211	1.30396	0.192248	0.310059
CG10365	923.013	-0.899943	0.0492293	-18.2806	1.1802e-74	9.38505e-74	2456.46	0.239061	0.0794325	3.00961	0.00261587	0.00876515
CG10366	279.042	-0.133245	0.0824748	-1.61558	0.106184	0.142877	173.639	0.0911798	0.252287	0.361413	0.717791	0.81089
CG10375	266.697	-0.217237	0.0841322	-2.58209	0.00982026	0.0158642	843.484	0.0566594	0.110696	0.511848	0.608757	0.726416
CG10376	520.24	-0.0106175	0.0600277	-0.176877	0.859605	0.885725	503.657	-0.296741	0.11223	-2.64404	0.00819237	0.0234191
CG10383	669.946	1.34949	0.0556298	24.2585	5.38253e-130	6.45856e-129	651.537	-0.057963	0.191087	-0.303333	0.761636	0.84394
CG10384	20.1762	0.164733	0.290243	0.567567	0.570329	0.628353	1.72796	0.0883565	0.521636	0.169383	0.865495	NA
CG10395	168.252	-0.0365372	0.113221	-0.322706	0.746918	0.789447	352.311	0.217252	0.115536	1.88039	0.0600554	0.12354
CG10396	46.5672	-1.01728	0.211962	-4.79937	1.59167e-06	3.63105e-06	343.647	1.32703	0.282193	4.70256	2.56924e-06	2.24532e-05
CG10399	164.032	0.806046	0.113107	7.12638	1.03041e-12	3.13793e-12	282.545	-0.646335	0.167929	-3.84885	0.000118672	0.00060618
CG10405	87.885	0.541315	0.146018	3.70719	0.00020957	0.000407586	227.674	-0.310363	0.209048	-1.48465	0.137637	0.239968
CG10407	132.443	-0.593761	0.120023	-4.94706	7.53414e-07	1.74963e-06	122.769	-0.53189	0.23743	-2.2402	0.025078	0.059835
CG1041	2224.22	0.969842	0.0316637	30.6295	4.96018e-206	9.09412e-205	2270.94	-0.83439	0.182702	-4.56694	4.94893e-06	3.94329e-05
CG10413	2006.55	-0.255748	0.0334971	-7.63494	2.25925e-14	7.25671e-14	2359.86	0.202588	0.146233	1.38537	0.165938	0.277097
CG10417	1610.23	0.0196272	0.035995	0.545276	0.585563	0.642871	2803.12	0.0545059	0.0911052	0.598274	0.549657	0.67577
CG10418	74.3613	-0.489098	0.159787	-3.06094	0.00220646	0.00386655	307.899	-0.151506	0.179261	-0.84517	0.398016	0.536352
CG10420	186.368	0.614616	0.101297	6.06747	1.29945e-09	3.50176e-09	318.15	-0.290396	0.192575	-1.50796	0.131565	0.231458
CG10424	420.956	-0.76875	0.0722294	-10.6432	1.87635e-26	8.16589e-26	1075.9	-0.326509	0.1028	-3.17617	0.00149235	0.00537402
CG10425	626.969	-0.132998	0.0563754	-2.35915	0.0183169	0.0283529	1423.65	-0.680223	0.0997202	-6.82132	9.02099e-12	3.49542e-10
CG10426	399.243	0.849923	0.0771619	11.0148	3.24265e-28	1.45551e-27	211.046	-0.193085	0.157256	-1.22784	0.219506	0.342219
CG10428	330.452	0.129766	0.0761279	1.70458	0.0882733	0.120867	484.458	0.139693	0.111454	1.25338	0.210069	0.331116
CG10431	87.1204	-0.0659916	0.148101	-0.445585	0.655897	0.708398	79.8491	0.207209	0.216631	0.956505	0.338817	0.477551
CG10433	484.925	0.796461	0.0635785	12.5272	5.3001e-36	2.69192e-35	1175.36	-1.01283	0.239206	-4.23415	2.29414e-05	0.000147465
CG10435	351.763	-0.633292	0.0753702	-8.40243	4.3735e-17	1.52111e-16	523.767	-0.195273	0.137303	-1.42221	0.154965	0.263602
CG10440	331.401	-2.51262	0.09974	-25.1918	4.93232e-140	6.29491e-139	232.043	0.69492	0.196281	3.54043	0.000399477	0.00172106
CG10444	1327.34	-0.352646	0.0398703	-8.84484	9.16588e-19	3.33731e-18	1236.68	0.199704	0.14052	1.42118	0.155265	0.263913
CG10445	131.833	0.0820883	0.121841	0.673732	0.500482	0.563929	76.7593	-0.0942715	0.20248	-0.465585	0.641513	0.75205
CG10459	42.3313	-2.10779	0.249338	-8.45355	2.82565e-17	9.87104e-17	151.106	1.24613	0.258468	4.82122	1.42683e-06	1.35472e-05
CG10462	572.248	0.52046	0.0593655	8.76706	1.834e-18	6.62912e-18	506.25	0.118322	0.121502	0.973828	0.330142	0.468389
CG10463	209.352	0.486195	0.0957759	5.07638	3.8469e-07	9.10024e-07	191.548	0.0424907	0.187739	0.226329	0.820946	0.886437
CG10465	621.96	-0.295277	0.0554767	-5.32255	1.02323e-07	2.49296e-07	1840.88	-0.112318	0.102085	-1.10025	0.271225	0.403964
CG10466	49.4229	-0.0787001	0.192648	-0.408517	0.682894	0.733665	151.004	0.249266	0.173976	1.43276	0.151926	0.259603
CG10467	1317.17	0.172261	0.0404836	4.25509	2.08965e-05	4.42318e-05	2301.06	-0.686665	0.130372	-5.26697	1.38693e-07	1.8812e-06
CG10469	153.909	0.120083	0.11046	1.08711	0.276987	0.33681	146.661	-0.37833	0.163042	-2.32044	0.0203171	0.05009
CG10470	261.524	0.316538	0.0853327	3.70946	0.000207703	0.000404013	844.361	-0.17858	0.121408	-1.47091	0.141315	0.244852
CG10472	5287.55	1.6711	0.0228715	73.0648	0	0	16667.4	-1.61433	0.296237	-5.44946	5.05219e-08	7.86473e-07
CG10474	13.303	3.30807	0.487315	6.78836	1.13413e-11	3.33442e-11	0.759075	-0.33492	0.444662	-0.7532	0.45133	NA
CG10476	0.817723	-0.437918	0.8157	-0.536861	0.591363	0.64818	5.82124	-1.34126	0.56664	-2.36703	0.0179314	0.0452189
CG10477	0.348628	-0.173916	0.764172	-0.227587	0.819967	NA	1.99467	0.51409	0.560343	0.917455	0.358904	NA
CG10479	36.4971	-0.657041	0.233343	-2.81578	0.00486595	0.0081793	68.7834	0.234812	0.222867	1.0536	0.292067	0.426377
CG10481	5.76855	-0.354311	0.509202	-0.695816	0.486544	0.550207	12.1966	0.776317	0.42897	1.80972	0.0703387	0.140204
CG10483	172.998	1.07445	0.105052	10.2278	1.48792e-24	6.21387e-24	236.883	-0.59669	0.183742	-3.24742	0.00116455	0.00434868
CG10486	21.5131	0.213166	0.28401	0.75056	0.452917	0.516702	29.4963	0.526843	0.379915	1.38674	0.165522	0.276715
CG10492	967.521	-0.02819	0.0479875	-0.587444	0.556905	0.616191	454.088	0.294032	0.139389	2.10943	0.0349073	0.0790419
CG10494	142.948	0.138914	0.116655	1.19081	0.233727	0.290489	106.638	-0.180309	0.198107	-0.91016	0.362738	0.50199
CG10495	90.2055	0.0163172	0.145857	0.111871	0.910926	0.928634	106.319	0.2054	0.226609	0.906408	0.36472	0.503763
CG10496	364.942	0.146183	0.0717199	2.03825	0.0415247	0.0604933	298.186	-0.160132	0.123934	-1.29207	0.196332	0.314648
CG10505	1377.71	-0.70894	0.0398825	-17.7757	1.09013e-70	8.4342e-70	851.442	-0.660411	0.160376	-4.11788	3.82372e-05	0.000229645
CG10508	116.26	-0.210907	0.126865	-1.66245	0.0964219	0.130956	123.095	0.286076	0.17279	1.65563	0.0977977	0.182781
CG10510	22.2045	-1.57268	0.310031	-5.07265	3.92308e-07	9.27228e-07	119.712	0.952764	0.291277	3.27099	0.00107171	0.00405042
CG10512	1931.61	0.765384	0.033864	22.6017	4.17017e-113	4.48343e-112	1190.08	-1.01949	0.19294	-5.284	1.26394e-07	1.73852e-06
CG10513	1300.44	-1.29418	0.0428141	-30.2279	1.01792e-200	1.82641e-199	4747.12	-0.691992	0.212309	-3.25937	0.00111661	0.00419588
CG10514	942.167	-0.270137	0.0484865	-5.57139	2.52711e-08	6.36585e-08	4311.08	-0.0483062	0.156942	-0.307797	0.758237	0.841448
CG10516	306.982	-2.09636	0.094754	-22.1242	1.84778e-108	1.91312e-107	706.496	1.1883	0.183146	6.48824	8.6845e-11	2.75556e-09
CG10527	4556.34	0.336836	0.022808	14.7683	2.34483e-49	1.45419e-48	2876.9	-0.831277	0.186387	-4.45996	8.19736e-06	6.09801e-05
CG10543	1316.86	0.104476	0.0401808	2.60014	0.0093185	0.0150899	264.928	0.151007	0.20428	0.739219	0.459774	0.595881
CG10550	702.259	1.28547	0.054883	23.422	2.54989e-121	2.87966e-120	1110.47	-0.586829	0.213297	-2.75123	0.00593727	0.0177775
CG10553	68.4361	3.47334	0.235394	14.7554	2.83803e-49	1.75681e-48	29.5019	-1.1551	0.320988	-3.59859	0.000319946	0.00142583
CG10555	1215.7	-0.304699	0.0449236	-6.78259	1.18038e-11	3.46508e-11	216.485	0.229765	0.220701	1.04107	0.297844	0.432829
CG10559	65.5445	0.366396	0.170567	2.14811	0.0317053	0.0471596	106.4	-0.158432	0.199204	-0.795323	0.426425	0.563104
CG10560	299.216	2.73394	0.0976992	27.9833	2.59661e-172	4.04355e-171	370.756	-0.987758	0.249934	-3.95208	7.74752e-05	0.000419337
CG10561	178.115	0.76504	0.101584	7.53107	5.03259e-14	1.59776e-13	203.799	0.374254	0.222368	1.68304	0.0923674	0.174441
CG10562	76.3817	2.26898	0.182239	12.4506	1.38787e-35	7.00659e-35	60.7831	-0.910502	0.325213	-2.79971	0.00511488	0.0156851
CG10565	1368.53	0.303813	0.0378405	8.02879	9.8437e-16	3.30064e-15	858.485	-0.256517	0.263922	-0.971942	0.331079	0.469337
CG10566	50.4751	-0.820321	0.194759	-4.21198	2.5314e-05	5.32979e-05	111.777	0.103242	0.181849	0.567734	0.570216	0.693873
CG10570	0	NA	NA	NA	NA	NA	0	NA	NA	NA	NA	NA
CG10576	3840.92	0.311511	0.0253761	12.2758	1.22196e-34	6.0777e-34	6133.83	-0.394544	0.0627131	-6.29125	3.14921e-10	8.86197e-09
CG10581	39.1351	-1.62222	0.248356	-6.53181	6.49774e-11	1.85913e-10	88.4115	-0.342439	0.193544	-1.76931	0.0768414	0.150631
CG10584	99.479	0.0917995	0.137085	0.669655	0.503078	0.566474	129.999	-0.111323	0.234182	-0.475372	0.634522	0.747636
CG10585	360.365	0.111239	0.0723623	1.53725	0.124232	0.164683	229.479	-0.475157	0.225813	-2.10421	0.0353603	0.079922
CG10587	0.104697	-0.314725	0.538479	-0.58447	0.558904	NA	0	NA	NA	NA	NA	NA
CG10588	12.6433	-0.585841	0.394165	-1.48628	0.137205	0.18042	57.639	1.25617	0.329692	3.81011	0.000138903	0.000694123
CG10589	27.4215	-1.3424	0.273013	-4.91697	8.78952e-07	2.03414e-06	262.893	1.28752	0.307878	4.18192	2.89056e-05	0.000180034
CG10590	1131.4	-0.0118151	0.0436485	-0.270687	0.786632	0.823137	2036.9	-0.396149	0.0981457	-4.03633	5.42938e-05	0.000309773
CG10591	1.73897	1.08864	0.763167	1.42648	0.153729	0.200055	2.49969	0.0147256	0.565576	0.0260365	0.979228	NA
CG10592	492.657	1.82286	0.0685241	26.6018	6.47044e-156	9.11492e-155	319.285	-1.605	0.246347	-6.5152	7.25938e-11	2.33918e-09
CG10597	52.7718	4.25897	0.318208	13.3842	7.47634e-41	4.10939e-40	2.36113	-1.26444	0.555085	-2.27793	0.022731	NA
CG10598	4.93123	3.62898	0.706366	5.13754	2.7836e-07	6.6269e-07	0.245484	0.235991	0.312042	0.756278	0.449482	NA
CG10600	1420.37	0.116073	0.0378263	3.06857	0.00215088	0.00377358	712.943	0.149757	0.160125	0.935253	0.349658	0.488508
CG10602	3040.38	0.090814	0.0274408	3.30946	0.000934773	0.00170523	3902	-0.267257	0.106165	-2.51737	0.0118233	0.0318377
CG10616	813.707	0.0937683	0.0489801	1.91442	0.0555669	0.0791148	1195.67	0.0156475	0.12111	0.1292	0.897199	0.936435
CG10621	1391.11	-0.947782	0.0396127	-23.9262	1.63472e-126	1.91035e-125	4285.06	-1.00852	0.169221	-5.9598	2.5255e-09	5.64967e-08
CG10623	921.968	-1.02938	0.0500558	-20.5647	5.68621e-94	5.23046e-93	3649.13	0.058001	0.123023	0.471464	0.63731	0.749397
CG10625	26876.9	0.999109	0.0133087	75.0717	0	0	8233.48	-0.332044	0.21906	-1.51576	0.129579	0.228902
CG10628	129.303	0.475792	0.125936	3.77805	0.000158061	0.00031028	212.381	-0.302474	0.203732	-1.48467	0.137631	0.239968
CG10631	3624.17	0.341786	0.0246217	13.8815	8.20212e-44	4.70057e-43	364.956	-0.174478	0.13584	-1.28443	0.198991	0.317721
CG10635	201.512	0.0994172	0.0979473	1.01501	0.310102	0.371962	654.075	-0.0113685	0.131654	-0.086351	0.931187	0.958056
CG10638	552.454	-0.152089	0.0612505	-2.48307	0.0130257	0.0206235	1532.19	-0.242056	0.115266	-2.09998	0.0357304	0.0806561
CG10639	1490.48	0.4229	0.0376909	11.2202	3.24491e-29	1.48834e-28	2334.86	-1.09204	0.162633	-6.71478	1.88351e-11	6.93108e-10
CG10641	1141.78	0.0371885	0.0441772	0.841802	0.399899	0.463177	1448.88	0.185655	0.188373	0.985568	0.324345	0.462397
CG10646	123.69	-0.245701	0.123113	-1.99573	0.0459635	0.0664483	213.257	-0.0280468	0.159461	-0.175886	0.860384	0.912626
CG10650	1085.88	0.53842	0.0447681	12.0269	2.56683e-33	1.2553e-32	2672.88	-0.444172	0.211099	-2.10409	0.0353703	0.0799303
CG10651	1.92086	1.60745	0.747394	2.15075	0.0314963	0.0468748	1.2518	0.344566	0.539343	0.638862	0.522912	NA
CG10654	49.1658	0.598779	0.202054	2.96346	0.00304203	0.00524463	57.4483	-0.270027	0.231019	-1.16885	0.242463	0.370213
CG10657	158.317	0.590402	0.110114	5.36172	8.24315e-08	2.01858e-07	226.742	-0.0611576	0.160989	-0.379886	0.70403	0.800944
CG10659	38.7446	3.13936	0.285236	11.0062	3.56924e-28	1.59997e-27	3.01698	-0.415023	0.566606	-0.732471	0.463881	NA
CG10660	535.027	0.521188	0.0587966	8.86427	7.70089e-19	2.80924e-18	554.269	-0.26084	0.108666	-2.40039	0.0163775	0.0419056
CG10663	68.9013	0.121148	0.160605	0.754324	0.450655	0.514558	23.5201	0.522565	0.377077	1.38583	0.165799	0.277066
CG10669	216.083	0.147631	0.0952183	1.55045	0.121033	0.160918	146.657	0.1928	0.186703	1.03266	0.301765	0.437555
CG10671	364.739	0.575802	0.0724276	7.95004	1.86455e-15	6.21623e-15	555.402	-0.298539	0.127886	-2.33441	0.0195741	0.0486147
CG10672	432.488	0.400645	0.0697447	5.74445	9.22193e-09	2.38288e-08	926.323	-0.917234	0.178537	-5.13751	2.78401e-07	3.41445e-06
CG10673	122.103	0.079713	0.125251	0.636424	0.5245	0.587249	269.194	-0.212571	0.165241	-1.28643	0.198294	0.316933
CG10674	93.6994	0.166495	0.141376	1.17767	0.238929	0.296077	460.061	-0.0981059	0.17584	-0.557926	0.576895	0.69929
CG10680	0.260979	0.115768	0.709117	0.163256	0.870317	NA	0.8809	0.089668	0.490553	0.18279	0.854963	NA
CG10681	89.1005	-0.675977	0.16154	-4.18457	2.85701e-05	5.98432e-05	220.122	0.143419	0.139341	1.02927	0.303353	0.439434
CG10688	299.14	0.0611582	0.0802337	0.76225	0.445911	0.509834	920.592	-0.636399	0.178246	-3.57035	0.000356507	0.001563
CG10694	19.6612	-0.558127	0.314629	-1.77392	0.0760766	0.105434	79.2815	1.21631	0.317327	3.83299	0.000126593	0.000642941
CG10700	3.20894	-0.436415	0.623339	-0.700125	0.483849	0.547574	1.79828	0.165322	0.553085	0.298908	0.76501	NA
CG10702	141.32	0.888608	0.115204	7.71337	1.22541e-14	3.97304e-14	62.902	-0.349926	0.229841	-1.52247	0.127891	0.226532
CG10703	488.692	0.0587095	0.0633476	0.926782	0.35404	0.417913	128.853	-0.152549	0.282938	-0.539158	0.589778	0.710166
CG10710	224.949	3.01535	0.120414	25.0415	2.15956e-138	2.72254e-137	66.8859	-1.48473	0.264898	-5.60492	2.08347e-08	3.63452e-07
CG10713	61.7934	-1.79541	0.198542	-9.04296	1.52486e-19	5.68923e-19	121.196	0.898705	0.322347	2.788	0.0053034	0.0161676
CG10721	190.224	-0.616716	0.101296	-6.08828	1.1413e-09	3.08859e-09	296.306	-0.319688	0.173125	-1.84657	0.0648097	0.131266
CG10725	1355.91	0.872704	0.0399785	21.8293	1.22231e-105	1.23881e-104	2739.13	-0.996551	0.204005	-4.88494	1.03458e-06	1.03288e-05
CG10730	99.4094	0.146322	0.134506	1.08785	0.276663	0.336505	64.3172	0.554408	0.240225	2.30787	0.0210065	0.0514633
CG10731	0	NA	NA	NA	NA	NA	0	NA	NA	NA	NA	NA
CG10732	2141.93	0.740919	0.031524	23.5033	3.77028e-122	4.29396e-121	879.736	0.0364705	0.0996187	0.366101	0.71429	0.807973
CG10734	68.5246	-0.986705	0.172767	-5.71119	1.12192e-08	2.88342e-08	694.64	1.50714	0.261322	5.76736	8.05236e-09	1.58977e-07
CG10737	3914	0.78895	0.0242572	32.5244	4.8144e-232	9.51481e-231	1638.21	-0.296082	0.178812	-1.65583	0.0977562	0.182731
CG10738	264.674	2.07411	0.0943198	21.9902	3.57446e-107	3.66416e-106	48.2965	-0.00429327	0.286899	-0.0149644	0.988061	0.993005
CG1074	369.262	1.16086	0.0751399	15.4493	7.63233e-54	4.99128e-53	270.844	-0.107151	0.146596	-0.730929	0.464823	0.5998
CG10741	618.425	-0.240179	0.0559052	-4.29618	1.73764e-05	3.69848e-05	213.339	0.379273	0.163375	2.32149	0.0202606	0.0499706
CG10747	209.29	0.340738	0.0960819	3.54633	0.000390631	0.000739601	334.027	-0.361526	0.145972	-2.47667	0.0132615	0.0350974
CG10748	18.8276	-0.613004	0.326577	-1.87706	0.0605098	0.0855451	134.355	0.625682	0.263356	2.3758	0.0175109	0.0443133
CG10749	15.4464	-1.18988	0.361801	-3.28877	0.00100626	0.00183041	128.003	1.37716	0.302661	4.55018	5.36009e-06	4.21723e-05
CG10750	14.0667	-1.13295	0.384454	-2.94692	0.0032096	0.00552219	147.879	1.26815	0.301654	4.20398	2.62257e-05	0.000165079
CG10752	12.2806	-0.657027	0.383589	-1.71284	0.0867418	0.118854	71.8492	1.13756	0.347568	3.27291	0.00106447	0.00402853
CG10754	191.738	-0.0337166	0.100711	-0.334786	0.737786	0.781702	573.863	-0.243928	0.117089	-2.08327	0.0372268	0.0833982
CG10761	11.0972	-0.583724	0.396503	-1.47218	0.140972	0.185012	45.3252	1.51254	0.365988	4.13276	3.58437e-05	0.000216946
CG10764	110.966	-0.630796	0.132881	-4.74706	2.06394e-06	4.66486e-06	322.364	1.30379	0.130505	9.99037	1.67952e-23	3.42456e-21
CG1077	5.64539	-0.715785	0.515534	-1.38843	0.165005	0.213304	9.45038	-0.0195234	0.458174	-0.0426113	0.966011	0.980517
CG10777	3052.82	-0.522061	0.0291559	-17.9058	1.06214e-71	8.28443e-71	1234.05	0.00032158	0.155721	0.0020651	0.998352	0.999071
CG10778	245.58	0.203262	0.0895048	2.27097	0.023149	0.0352601	425.847	-0.815623	0.168535	-4.83949	1.30171e-06	1.25413e-05
CG10793	13.343	-0.209645	0.35518	-0.590252	0.555022	0.614562	109.801	1.04773	0.291785	3.59078	0.000329689	0.00146035
CG10795	111.483	-0.134562	0.131315	-1.02473	0.305492	0.36699	279.554	0.0277016	0.135564	0.204344	0.838085	0.89832
CG10799	321.102	-0.83625	0.0793909	-10.5333	6.0655e-26	2.60846e-25	2086.17	-0.28281	0.14567	-1.94144	0.0522049	0.110317
CG10801	81.4784	1.32107	0.16261	8.12419	4.50345e-16	1.52525e-15	48.1296	1.13585	0.311834	3.64249	0.00027001	0.00123425
CG10802	234.205	0.537277	0.0882213	6.0901	1.12841e-09	3.05615e-09	413.16	-0.535534	0.115723	-4.62771	3.69732e-06	3.06991e-05
CG10803	760.569	-0.221165	0.0530998	-4.16508	3.11241e-05	6.49476e-05	781.167	-0.0294364	0.109579	-0.268631	0.788214	0.863619
CG10804	54.6778	0.386012	0.18044	2.13928	0.032413	0.0481164	32.0911	-0.287289	0.307903	-0.93305	0.350794	0.489694
CG10809	269.987	-0.43114	0.0843337	-5.11231	3.18235e-07	7.54811e-07	399.352	0.296577	0.150685	1.96819	0.0490458	0.10469
CG10814	58.2731	2.57974	0.214095	12.0495	1.95124e-33	9.55987e-33	19.9448	-0.281032	0.478439	-0.587394	0.556939	0.681812
CG10822	7.33437	-0.63939	0.470307	-1.35952	0.173983	0.223554	59.5307	1.06776	0.310853	3.43493	0.000592715	0.00240842
CG10824	95.8378	0.722912	0.140826	5.13337	2.84605e-07	6.77077e-07	207.388	-1.2622	0.183943	-6.8619	6.79484e-12	2.69153e-10
CG10827	1636.81	0.134711	0.0353455	3.81127	0.000138256	0.000273037	1181.19	-1.26623	0.248835	-5.08864	3.60644e-07	4.21192e-06
CG10830	187.255	0.158175	0.0991646	1.59508	0.110694	0.148465	182.363	-0.21379	0.156689	-1.36442	0.172434	0.285322
CG10834	2.62379	-0.479771	0.681936	-0.703542	0.481718	0.545714	25.2806	1.31642	0.465939	2.82531	0.00472349	0.014684
CG10839	11.2107	-0.453198	0.398132	-1.13831	0.254991	0.313289	88.7552	1.23351	0.319408	3.86187	0.000112524	0.000578137
CG10841	60.7408	-1.24714	0.18706	-6.66706	2.60978e-11	7.57184e-11	361.143	1.23104	0.246577	4.99252	5.95978e-07	6.45712e-06
CG10845	16.96	-1.49477	0.360786	-4.14309	3.42664e-05	7.12305e-05	130.589	1.37361	0.359069	3.82549	0.000130514	0.00065989
CG10853	0	NA	NA	NA	NA	NA	0.242381	0.177174	0.272587	0.649971	0.515711	NA
CG10858	44.9929	0.663836	0.201272	3.2982	0.000973067	0.00177268	0	NA	NA	NA	NA	NA
CG10859	78.8733	-1.0371	0.165785	-6.25568	3.95782e-10	1.09691e-09	500.708	1.36585	0.28204	4.84276	1.28048e-06	1.2375e-05
CG10862	41.6069	-0.463439	0.214718	-2.15836	0.0309	0.046069	268.12	1.01037	0.286923	3.5214	0.00042927	0.00182339
CG10863	1372.9	1.01139	0.0394596	25.631	6.891e-145	9.07034e-144	3426.71	-0.928382	0.171295	-5.41977	5.96745e-08	9.01861e-07
CG10864	131.015	0.763777	0.128617	5.93839	2.87837e-09	7.62667e-09	1.99227	0.0443347	0.556585	0.0796547	0.936512	NA
CG10866	113.194	0.13864	0.128662	1.07755	0.281233	0.341232	191.863	0.274541	0.166036	1.6535	0.0982288	0.183447
CG10869	134.893	-1.12545	0.123625	-9.10371	8.7294e-20	3.26781e-19	400.842	1.20508	0.304538	3.95709	7.58675e-05	0.000411947
CG10874	514.568	-0.528238	0.0618313	-8.5432	1.30552e-17	4.61345e-17	656.256	0.0789232	0.122007	0.646872	0.517715	0.647234
CG10877	566.822	0.732901	0.0578119	12.6773	7.89765e-37	4.07121e-36	777.71	-0.528901	0.117697	-4.49376	6.99781e-06	5.29433e-05
CG10880	103.625	-0.501679	0.139728	-3.59039	0.000330183	0.000629498	276.863	0.142117	0.161371	0.880686	0.378488	0.517208
CG10881	20.1448	-0.662086	0.303426	-2.18203	0.0291072	0.0435991	116.402	0.783793	0.245929	3.18708	0.00143719	0.00519948
CG10887	39.8805	-0.399371	0.212998	-1.875	0.0607929	0.0859182	130.1	0.436482	0.268951	1.62291	0.104609	0.192788
CG10889	106.15	-0.236125	0.1331	-1.77405	0.0760553	0.105426	114.476	-0.0844913	0.199515	-0.423484	0.671942	0.776111
CG10898	372.92	0.494083	0.0728041	6.78647	1.14914e-11	3.37632e-11	459.127	-0.530273	0.14755	-3.59386	0.000325812	0.00144834
CG10899	9.28326	-0.482929	0.466184	-1.03592	0.30024	0.361391	72.7919	0.991459	0.351104	2.82383	0.00474533	0.0147372
CG1090	211.778	1.00975	0.0966726	10.4451	1.54299e-25	6.57874e-25	118.192	0.0339287	0.226022	0.150112	0.880676	0.924922
CG10903	140.462	0.190463	0.114143	1.66863	0.0951912	0.129481	342.871	-0.236981	0.151577	-1.56344	0.11795	0.212156
CG10904	126.555	-0.0149737	0.123715	-0.121033	0.903665	0.922823	273.073	-0.0601612	0.153427	-0.392115	0.694973	0.793836
CG10907	170.397	-0.0443226	0.103456	-0.428422	0.668344	0.719807	378.884	-0.00585247	0.150255	-0.0389502	0.96893	0.981639
CG10909	7.73203	-0.769283	0.462571	-1.66306	0.096301	0.130819	55.3149	0.980444	0.313609	3.12633	0.00177004	0.00624562
CG1091	1065.23	0.0991726	0.0433397	2.28826	0.0221223	0.0337958	1131.09	0.0164528	0.11139	0.147705	0.882576	0.926291
CG10910	4005.86	1.83243	0.0263644	69.5042	0	0	3377.05	-0.679287	0.228535	-2.97235	0.00295532	0.00973213
CG10911	559.929	1.80006	0.0647515	27.7996	4.39055e-170	6.72034e-169	1901.84	-0.0220822	0.14258	-0.154876	0.876919	0.9223
CG10912	1143.45	-0.798165	0.0453997	-17.5808	3.45411e-69	2.62853e-68	5269.44	0.314913	0.367027	0.858012	0.390886	0.529151
CG10914	107.868	-0.262612	0.138325	-1.89852	0.0576281	0.0817377	109.541	-0.264107	0.190245	-1.38825	0.165062	0.275984
CG10915	604.583	-0.327232	0.0564032	-5.80165	6.56644e-09	1.7112e-08	85.939	0.288899	0.242691	1.1904	0.233889	0.360306
CG10916	378.139	-0.0832084	0.0735981	-1.13058	0.258233	0.316699	901.496	-0.186378	0.14921	-1.2491	0.211628	0.332857
CG10918	1220.89	-1.20696	0.0438512	-27.524	9.05607e-167	1.35679e-165	354.112	-0.18265	0.316859	-0.576437	0.56432	0.688746
CG10919	17.5538	-0.909345	0.34074	-2.66873	0.00761383	0.0124677	152.771	1.24712	0.275424	4.52802	5.95402e-06	4.62934e-05
CG1092	832.453	0.783828	0.0522494	15.0017	7.15966e-51	4.53434e-50	926.644	0.453523	0.164464	2.75758	0.00582316	0.0175042
CG10920	22.3405	-0.848467	0.293867	-2.88725	0.00388622	0.0066177	151.174	1.31598	0.296649	4.43616	9.15792e-06	6.68856e-05
CG10924	2134.45	-2.16374	0.0375697	-57.5926	0	0	4885.88	-0.118744	0.157155	-0.755584	0.449899	0.585212
CG10927	45.4912	0.120773	0.201007	0.600839	0.547947	0.608584	44.2161	0.052701	0.278064	0.189528	0.849679	0.905363
CG10931	14.2174	-1.44423	0.373949	-3.86212	0.000112409	0.000223969	87.7312	0.392045	0.294122	1.33293	0.182554	0.297902
CG10932	2036.77	1.47234	0.0343772	42.8291	0	0	1532.64	-1.03326	0.129847	-7.95752	1.75525e-15	1.2547e-13
CG10933	203.941	-1.08166	0.106779	-10.1299	4.07124e-24	1.68246e-23	394.338	0.191088	0.119637	1.59723	0.110214	0.201209
CG10934	36.0907	-1.47789	0.247015	-5.98299	2.19081e-09	5.83709e-09	298.85	1.26645	0.278659	4.54481	5.49845e-06	4.31481e-05
CG10936	5716.69	0.30099	0.0210296	14.3127	1.82316e-46	1.08799e-45	1903.9	-0.4004	0.105311	-3.80206	0.000143495	0.000714333
CG10943	202.958	1.08331	0.109054	9.93373	2.96928e-23	1.20958e-22	510.698	-0.303177	0.339665	-0.892574	0.372085	0.51111
CG10947	225.502	0.303303	0.0922711	3.28708	0.00101231	0.00184093	139.329	-0.0897153	0.254093	-0.35308	0.724029	0.815787
CG10948	936.79	0.608577	0.0467972	13.0046	1.15256e-38	6.12225e-38	647.865	0.164565	0.177216	0.928613	0.353089	0.49207
CG10949	137.927	-0.308178	0.118208	-2.60708	0.00913181	0.0148072	173.157	0.0806536	0.157615	0.511715	0.608851	0.726416
CG10950	21.6021	-1.14788	0.301529	-3.80687	0.000140735	0.000277689	239.271	1.37482	0.301146	4.56531	4.98762e-06	3.96649e-05
CG10953	2601.35	3.87343	0.0435669	88.9075	0	0	2047.59	-1.07551	0.543728	-1.97803	0.0479252	0.102633
CG10958	147.755	-0.0926184	0.112447	-0.823663	0.410131	0.473437	139.779	0.548826	0.304757	1.80086	0.0717244	0.142327
CG10959	102.196	0.0725684	0.135721	0.534688	0.592866	0.649403	112.933	-0.220396	0.225816	-0.975999	0.329065	0.46728
CG10960	1309.76	-0.937413	0.0418849	-22.3807	6.06795e-111	6.39085e-110	2604.54	0.633898	0.173693	3.64952	0.000262728	0.00120494
CG10962	721.349	-1.64524	0.0581113	-28.3119	2.46812e-176	3.9487e-175	1440.03	-0.571093	0.214008	-2.66856	0.00761767	0.0219987
CG10969	13.7854	-1.17846	0.372232	-3.16593	0.00154587	0.00275494	68.6516	1.30519	0.337058	3.8723	0.000107815	0.000558518
CG10970	124.341	0.50149	0.124621	4.02412	5.71889e-05	0.000116856	139.333	-0.219791	0.210066	-1.0463	0.295425	0.430016
CG10973	173.211	-0.0995524	0.104246	-0.954977	0.33959	0.402802	425.329	-0.128951	0.137358	-0.938791	0.347838	0.486879
CG10979	914.301	0.119556	0.0459029	2.60455	0.00919962	0.0149064	587.797	0.119544	0.121116	0.987018	0.323634	0.46157
CG10984	645.687	-0.530784	0.0602348	-8.81191	1.23028e-18	4.46618e-18	1092.02	0.163195	0.0880517	1.8534	0.0638255	0.129758
CG10993	4.42778	0.125532	0.556782	0.22546	0.821621	0.853965	31.9505	0.571386	0.310801	1.83843	0.0659989	0.133207
CG10996	4.75196	-0.0478213	0.589631	-0.0811038	0.935359	0.94863	46.8111	1.66169	0.367035	4.52733	5.97331e-06	4.63481e-05
CG11000	191.45	1.15442	0.107695	10.7193	8.2596e-27	3.61213e-26	42.8947	-0.139379	0.332336	-0.41939	0.674931	0.778665
CG11007	158.711	0.103289	0.10981	0.940619	0.3469	0.41064	370.566	0.204086	0.170738	1.19532	0.231961	0.357913
CG11018	22.4876	-1.01427	0.300243	-3.37815	0.000729744	0.00134712	230.46	1.42948	0.263547	5.424	5.82793e-08	8.84198e-07
CG11023	21.2138	-0.806868	0.30382	-2.65575	0.00791332	0.0129313	134.49	0.850444	0.29157	2.91677	0.00353674	0.0113846
CG11029	243.145	0.378544	0.0872903	4.3366	1.44701e-05	3.09655e-05	279.989	-1.02974	0.181291	-5.68005	1.34656e-08	2.47759e-07
CG1103	447.953	-0.994293	0.0718189	-13.8444	1.37446e-43	7.85684e-43	1633.98	0.599167	0.159265	3.76208	0.000168507	0.000821597
CG11030	425.07	-0.38223	0.069288	-5.51654	3.45743e-08	8.64132e-08	545.114	-0.24612	0.108266	-2.2733	0.0230082	0.0556763
CG11034	824.281	0.68317	0.0496795	13.7515	4.98518e-43	2.83641e-42	827.177	-0.381721	0.202493	-1.88511	0.0594146	0.122472
CG11035	87.4899	0.542041	0.145053	3.73685	0.000186338	0.000363718	224.265	0.105125	0.167571	0.627345	0.530433	0.658855
CG11037	0.104231	-0.313478	0.537925	-0.582754	0.560059	NA	0	NA	NA	NA	NA	NA
CG1104	1265.35	0.40776	0.040075	10.1749	2.56602e-24	1.06336e-23	1152.86	-0.426544	0.105311	-4.05031	5.11507e-05	0.000294864
CG11041	1.73316	2.17963	0.791251	2.75466	0.0058753	0.00975756	0.490967	0.407889	0.388677	1.04943	0.29398	NA
CG11043	38.6473	0.109283	0.213949	0.510792	0.609497	0.665266	140.528	1.61536	0.256807	6.29015	3.17155e-10	8.90468e-09
CG11044	81.6311	2.30906	0.174317	13.2463	4.73717e-40	2.56912e-39	49.4895	-0.533201	0.335295	-1.59025	0.111779	0.203508
CG1105	1256.13	0.190555	0.0394283	4.83294	1.34531e-06	3.08369e-06	2035.75	-0.547511	0.101726	-5.38221	7.35779e-08	1.08515e-06
CG11050	1408.47	0.967995	0.0380521	25.4387	9.42422e-143	1.21431e-141	1327.58	-1.08294	0.209559	-5.16769	2.36999e-07	2.98943e-06
CG11052	9.61417	-0.489282	0.418388	-1.16944	0.242225	0.299611	60.2861	0.790417	0.28046	2.81829	0.00482803	0.0149377
CG11055	891.424	-0.373871	0.0483436	-7.73362	1.04532e-14	3.39981e-14	680.631	-0.10235	0.0988555	-1.03535	0.300504	0.436083
CG11060	145.153	0.111111	0.119405	0.930541	0.352091	0.415941	140.867	1.46065	0.347151	4.20754	2.58168e-05	0.00016267
CG11068	20.8754	-0.770785	0.300221	-2.56739	0.0102467	0.0164977	217.055	1.39882	0.244706	5.71635	1.08837e-08	2.06675e-07
CG11069	394.826	-0.951901	0.0735179	-12.9479	2.41553e-38	1.27603e-37	451.939	-0.172291	0.122812	-1.40288	0.160652	0.270684
CG11070	853.021	0.0956592	0.0502766	1.90266	0.057085	0.0810443	838.786	0.114157	0.117669	0.970158	0.331968	0.469995
CG11073	1443.55	0.0750904	0.0374583	2.00464	0.0450015	0.0651979	676.415	-0.309461	0.21935	-1.41081	0.158301	0.267739
CG11076	600.802	0.224676	0.0572411	3.92508	8.67017e-05	0.000174769	1139.88	-0.132715	0.103043	-1.28796	0.19776	0.316325
CG11077	126.484	0.709527	0.123922	5.72558	1.0308e-08	2.65687e-08	445.23	0.119255	0.118997	1.00217	0.316263	0.453241
CG11085	5.08336	-1.88356	0.596371	-3.15837	0.00158653	0.00282553	1.32149	0.0855828	0.551885	0.155073	0.876763	NA
CG11089	0	NA	NA	NA	NA	NA	0	NA	NA	NA	NA	NA
CG1109	751.108	-0.0946002	0.0509404	-1.85708	0.0633003	0.0891431	643.944	-0.0651825	0.141903	-0.459344	0.645987	0.755433
CG11092	1000.08	-0.173236	0.0444912	-3.89371	9.87215e-05	0.000197752	969.198	-0.00495675	0.104829	-0.047284	0.962287	0.977933
CG11095	79.698	0.0615157	0.152026	0.404639	0.685743	0.736254	110.009	-1.00004	0.184324	-5.42543	5.78161e-08	8.79116e-07
CG11099	8.10023	3.04264	0.553571	5.49639	3.87652e-08	9.66362e-08	5.34811	0.159958	0.532348	0.300476	0.763814	0.845675
CG11103	77.3817	-0.241899	0.158167	-1.52939	0.126167	0.167038	224.961	-0.300109	0.158246	-1.89647	0.0578984	0.119963
CG11106	21.3289	-0.651407	0.297896	-2.1867	0.0287647	0.0431679	198.653	1.44514	0.28801	5.01769	5.22972e-07	5.77684e-06
CG11107	1462.89	0.253923	0.0371276	6.83919	7.96408e-12	2.35229e-11	1129.05	-0.106046	0.109452	-0.968873	0.332608	0.4707
CG11109	252.855	-0.00759845	0.0856834	-0.0886805	0.929336	0.944302	400.031	-0.164263	0.155561	-1.05594	0.290996	0.425413
CG11110	101.285	0.154532	0.142974	1.08084	0.279767	0.33976	182.448	-0.0360527	0.162996	-0.221188	0.824946	0.888986
CG11112	1.19925	0.869399	0.802729	1.08305	0.278784	0.33872	0	NA	NA	NA	NA	NA
CG11113	0.140458	0.481898	0.571887	0.842645	0.399427	NA	0.121191	0.137331	0.246368	0.557423	0.577239	NA
CG11120	387.702	-0.219304	0.0700839	-3.12916	0.00175304	0.00310601	661.892	-0.194025	0.105782	-1.83419	0.0666252	0.134156
CG11122	1867.16	-0.157315	0.0341198	-4.61066	4.01397e-06	8.90748e-06	46.4002	0.413477	0.31263	1.32258	0.185976	0.302366
CG11123	301.75	-0.0752424	0.079531	-0.946077	0.34411	0.407587	374.216	0.0622909	0.121086	0.514437	0.606946	0.72463
CG11125	109.491	-0.873548	0.139122	-6.27898	3.40796e-10	9.46859e-10	502.482	0.900703	0.267474	3.36744	0.000758683	0.00298524
CG11127	329.611	-0.300619	0.0793951	-3.78637	0.000152865	0.000300607	502.675	-0.357631	0.144292	-2.47852	0.0131927	0.0349576
CG1113	96.5719	-4.26878	0.267472	-15.9597	2.4389e-57	1.65621e-56	112.088	-0.511421	0.23033	-2.22038	0.0263931	0.0622798
CG11131	840.998	2.31853	0.0557538	41.5851	0	0	450.236	-2.44687	0.277886	-8.80532	1.30478e-18	1.54561e-16
CG11134	314.045	0.0319919	0.077666	0.411916	0.680401	0.731395	1051.32	-0.68166	0.149876	-4.54816	5.4117e-06	4.25479e-05
CG11137	193.16	0.156928	0.0974111	1.61098	0.107183	0.144101	875.934	-0.127705	0.110662	-1.15401	0.248495	0.377615
CG11138	1234.74	-0.507854	0.0428537	-11.8509	2.1291e-32	1.02482e-31	372.793	0.280571	0.22794	1.2309	0.218359	0.340644
CG11141	504.41	-0.675958	0.0625476	-10.8071	3.18579e-27	1.40419e-26	545.333	0.349853	0.209884	1.66688	0.0955373	0.179401
CG11145	4.17064	-2.06691	0.646449	-3.19733	0.00138706	0.00248443	49.9999	1.18336	0.321605	3.67955	0.000233642	0.00109086
CG11147	346.194	1.09987	0.0749746	14.6699	1.005e-48	6.18418e-48	122.669	-0.234639	0.229958	-1.02036	0.30756	0.443682
CG11148	7256.92	0.724226	0.0200386	36.1416	5.03941e-286	1.18815e-284	2691.04	0.0349295	0.0985917	0.354284	0.723126	0.81536
CG11149	160.087	1.04286	0.111818	9.32645	1.09478e-20	4.19647e-20	280.627	-0.898083	0.301552	-2.9782	0.00289949	0.00957871
CG1115	349.406	-0.422151	0.0735888	-5.73663	9.65803e-09	2.49173e-08	612.464	-0.139376	0.128549	-1.08423	0.278264	0.412176
CG11151	2039.38	-0.304482	0.0332122	-9.16775	4.8299e-20	1.82482e-19	9287.9	-1.07845	0.16511	-6.53171	6.50244e-11	2.12835e-09
CG11155	2631.34	0.695522	0.0285372	24.3725	3.35065e-131	4.04576e-130	2212.53	0.290813	0.116455	2.49721	0.0125176	0.0333607
CG11158	144.531	0.887873	0.118137	7.51565	5.66296e-14	1.79492e-13	87.8964	-1.35945	0.232707	-5.84191	5.16059e-09	1.07517e-07
CG11159	0.313624	-0.877927	0.728661	-1.20485	0.228262	NA	1.42519	0.180885	0.546421	0.331035	0.740618	NA
CG1116	287.241	-0.0179599	0.0824059	-0.217945	0.827472	0.858861	349.747	-0.161834	0.130021	-1.24468	0.21325	0.334857
CG11160	128.942	1.87995	0.130807	14.3719	7.76332e-47	4.66389e-46	22.3543	-0.487343	0.418927	-1.16331	0.244703	0.372992
CG11162	122.474	0.955942	0.131464	7.27151	3.55495e-13	1.09802e-12	273.886	-1.70106	0.349554	-4.86639	1.13656e-06	1.11928e-05
CG11163	1119.22	0.887403	0.0432432	20.5212	1.39205e-93	1.27524e-92	875.355	0.692671	0.0904047	7.66189	1.83213e-14	1.1394e-12
CG11164	82.7421	-0.353672	0.152186	-2.32394	0.0201285	0.030947	101.247	-0.396391	0.181967	-2.17837	0.0293785	0.0682754
CG11165	8.98048	-1.37767	0.456972	-3.01478	0.00257164	0.00446919	44.3259	1.13147	0.393068	2.87856	0.003995	0.0126566
CG11168	881.811	0.486634	0.0483673	10.0612	8.19852e-24	3.36633e-23	764.278	-0.545938	0.133063	-4.10286	4.08081e-05	0.000242973
CG11170	114.568	-1.59835	0.142431	-11.2219	3.18417e-29	1.46098e-28	227.088	0.185247	0.138035	1.34203	0.179588	0.294219
CG11178	416.061	-0.623433	0.0735728	-8.47368	2.3775e-17	8.31847e-17	153.742	0.00345376	0.167779	0.0205852	0.983577	0.990344
CG11180	332.041	0.57438	0.0755994	7.59768	3.01484e-14	9.6376e-14	350.327	-0.0600416	0.141279	-0.424987	0.670846	0.775679
CG11188	281.039	0.268297	0.0812069	3.30387	0.000953601	0.00173863	284.73	-0.228232	0.155033	-1.47216	0.140979	0.244458
CG11190	468.572	-0.248902	0.0644187	-3.86382	0.000111627	0.000222588	648.866	-0.151275	0.171191	-0.883666	0.376876	0.515686
CG11191	26.3642	-0.563653	0.265787	-2.12069	0.0339475	0.0502445	22.6919	0.49073	0.351866	1.39465	0.163122	0.273733
CG11192	28.6491	1.43299	0.263962	5.42878	5.67404e-08	1.40146e-07	107.653	2.3431	0.377614	6.205	5.46972e-10	1.45058e-08
CG11200	259.296	-0.164927	0.0879927	-1.87432	0.060886	0.0860407	361.89	0.227505	0.147835	1.5389	0.123828	0.220591
CG11208	1525.22	-0.124378	0.0367791	-3.38176	0.00072024	0.00133031	2334.4	-0.497103	0.143449	-3.46537	0.000529497	0.00218437
CG11210	1120.77	-0.0930568	0.0433725	-2.14552	0.031911	0.0474407	1189.86	-0.157758	0.111244	-1.41812	0.156155	0.26501
CG11211	0.421374	0.570959	0.607554	0.939767	0.347337	NA	0	NA	NA	NA	NA	NA
CG11221	475.951	0.0883717	0.0639772	1.3813	0.167187	0.215668	181.04	-0.617865	0.145706	-4.2405	2.23027e-05	0.000144179
CG11226	16.8779	-0.42069	0.3177	-1.32417	0.185446	0.236632	88.7576	1.36461	0.291864	4.67548	2.93261e-06	2.51384e-05
CG11227	18.9087	0.234172	0.302191	0.774915	0.43839	0.502133	59.5471	1.24152	0.341725	3.63309	0.00028005	0.00127173
CG11231	23.7187	2.12419	0.3057	6.94862	3.68878e-12	1.10384e-11	0.753301	0.322704	0.487294	0.662238	0.507818	NA
CG11236	134.877	1.70596	0.126426	13.4937	1.70255e-41	9.45477e-41	220.036	0.54205	0.2102	2.57873	0.00991636	0.0275053
CG1124	753.251	3.56764	0.073349	48.6393	0	0	287.201	0.438198	0.167478	2.61646	0.00888476	0.0250303
CG11241	350.952	0.18514	0.0750557	2.4667	0.0136363	0.0215446	706.364	-0.79961	0.129259	-6.18612	6.16646e-10	1.61131e-08
CG11247	628.675	0.0503731	0.0553535	0.910024	0.36281	0.426616	750.818	0.189936	0.114012	1.66593	0.0957279	0.179641
CG11248	531.301	0.0696377	0.0603235	1.1544	0.248335	0.306181	502.444	0.221421	0.116029	1.90832	0.0563504	0.117421
CG11249	28.6134	-0.911501	0.258696	-3.52345	0.000425969	0.000803903	73.9961	0.912034	0.32333	2.82075	0.00479111	0.01484
CG11251	16.3186	-1.48983	0.367296	-4.0562	4.98773e-05	0.000102352	121.94	1.08437	0.347315	3.12214	0.00179543	0.00631728
CG11253	73.1904	-0.234993	0.163657	-1.43589	0.151033	0.196965	200.201	0.821484	0.275209	2.98495	0.00283626	0.00940231
CG11255	972.245	-0.448984	0.0456441	-9.83664	7.82853e-23	3.15749e-22	2005.99	-0.900554	0.0759843	-11.8518	2.10537e-32	9.02987e-30
CG11257	107.646	-0.101623	0.130578	-0.778255	0.436418	0.500216	138.255	-0.234267	0.156077	-1.50097	0.133363	0.234025
CG1126	3.55111	1.01958	0.621452	1.64064	0.100871	0.136475	2.69682	-0.468608	0.564733	-0.829786	0.40666	NA
CG11261	114.591	-0.310752	0.143545	-2.16484	0.0303998	0.0453886	213.301	-0.138541	0.154508	-0.896659	0.369901	0.508829
CG11262	25.1931	-1.32558	0.289867	-4.57305	4.80677e-06	1.06247e-05	136.474	1.24079	0.293221	4.23159	2.32047e-05	0.00014885
CG11263	21.4721	2.12897	0.322678	6.5978	4.17312e-11	1.20142e-10	34.7094	2.7321	0.362324	7.54047	4.68265e-14	2.7473e-12
CG11266	1995.53	0.244239	0.0335277	7.2847	3.22397e-13	9.97167e-13	456.077	-0.00632017	0.138195	-0.0457338	0.963522	0.978949
CG11267	607.554	0.674782	0.0560212	12.0451	2.05788e-33	1.00787e-32	1649.94	-0.274853	0.109753	-2.50429	0.0122698	0.0328196
CG11269	5.89085	0.535926	0.52985	1.01147	0.311792	0.373654	8.35033	0.904842	0.520621	1.738	0.0822102	0.159124
CG11275	717.114	-1.63903	0.0593326	-27.6245	5.65835e-168	8.55372e-167	1028.96	0.0961908	0.139886	0.687639	0.49168	0.624989
CG11279	72.5944	0.297556	0.159206	1.869	0.0616233	0.0869637	279.629	-0.1814	0.139575	-1.29966	0.193718	0.311743
CG11284	1401.3	0.314171	0.039545	7.94464	1.94758e-15	6.48823e-15	1735.58	-0.641708	0.148169	-4.3309	1.48498e-05	0.000101151
CG11286	3.0448	-0.104207	0.642339	-0.16223	0.871124	0.895787	44.9308	1.45934	0.31589	4.61979	3.84124e-06	3.16826e-05
CG11289	45.0533	1.82596	0.225835	8.08539	6.19645e-16	2.09021e-15	2.73231	0.184765	0.566141	0.326358	0.744154	NA
CG1129	718.792	-0.358105	0.0518158	-6.91112	4.80848e-12	1.43094e-11	1493.64	-0.123203	0.110952	-1.11042	0.266817	0.398878
CG11291	14.8527	0.059841	0.342577	0.174679	0.861332	0.887143	126.526	1.44121	0.270418	5.32959	9.84345e-08	1.40889e-06
CG11294	17.9084	-1.30987	0.339073	-3.86311	0.000111954	0.000223194	43.7948	0.50588	0.359073	1.40885	0.15888	0.268412
CG11298	2.63612	-0.472323	0.700846	-0.673933	0.500354	0.563832	28.5278	1.56946	0.411019	3.81846	0.000134289	0.000675409
CG11300	3212.53	0.0954792	0.0263973	3.61701	0.000298027	0.000570295	14052.9	-1.48912	0.244113	-6.10012	1.05987e-09	2.61043e-08
CG11306	868.328	0.0699042	0.0477248	1.46474	0.142993	0.187463	1672.73	-0.516062	0.0924846	-5.57997	2.40555e-08	4.14982e-07
CG11307	171.656	-0.581174	0.107879	-5.38728	7.15312e-08	1.75742e-07	310.828	-0.116181	0.130522	-0.890124	0.373399	0.512224
CG11309	813.479	0.524227	0.0532665	9.8416	7.45176e-23	3.00824e-22	1937.97	-0.968936	0.21607	-4.48435	7.31361e-06	5.50704e-05
CG11313	300.714	-1.80049	0.0925416	-19.456	2.59009e-84	2.22133e-83	883.71	-1.08488	0.259701	-4.17741	2.94851e-05	0.000183002
CG11317	77.9962	-0.379227	0.155898	-2.43254	0.0149935	0.0235148	78.2414	0.490176	0.203615	2.40737	0.0160678	0.0412064
CG11318	265.447	0.54506	0.0837256	6.51007	7.51139e-11	2.14459e-10	233.397	-0.668741	0.328437	-2.03613	0.0417376	0.0914448
CG11319	178.847	0.395291	0.103156	3.83196	0.000127128	0.000252247	19.9808	-0.00529986	0.358807	-0.0147708	0.988215	0.993005
CG11320	2.55101	-0.725795	0.682583	-1.06331	0.287643	0.348161	3.74353	0.0511124	0.552377	0.0925317	0.926276	0.954587
CG11321	1309.53	3.55613	0.0575002	61.8455	0	0	61.8654	-0.916875	0.28642	-3.20115	0.0013688	0.00497811
CG11322	23.8945	1.01362	0.274343	3.69471	0.000220134	0.000427265	76.4126	1.05383	0.32118	3.28113	0.00103393	0.00392911
CG11327	67.7763	-0.50838	0.171281	-2.96811	0.00299638	0.00517189	496.374	1.23182	0.24149	5.1009	3.38033e-07	3.98905e-06
CG11329	42.6991	-0.620053	0.218093	-2.84307	0.00446811	0.00754169	72.61	-0.295515	0.216815	-1.36298	0.172888	0.285802
CG11333	10.9213	1.02398	0.424916	2.40984	0.0159597	0.0249253	43.3509	-0.0273994	0.277161	-0.0988574	0.921252	0.951152
CG11334	1070.69	0.142006	0.0428605	3.3132	0.000922351	0.00168485	1997.63	-0.758054	0.138988	-5.45408	4.92272e-08	7.6824e-07
CG11337	341.488	0.738519	0.0784557	9.41319	4.81295e-21	1.86133e-20	326.526	-0.269694	0.154547	-1.74507	0.0809734	0.157056
CG11340	246.48	1.24152	0.0913603	13.5892	4.64009e-42	2.60259e-41	133.902	-0.698126	0.269599	-2.58949	0.00961169	0.0268411
CG11342	37.6969	0.312629	0.222293	1.40639	0.159609	0.206966	77.1825	-0.130902	0.210766	-0.621077	0.534549	0.661894
CG11345	122.076	0.0656674	0.122893	0.534346	0.593102	0.649609	273.259	-0.504035	0.184195	-2.73642	0.00621121	0.0184953
CG11349	2502.86	0.541237	0.029654	18.2517	2.00506e-74	1.59067e-73	1701.92	-1.28381	0.15603	-8.22797	1.90415e-16	1.57892e-14
CG11350	20877.9	5.12115	0.0236427	216.606	0	0	1822.32	-1.5317	0.55979	-2.7362	0.00621531	0.0184979
CG11353	39.5588	0.579329	0.216298	2.67838	0.00739791	0.0121362	41.0023	-0.218975	0.323383	-0.677139	0.498318	0.630783
CG11356	0.751371	0.247721	0.81566	0.303706	0.761352	0.801614	0.423743	0.34414	0.363754	0.946078	0.344109	NA
CG11357	1458.8	-0.293062	0.039136	-7.48829	6.97771e-14	2.20643e-13	1023.97	-0.217567	0.0911991	-2.38562	0.0170501	0.0433503
CG1136	262.595	-0.93024	0.0884477	-10.5174	7.18272e-26	3.08103e-25	218.635	0.364654	0.15586	2.33962	0.0193033	0.0480574
CG11360	1919.93	-0.173424	0.0335716	-5.1658	2.39415e-07	5.72304e-07	1496.66	0.282018	0.120956	2.33156	0.0197236	0.0489274
CG11362	11.9745	-0.393922	0.383312	-1.02768	0.3041	0.365546	113.443	1.22485	0.30813	3.97509	7.03512e-05	0.000387009
CG11367	189.626	-0.606172	0.103723	-5.84414	5.09192e-09	1.33601e-08	309.555	-0.113577	0.137454	-0.826287	0.408641	0.546643
CG11368	72.7213	1.24478	0.168735	7.37715	1.6171e-13	5.05755e-13	145.381	-0.582018	0.2037	-2.85723	0.00427354	0.0134228
CG11369	18.2316	-1.29165	0.339023	-3.80992	0.000139012	0.000274491	176.121	1.35168	0.276705	4.88492	1.03471e-06	1.03288e-05
CG1137	36.2997	-0.226498	0.224987	-1.00672	0.314071	0.375883	167.331	1.113	0.31602	3.52194	0.000428408	0.0018211
CG11370	5733.91	2.01972	0.0234889	85.9863	0	0	2461.56	-1.13387	0.220099	-5.15162	2.58241e-07	3.21843e-06
CG11373	5.15468	-0.25645	0.549483	-0.466711	0.640706	0.694447	64.5654	1.22306	0.259034	4.72162	2.33968e-06	2.08059e-05
CG11374	340.345	0.995792	0.0749238	13.2907	2.61981e-40	1.42714e-39	25.5903	0.113504	0.329451	0.344526	0.730451	0.820414
CG11377	405.905	0.414312	0.0687823	6.02352	1.7066e-09	4.57509e-09	588.757	0.0123508	0.116573	0.105949	0.915623	0.946834
CG11378	608.494	1.36579	0.0589267	23.1778	7.62917e-119	8.48044e-118	1064.53	-1.17748	0.233422	-5.04442	4.54907e-07	5.13909e-06
CG11379	6.6923	-0.446572	0.488558	-0.914061	0.360685	0.424506	51.3778	0.948286	0.318357	2.97869	0.00289482	0.00956583
CG1138	16.8569	-1.14669	0.356883	-3.21307	0.00131325	0.00235915	138.116	1.49053	0.28714	5.19095	2.09223e-07	2.6828e-06
CG11380	7.24064	-1.08673	0.501953	-2.165	0.0303875	0.0453804	16.9352	1.73221	0.469533	3.68923	0.000224938	0.00105656
CG11381	1.94759	0.776652	0.719255	1.0798	0.280231	0.340201	0.450743	0.0492322	0.40256	0.122298	0.902663	NA
CG11382	36.9455	-2.42182	0.278827	-8.68573	3.76302e-18	1.34713e-17	45.1303	-0.287376	0.29449	-0.975841	0.329143	0.467338
CG11384	105.959	3.2157	0.181273	17.7396	2.07488e-70	1.60254e-69	17.3471	-1.79515	0.493751	-3.63574	0.000277183	0.00126055
CG11388	175.934	-0.237199	0.106144	-2.23469	0.0254374	0.0385231	313.336	0.123343	0.190145	0.648677	0.516547	0.646004
CG1139	573.776	-0.724743	0.0596463	-12.1507	5.68914e-34	2.8078e-33	911.501	0.69335	0.139818	4.95893	7.08826e-07	7.5033e-06
CG11391	0.50043	0.190188	0.797909	0.238358	0.811603	NA	0.595797	0.58148	0.446922	1.30108	0.193232	NA
CG11395	991.021	-1.41696	0.0505472	-28.0324	6.54514e-173	1.02518e-171	3865.95	-0.768661	0.125831	-6.10867	1.00465e-09	2.49419e-08
CG11396	359.484	0.103991	0.0744251	1.39725	0.162337	0.210097	540.019	0.0565955	0.124594	0.454239	0.649657	0.758306
CG11398	120.089	-0.470513	0.127347	-3.69472	0.000220126	0.000427265	94.8309	0.0912078	0.191894	0.475303	0.634571	0.747636
CG11399	821.177	-0.341336	0.0506741	-6.7359	1.62913e-11	4.75643e-11	427.624	0.45519	0.147309	3.09003	0.00200134	0.00694358
CG1140	1672.15	2.18351	0.0400296	54.5475	0	0	1056.7	-0.98588	0.152324	-6.47225	9.65552e-11	3.02507e-09
CG11400	67.0203	2.19132	0.18672	11.7359	8.34711e-32	3.97931e-31	61.4684	0.610172	0.239887	2.54357	0.0109725	0.0300144
CG11403	257.65	-0.495212	0.0869512	-5.69528	1.23167e-08	3.16066e-08	113.854	-0.156157	0.30654	-0.509417	0.61046	0.727498
CG11404	21.2951	-1.30106	0.306953	-4.23863	2.24886e-05	4.74972e-05	179.456	1.11253	0.323522	3.43882	0.000584259	0.00238051
CG11406	4.86664	0.677265	0.560468	1.20839	0.226897	0.283021	6.54581	2.11712	0.564551	3.75009	0.00017677	0.000856006
CG11407	8.7886	0.832821	0.426263	1.95377	0.0507282	0.0727651	21.059	1.63158	0.394845	4.13221	3.59284e-05	0.000217353
CG11409	216.252	0.757865	0.0926115	8.18328	2.76229e-16	9.40046e-16	72.7443	1.26994	0.258977	4.90368	9.40594e-07	9.48064e-06
CG11412	984.48	-0.0793826	0.0455551	-1.74256	0.0814101	0.112143	704.614	-0.157759	0.208452	-0.756811	0.449163	0.584627
CG11413	27.3309	4.16124	0.413405	10.0658	7.82691e-24	3.21669e-23	11.8362	-0.0560275	0.438692	-0.127715	0.898375	0.937022
CG11414	1305.15	0.0149629	0.0386847	0.38679	0.698911	0.747586	1070.73	-0.101279	0.109829	-0.922152	0.356449	0.495585
CG11417	381.273	0.0497116	0.0711434	0.698753	0.484706	0.548406	48.1801	0.23839	0.281047	0.848221	0.396315	0.534522
CG11418	240.09	0.783731	0.09038	8.6715	4.26451e-18	1.52463e-17	95.693	-0.157146	0.249437	-0.630001	0.528694	0.657261
CG1142	234.878	-0.293186	0.0959286	-3.05629	0.00224092	0.0039249	569.225	-0.0591468	0.1262	-0.468676	0.639301	0.750685
CG11423	196.912	0.55472	0.0997803	5.55941	2.70681e-08	6.80958e-08	133.475	1.11248	0.239681	4.64151	3.45874e-06	2.89696e-05
CG11425	69.1423	1.40931	0.171532	8.21604	2.10339e-16	7.17814e-16	140.519	-0.333973	0.26166	-1.27637	0.201826	0.321382
CG11426	337.545	0.287163	0.0734124	3.91165	9.16691e-05	0.000184229	352.989	-0.307823	0.236677	-1.30061	0.193393	0.311342
CG1143	1475.89	0.617027	0.0382298	16.1399	1.33691e-58	9.21372e-58	970.632	-0.631132	0.205813	-3.06653	0.00216557	0.00741816
CG11436	199.688	-0.127562	0.0977705	-1.30471	0.191992	0.244012	209.954	-0.198858	0.152384	-1.30498	0.191898	0.309697
CG11437	11.916	1.97796	0.411656	4.80489	1.54837e-06	3.53407e-06	3.49627	-0.235556	0.558967	-0.421413	0.673454	0.777321
CG11438	102.598	1.11838	0.142339	7.85714	3.93006e-15	1.29801e-14	38.2595	0.125543	0.356435	0.352219	0.724674	0.816235
CG11444	733.387	-0.345668	0.0538422	-6.42002	1.36259e-10	3.85027e-10	887.158	-0.700111	0.171518	-4.08185	4.46781e-05	0.000261755
CG11447	82.5081	0.047995	0.154048	0.311558	0.755377	0.796822	159.993	-0.155141	0.158701	-0.977568	0.328288	0.466566
CG11448	1160.99	0.34056	0.041263	8.25338	1.5397e-16	5.27589e-16	491.465	-0.0269782	0.144318	-0.186936	0.851711	0.906805
CG11449	0.286588	0.910137	0.711837	1.27858	0.201046	NA	0	NA	NA	NA	NA	NA
CG11453	523.163	1.25179	0.0618497	20.2392	4.42408e-91	3.99833e-90	463.544	-0.74678	0.169444	-4.40725	1.04693e-05	7.53135e-05
CG11454	254.041	-0.104679	0.0864832	-1.21039	0.226128	0.282114	541.807	-0.395756	0.117291	-3.37415	0.000740454	0.00292745
CG11455	756.343	0.777985	0.0539647	14.4166	4.07094e-47	2.45554e-46	2604.12	-0.671162	0.159876	-4.19803	2.69251e-05	0.000169053
CG11456	216.844	0.044562	0.0992008	0.44921	0.65328	0.706139	181.366	0.0740974	0.147676	0.501755	0.61584	0.731667
CG11458	0	NA	NA	NA	NA	NA	0	NA	NA	NA	NA	NA
CG11459	271.269	-7.64765	0.442328	-17.2895	5.63934e-67	4.23392e-66	3136.08	2.18589	0.165246	13.2281	6.04091e-40	3.75684e-37
CG1146	521.052	0.147918	0.0611515	2.41887	0.0155686	0.0243485	438.092	0.180136	0.23228	0.775514	0.438036	0.574057
CG11470	466.483	0.736581	0.0665804	11.063	1.89563e-28	8.56602e-28	1081.24	-0.176351	0.342017	-0.515621	0.606119	0.724338
CG11474	997.734	-0.13385	0.0438792	-3.05041	0.00228527	0.00399789	2071.15	-0.440939	0.12654	-3.48458	0.000492902	0.00205178
CG11475	78.8729	0.0312411	0.153283	0.203814	0.838499	0.868552	102.115	0.814343	0.209474	3.88757	0.000101254	0.000529602
CG11486	4007.95	-0.293585	0.0248631	-11.8081	3.54633e-32	1.70029e-31	2916.32	-0.148226	0.128998	-1.14906	0.250533	0.380231
CG11498	19.2672	-1.23265	0.33197	-3.71313	0.000204712	0.000398656	13.6912	-0.224509	0.444844	-0.504691	0.613776	0.730051
CG11504	224.77	-0.286461	0.0972417	-2.94587	0.00322052	0.00554026	293.924	0.307636	0.186408	1.65033	0.0988745	0.184544
CG11505	6339.47	-0.0263631	0.0200215	-1.31674	0.187926	0.239546	1206.51	0.222137	0.139819	1.58874	0.112118	0.203937
CG11509	271.653	-1.30671	0.0897915	-14.5527	5.616e-48	3.42128e-47	125.941	0.926346	0.177349	5.2233	1.75764e-07	2.29879e-06
CG11523	145.365	0.330444	0.114454	2.88713	0.00388775	0.00661947	290.73	0.0183402	0.183274	0.10007	0.920289	0.950631
CG11526	1418.07	-0.490742	0.0386284	-12.7042	5.60537e-37	2.89399e-36	1340.11	0.186327	0.124829	1.49266	0.135526	0.237219
CG11529	956.55	-1.97979	0.0525832	-37.6507	0	0	1270.74	0.575686	0.38774	1.48472	0.137618	0.239968
CG11534	267.573	-0.405598	0.0849725	-4.77329	1.81242e-06	4.11855e-06	411.753	-0.0310552	0.113783	-0.272934	0.784904	0.861721
CG11537	1537.89	0.259837	0.0365418	7.1107	1.15457e-12	3.51284e-12	1241.28	-0.212955	0.0974707	-2.18481	0.0289026	0.0672321
CG11539	44.4321	0.182004	0.21288	0.854963	0.392572	0.456066	88.2805	-0.185644	0.198032	-0.937442	0.348531	0.487416
CG11550	144.906	0.31392	0.114383	2.74447	0.00606081	0.0100408	354.924	-0.174117	0.136832	-1.27249	0.203199	0.322741
CG11555	162.833	0.294355	0.105346	2.79419	0.00520299	0.00870121	404.377	-0.255611	0.174236	-1.46704	0.142366	0.246313
CG11560	128.031	-0.302459	0.123013	-2.45876	0.0139419	0.0219808	237.366	0.120118	0.18236	0.658688	0.510096	0.640447
CG11562	181.871	0.638153	0.10117	6.30771	2.83186e-10	7.89244e-10	428.995	0.333618	0.146287	2.28057	0.0225738	0.0547743
CG11563	130.496	0.0532753	0.121455	0.438642	0.660921	0.71285	333.354	-0.188196	0.169849	-1.10802	0.267853	0.399947
CG11566	0	NA	NA	NA	NA	NA	0	NA	NA	NA	NA	NA
CG11570	0.908752	0.476817	0.81151	0.587568	0.556823	0.61615	0.991329	-0.710596	0.454266	-1.56427	0.117753	NA
CG11576	495.11	-0.12726	0.0615523	-2.06751	0.0386859	0.0566895	697.045	-0.315906	0.0984867	-3.2076	0.00133848	0.00488497
CG11577	285.037	-0.226992	0.0841049	-2.69891	0.00695663	0.0114459	669.735	0.12587	0.135097	0.931699	0.351492	0.490229
CG11581	3.63057	2.27289	0.662889	3.42876	0.000606335	0.00112845	0.557552	0.159875	0.424275	0.37682	0.706307	NA
CG11583	218.332	0.247997	0.10074	2.46177	0.0138255	0.021823	524.858	0.073651	0.159173	0.46271	0.643572	0.753459
CG11584	6.30723	-0.796111	0.530585	-1.50044	0.133501	0.175939	10.6827	0.445516	0.497407	0.895677	0.370425	0.509404
CG11585	139.756	4.20807	0.197941	21.2592	2.71032e-100	2.63942e-99	23.9552	-0.869514	0.370321	-2.348	0.0188743	0.0471688
CG11586	165.882	0.223802	0.106571	2.10003	0.0357264	0.0526859	421.143	0.176188	0.125029	1.40918	0.158781	0.268368
CG11588	17.5265	-1.56972	0.346913	-4.52482	6.04471e-06	1.32737e-05	238.213	1.33008	0.312724	4.25319	2.10745e-05	0.000137045
CG11590	173.053	-0.805307	0.107861	-7.46615	8.25748e-14	2.60743e-13	713.503	-0.274746	0.148122	-1.85487	0.0636154	0.129437
CG11592	186.677	1.22564	0.103106	11.8872	1.37949e-32	6.65674e-32	223.913	-0.227065	0.204153	-1.11223	0.266039	0.398051
CG11593	724.538	-0.18548	0.0513785	-3.61008	0.000306102	0.000585081	790.04	0.205701	0.111599	1.84322	0.0652975	0.132125
CG11594	1291.74	-0.556994	0.0418284	-13.3162	1.86454e-40	1.01777e-39	2015.39	-1.15888	0.187555	-6.17889	6.45524e-10	1.67971e-08
CG11596	346.48	-0.446253	0.0742505	-6.0101	1.85411e-09	4.96263e-09	669.728	-0.263009	0.13832	-1.90146	0.0572424	0.118861
CG11597	163.515	0.182347	0.109732	1.66175	0.0965638	0.131136	158.925	0.494288	0.207629	2.38063	0.0172831	0.0438439
CG11598	3.54762	0.398774	0.607085	0.656867	0.511267	0.574587	3.5854	0.00952155	0.566409	0.0168104	0.986588	0.992308
CG11600	0.929732	-0.609776	0.80891	-0.753824	0.450955	0.514814	0.208367	-0.180497	0.261761	-0.689548	0.490478	NA
CG11601	138.058	0.129579	0.118192	1.09634	0.272929	0.332448	248.783	-0.126023	0.1567	-0.804227	0.421266	0.558545
CG11608	0	NA	NA	NA	NA	NA	0.205259	-0.179958	0.261374	-0.688509	0.491133	NA
CG1161	615.846	-0.00822852	0.0576202	-0.142806	0.886443	0.909105	1849.16	-0.081463	0.129925	-0.626998	0.53066	0.658981
CG11617	66.5227	2.87324	0.218997	13.12	2.52933e-39	1.36021e-38	37.6211	-0.183609	0.387699	-0.473587	0.635795	0.748358
CG11619	118.882	1.03773	0.135529	7.65688	1.90505e-14	6.13955e-14	51.6238	0.337531	0.295464	1.14238	0.253298	0.383414
CG11626	6.48279	-0.0188161	0.49307	-0.0381611	0.969559	0.977267	6.78359	-0.615907	0.506105	-1.21695	0.223622	0.347633
CG11629	2.65144	-0.265933	0.658235	-0.404009	0.686206	0.736635	9.48383	0.190146	0.513442	0.370335	0.711133	0.805709
CG11630	75.8278	1.59404	0.173326	9.19678	3.68846e-20	1.39671e-19	77.1666	0.962481	0.382629	2.51544	0.0118883	0.0319692
CG11634	5.06314	-0.636047	0.541309	-1.17502	0.239988	0.297171	56.9091	1.41396	0.380774	3.71339	0.0002045	0.000973802
CG11635	75.8601	0.305687	0.154758	1.97526	0.0482392	0.0694841	92.0498	1.20321	0.306433	3.92651	8.61872e-05	0.000459887
CG11638	38.7542	-0.115442	0.219744	-0.525348	0.599342	0.655641	52.0842	0.235224	0.270064	0.870994	0.383758	0.522249
CG11652	710.598	0.123563	0.053015	2.33071	0.0197685	0.0304387	997.126	-0.0730461	0.278617	-0.262174	0.793187	0.867387
CG11655	117.411	0.396224	0.125668	3.15294	0.00161637	0.00287561	176.271	-0.583745	0.214083	-2.72672	0.00639677	0.01893
CG11656	25.2103	-1.44991	0.295795	-4.90174	9.49895e-07	2.19369e-06	159.033	1.23904	0.270489	4.58074	4.63338e-06	3.73978e-05
CG11658	715.224	-0.966284	0.0549474	-17.5856	3.17613e-69	2.4211e-68	771.663	0.388967	0.208365	1.86676	0.0619355	0.126661
CG11659	156.25	4.07607	0.179835	22.6656	9.78332e-114	1.0552e-112	165.085	-1.09644	0.198835	-5.51429	3.50193e-08	5.70118e-07
CG11660	244.581	0.532668	0.0897	5.93833	2.87945e-09	7.62802e-09	231.111	-0.197637	0.157908	-1.25159	0.210719	0.331889
CG11663	5.21975	-0.866292	0.551078	-1.572	0.115952	0.154821	79.2712	1.04289	0.31965	3.2626	0.00110395	0.00415458
CG11664	0	NA	NA	NA	NA	NA	0	NA	NA	NA	NA	NA
CG11665	1296.26	-0.511838	0.0396255	-12.9169	3.61407e-38	1.90394e-37	2003.48	-0.0295973	0.087125	-0.33971	0.734075	0.82308
CG11666	0.703219	-0.262845	0.815938	-0.322138	0.747348	0.789696	10.6829	1.2646	0.470819	2.68596	0.00723209	0.0210268
CG11668	145.202	-0.906239	0.117658	-7.70235	1.33586e-14	4.32178e-14	239.543	-0.114517	0.269415	-0.425057	0.670795	0.775679
CG11670	138.409	-0.0368074	0.11748	-0.313307	0.754047	0.795669	314.186	-0.319624	0.142724	-2.23946	0.0251258	0.0599377
CG11671	38.2381	2.39022	0.254922	9.3763	6.83274e-21	2.63185e-20	42.9733	0.114892	0.316841	0.362618	0.71689	0.81011
CG11672	233.459	-0.00345912	0.0928405	-0.0372587	0.970279	0.977699	831.351	-1.63956	0.153772	-10.6623	1.52754e-26	3.95824e-24
CG11674	0.468684	-0.419327	0.79746	-0.525828	0.599008	NA	1.0974	0.539118	0.514849	1.04714	0.295036	NA
CG11679	203.781	-0.240897	0.1009	-2.38749	0.0169639	0.0264108	334.161	-0.678954	0.13013	-5.21752	1.81331e-07	2.36662e-06
CG11686	201.326	-0.57086	0.0970282	-5.88344	4.01819e-09	1.0578e-08	1075.69	-0.111731	0.127853	-0.873901	0.382172	0.520927
CG11693	0.110357	-0.329479	0.544953	-0.6046	0.545444	NA	0.205259	-0.179958	0.261374	-0.688509	0.491133	NA
CG11694	5.04108	-0.786695	0.541542	-1.45269	0.146309	0.191381	12.9225	0.619392	0.461132	1.3432	0.179208	0.29379
CG11695	143.944	0.201252	0.114797	1.75311	0.0795831	0.109884	83.0033	-0.151191	0.318369	-0.474894	0.634863	0.747838
CG11696	259.732	0.0875695	0.0846997	1.03388	0.301192	0.362406	114.866	-0.302763	0.302156	-1.00201	0.316339	0.453298
CG11697	14.8755	-0.879164	0.352268	-2.49572	0.0125701	0.0199586	128.513	0.992914	0.312963	3.17262	0.0015107	0.00543224
CG11698	3.41338	-0.754095	0.628342	-1.20013	0.230087	0.286621	18.1518	1.05688	0.419594	2.51882	0.0117748	0.0317346
CG11699	418.898	0.209814	0.067441	3.11107	0.0018641	0.00329409	673.965	-0.578168	0.22144	-2.61094	0.00902925	0.0253741
CG11700	56.9374	-0.818295	0.185877	-4.40234	1.0709e-05	2.31344e-05	208.324	-0.0768795	0.228795	-0.336019	0.736856	0.825454
CG11703	17.3641	-1.04356	0.342139	-3.0501	0.00228764	0.00400099	141.482	1.27971	0.302975	4.22381	2.40208e-05	0.00015298
CG11710	319.512	0.190596	0.0777239	2.45222	0.0141979	0.0223556	168.279	-0.235681	0.156884	-1.50227	0.133028	0.233536
CG11714	42.7582	-1.06049	0.222723	-4.76149	1.92166e-06	4.35648e-06	189.904	1.5247	0.289372	5.26901	1.37161e-07	1.86653e-06
CG1172	482.466	-0.934332	0.0657785	-14.2042	8.62598e-46	5.09111e-45	749.214	0.713417	0.1904	3.74693	0.00017901	0.000865051
CG11722	74.5162	0.424175	0.159019	2.66746	0.00764281	0.012509	241.09	0.287608	0.184388	1.55979	0.118809	0.213331
CG11723	225.383	-0.670674	0.0958217	-6.99919	2.5745e-12	7.73673e-12	436.217	-0.304245	0.119118	-2.55416	0.0106444	0.0292715
CG11726	9.21133	-1.20708	0.444588	-2.71506	0.00662635	0.0109252	83.6172	1.58004	0.3784	4.17557	2.97236e-05	0.000184206
CG11737	784.861	-1.45317	0.053854	-26.9836	2.30286e-160	3.3135e-159	2210.78	0.438301	0.12302	3.56284	0.00036687	0.00160448
CG11739	1374.45	0.527194	0.0393701	13.3907	6.85248e-41	3.77111e-40	2429.43	-0.199997	0.0773738	-2.58482	0.00974307	0.0271349
CG11741	7.31398	-1.33911	0.503054	-2.66196	0.0077687	0.0127074	27.2749	0.907717	0.332691	2.72841	0.00636411	0.0188558
CG11752	216.505	0.685766	0.0976246	7.02452	2.14805e-12	6.47402e-12	777.621	-1.01927	0.130761	-7.79487	6.44749e-15	4.26563e-13
CG11753	148.437	-0.351625	0.114635	-3.06733	0.00215981	0.00378778	355.963	-0.277588	0.141331	-1.9641	0.0495184	0.105572
CG11755	42.8446	0.597959	0.206608	2.89417	0.00380168	0.0064836	98.7575	-0.161128	0.203567	-0.791522	0.428639	0.565008
CG11756	6.87962	0.186903	0.48904	0.382184	0.702325	0.75047	74.8435	1.28412	0.333056	3.85557	0.00011546	0.000591961
CG11760	21.3766	0.303169	0.2932	1.034	0.301137	0.362373	27.3466	0.442458	0.311104	1.42222	0.154962	0.263602
CG11762	14.6858	0.00931527	0.345276	0.0269792	0.978476	0.9836	26.4192	0.718954	0.354817	2.02627	0.0427371	0.093306
CG11768	0.697522	1.08225	0.814106	1.32937	0.183725	0.234726	0.121191	0.137331	0.246368	0.557423	0.577239	NA
CG11771	1106.49	0.739838	0.0426066	17.3644	1.53539e-67	1.15597e-66	719.526	-0.198015	0.142462	-1.38995	0.164544	0.27544
CG11777	71.1399	-0.203232	0.159784	-1.27192	0.203402	0.256692	263.392	-0.053589	0.148608	-0.360606	0.718394	0.811432
CG11779	566.499	1.03976	0.0602039	17.2707	7.82214e-67	5.85963e-66	600.017	0.299131	0.164719	1.81601	0.0693687	0.138782
CG11781	80.594	0.317283	0.156166	2.03171	0.042183	0.0613953	415.879	-0.212478	0.121459	-1.74938	0.0802245	0.15596
CG11786	4.56608	0.549435	0.550552	0.99797	0.318294	0.380328	17.8043	0.595998	0.39047	1.52636	0.12692	0.224973
CG11788	93.4182	-0.0297859	0.139452	-0.213593	0.830865	0.861906	129.678	-0.469855	0.162792	-2.88622	0.00389894	0.0123933
CG11790	856.938	0.46757	0.0474389	9.85625	6.44073e-23	2.60478e-22	1689.9	-0.389887	0.128436	-3.03566	0.00240008	0.00812304
CG11791	1247.11	0.765108	0.0404317	18.9235	7.31034e-80	6.06817e-79	1764.13	-0.0493345	0.127058	-0.388284	0.697806	0.795975
CG11796	673.244	5.0475	0.113541	44.4554	0	0	110.028	-1.20182	0.453374	-2.65084	0.00802926	0.0230359
CG11802	166.676	-0.158348	0.107727	-1.4699	0.141588	0.18573	51.1377	-0.0706274	0.301585	-0.234188	0.814839	0.88231
CG11807	537.264	0.0544206	0.0612141	0.889021	0.373992	0.437926	727.662	-0.135526	0.109023	-1.2431	0.213832	0.335559
CG11808	68.5108	-0.442727	0.166749	-2.65505	0.00792955	0.0129563	240.87	0.0262398	0.164174	0.159829	0.873016	0.920488
CG11811	629.819	0.238439	0.0558364	4.27032	1.9519e-05	4.13812e-05	980.828	-0.0643303	0.134657	-0.477736	0.632838	0.746089
CG11815	12.3017	-0.0743258	0.369426	-0.201193	0.840548	0.869802	104.63	0.854673	0.253787	3.36767	0.000758053	0.00298375
CG11816	6.14401	1.03903	0.508963	2.04146	0.0412054	0.0600997	13.5715	1.60801	0.524023	3.06858	0.00215076	0.00737562
CG11825	28.4011	1.93159	0.277156	6.96932	3.18478e-12	9.54722e-12	86.4897	-0.555834	0.401436	-1.38461	0.166171	0.27739
CG11828	11.2933	0.386051	0.383554	1.00651	0.314169	0.375968	1.25801	0.3466	0.539255	0.642739	0.520393	NA
CG11835	1512.46	1.99859	0.0404505	49.4082	0	0	651.186	0.0760754	0.133808	0.568539	0.569669	0.693437
CG11836	80.1332	0.174572	0.153417	1.13789	0.255166	0.31343	116.533	0.242774	0.186862	1.29922	0.19387	0.311948
CG11837	100.193	0.0205945	0.14815	0.139011	0.889441	0.911623	199.861	-0.175542	0.158478	-1.10767	0.268003	0.400123
CG11839	84.9245	-0.0837343	0.147923	-0.566065	0.57135	0.629323	199.233	0.0545158	0.155677	0.350185	0.7262	0.817344
CG11841	5.86647	-1.06574	0.537595	-1.98243	0.0474314	0.0684264	12.3954	-0.27319	0.434695	-0.628463	0.529701	0.658315
CG11842	18.0546	-0.623562	0.330445	-1.88704	0.0591554	0.0837536	19.0271	-0.23234	0.381593	-0.608867	0.542612	0.668984
CG11843	30.2623	2.14334	0.276705	7.74596	9.48653e-15	3.08841e-14	29.3489	0.551038	0.322169	1.7104	0.0871915	0.166614
CG11851	539.146	0.198561	0.061821	3.21187	0.00131874	0.00236805	660.896	0.0248772	0.145486	0.170994	0.864228	0.91491
CG11852	868.557	1.1876	0.0481693	24.6548	3.27136e-134	4.00398e-133	778.1	-0.943481	0.197098	-4.78686	1.69409e-06	1.57157e-05
CG11854	4507.04	-5.06521	0.051794	-97.7953	0	0	13634.2	-0.753848	0.209362	-3.60069	0.000317377	0.00141489
CG11857	1373.84	0.0994048	0.0394208	2.52164	0.0116811	0.0186329	2920.28	-0.329492	0.114905	-2.86752	0.00413696	0.0130465
CG11858	161.234	-0.327049	0.109112	-2.99737	0.00272321	0.0047204	541.218	-0.314228	0.13517	-2.32469	0.0200884	0.0496738
CG11859	431.593	0.444098	0.0762077	5.82747	5.62752e-09	1.47251e-08	454.428	-0.0295899	0.12043	-0.245702	0.805913	0.876449
CG11864	0	NA	NA	NA	NA	NA	0	NA	NA	NA	NA	NA
CG11865	6.88207	-3.71909	0.689711	-5.39224	6.95833e-08	1.71144e-07	7.00294	0.611608	0.543617	1.12507	0.260559	0.391894
CG11866	764.02	-0.539262	0.0510475	-10.5639	4.37946e-26	1.89064e-25	623.733	0.125634	0.117423	1.06992	0.284654	0.419088
CG11873	4876.76	-0.501575	0.0221994	-22.594	4.95893e-113	5.32718e-112	853.655	0.14206	0.10992	1.2924	0.196218	0.314546
CG11875	85.8739	-0.0472828	0.156519	-0.302089	0.762584	0.802598	175.84	-0.195006	0.18195	-1.07176	0.28383	0.418229
CG11876	2502.87	1.22228	0.0303851	40.2263	0	0	1443.81	-1.0677	0.209738	-5.09064	3.56851e-07	4.17939e-06
CG11877	353.371	0.0701185	0.0755818	0.927716	0.353555	0.417414	282.382	-0.18413	0.246354	-0.747418	0.454812	0.590557
CG11878	23.3105	0.808931	0.280965	2.87911	0.00398795	0.00677462	35.9018	0.210048	0.405433	0.518082	0.604401	0.72298
CG11880	2152.2	-0.400211	0.0319581	-12.523	5.58918e-36	2.83766e-35	1607.88	0.429507	0.2332	1.8418	0.0655051	0.132459
CG11882	199.072	-1.78826	0.111767	-15.9999	1.28002e-57	8.72322e-57	469.979	0.2121	0.171286	1.23828	0.215613	0.337554
CG11883	443.271	0.748491	0.0657693	11.3805	5.2271e-30	2.42901e-29	221.34	-0.231862	0.141637	-1.63701	0.101628	0.18858
CG11885	132.328	-1.09553	0.126168	-8.68306	3.85268e-18	1.37886e-17	476.656	0.0771538	0.132984	0.580172	0.561799	0.686815
CG11889	0	NA	NA	NA	NA	NA	0	NA	NA	NA	NA	NA
CG11891	0	NA	NA	NA	NA	NA	0	NA	NA	NA	NA	NA
CG11892	1799.5	-0.433191	0.0338001	-12.8162	1.33e-37	6.9521e-37	9085.43	0.177949	0.122171	1.45656	0.145238	0.25055
CG11893	856.105	2.41508	0.056896	42.4472	0	0	1463.4	0.108491	0.273965	0.396005	0.692101	0.791719
CG11897	715.361	0.357537	0.0525073	6.80928	9.80889e-12	2.88829e-11	376.355	0.0465095	0.11692	0.397788	0.690786	0.790651
CG11898	231.445	1.05189	0.0944085	11.1419	7.8454e-29	3.57405e-28	18.5744	-1.71013	0.549226	-3.11371	0.00184751	0.00647489
CG11899	395.518	-2.547	0.089631	-28.4165	1.26521e-177	2.04365e-176	1722.07	1.36933	0.187314	7.31036	2.66431e-13	1.39238e-11
CG11902	471.051	0.0669423	0.0665171	1.00639	0.314227	0.376004	274.706	0.0973597	0.141405	0.688518	0.491127	0.624477
CG11905	139.792	-2.18991	0.140417	-15.5957	7.78345e-55	5.13005e-54	270.76	1.00107	0.289662	3.45599	0.000548269	0.0022521
CG11906	239.294	0.205205	0.0912049	2.24994	0.0244529	0.0371158	152.433	-0.102075	0.194962	-0.523563	0.600583	0.719563
CG11911	4097.8	0.646197	0.0248229	26.0323	2.13702e-149	2.8951e-148	22418.5	-1.8165	0.299102	-6.07319	1.25392e-09	3.0284e-08
CG11912	2407.9	-3.23214	0.0430541	-75.0716	0	0	29918.8	-0.117258	0.161705	-0.725135	0.468369	0.602999
CG11913	32.8055	-1.35027	0.253953	-5.317	1.05495e-07	2.56791e-07	162.494	1.11722	0.331509	3.3701	0.000751417	0.00296138
CG11920	110.625	-0.152433	0.13084	-1.16503	0.244009	0.301428	328.303	-0.209972	0.167783	-1.25145	0.210771	0.331928
CG11926	363.057	0.0535775	0.0747818	0.716451	0.473713	0.537734	489.338	-0.0997702	0.108429	-0.920144	0.357498	0.4966
CG11927	260.981	-0.354193	0.0861031	-4.1136	3.89545e-05	8.06764e-05	134.075	0.29871	0.208594	1.43201	0.15214	0.259899
CG11929	68.8181	-0.441072	0.167258	-2.63707	0.00836261	0.0136324	335.659	1.03462	0.253554	4.08046	4.4947e-05	0.000263083
CG11951	47.0203	0.425078	0.206602	2.05748	0.0396405	0.0579747	42.5922	-0.788909	0.310984	-2.53682	0.0111866	0.0304318
CG11961	2533.38	1.15722	0.0298247	38.8008	0	0	1680.74	-1.11767	0.188098	-5.94195	2.81655e-09	6.25576e-08
CG11964	423.275	-0.0565838	0.0681681	-0.830064	0.406503	0.469854	607.88	-0.165785	0.105093	-1.57751	0.114679	0.207413
CG11966	22.2808	-0.797558	0.291823	-2.73302	0.00627571	0.0103764	28.1315	1.5462	0.54225	2.85145	0.00435201	0.0136452
CG11970	901.55	-0.056036	0.0483129	-1.15986	0.246107	0.303741	356.921	0.0963129	0.135044	0.713196	0.475724	0.610069
CG11975	345.665	-0.735846	0.0758063	-9.70693	2.81686e-22	1.12432e-21	861.561	-0.0253598	0.109262	-0.2321	0.81646	0.882978
CG11977	0.396945	0.481911	0.775933	0.621073	0.534552	NA	0	NA	NA	NA	NA	NA
CG11980	503.178	0.198883	0.0651232	3.05394	0.00225856	0.00395322	1101.35	-0.143633	0.123087	-1.16691	0.243245	0.37127
CG11982	408.226	-0.271384	0.0690802	-3.92853	8.54669e-05	0.000172409	731.697	0.028531	0.134059	0.212825	0.831463	0.893686
CG11983	34.8351	-0.933765	0.238229	-3.91961	8.86924e-05	0.000178541	128.793	0.682365	0.268171	2.54451	0.010943	0.0299405
CG11984	1511.25	-0.172762	0.0368266	-4.69122	2.7158e-06	6.08903e-06	303.04	0.37254	0.142929	2.60646	0.00914831	0.0256689
CG11985	67.2957	-0.13193	0.165175	-0.798726	0.424449	0.488329	482.13	-0.139784	0.135844	-1.029	0.303478	0.439476
CG11986	103.557	-0.411406	0.141236	-2.9129	0.00358084	0.00612796	258.692	0.176744	0.16033	1.10238	0.270297	0.402871
CG11997	0.438391	0.574652	0.608881	0.943785	0.345279	NA	0.205259	-0.179958	0.261374	-0.688509	0.491133	NA
CG11999	344.697	0.0792683	0.0820769	0.965781	0.334154	0.39695	595.12	-0.350362	0.104915	-3.3395	0.000839307	0.00326636
CG12001	178.542	-0.915841	0.108716	-8.42417	3.63314e-17	1.26721e-16	301.86	-0.236701	0.12862	-1.84031	0.065723	0.132748
CG12003	1.01935	-0.741408	0.807274	-0.91841	0.358404	0.42236	0.571299	-0.208673	0.418395	-0.498747	0.617958	NA
CG12004	2102.78	-0.343631	0.0318638	-10.7844	4.0798e-27	1.79471e-26	2865.17	-0.0125546	0.126644	-0.0991326	0.921033	0.951005
CG12006	994.854	0.107097	0.0465325	2.30154	0.0213609	0.032725	1210.52	0.0198859	0.110806	0.179466	0.857572	0.910886
CG12007	454.096	-0.293421	0.0658729	-4.45435	8.41475e-06	1.82957e-05	619.561	-0.353008	0.164137	-2.15068	0.0315011	0.0723833
CG12009	124.292	-1.80077	0.139978	-12.8647	7.11126e-38	3.73168e-37	127.537	0.580808	0.288702	2.01179	0.0442424	0.0959357
CG12010	151.716	0.179937	0.110389	1.63003	0.103096	0.139093	143.504	-0.176274	0.186588	-0.944721	0.344802	0.484054
CG12011	12.761	-0.478805	0.364991	-1.31183	0.189578	0.241263	2.39359	-0.496971	0.563105	-0.882554	0.377477	NA
CG12012	319.167	-0.91675	0.0830302	-11.0412	2.41879e-28	1.09081e-27	1234.22	-0.0100601	0.0811042	-0.124039	0.901285	0.938719
CG12014	38.5542	-0.864187	0.227993	-3.79041	0.000150398	0.000295974	60.1363	0.939372	0.265465	3.53859	0.000402271	0.00173099
CG12016	0	NA	NA	NA	NA	NA	0	NA	NA	NA	NA	NA
CG12017	26.2848	0.87572	0.270777	3.23411	0.00122024	0.0022006	10.845	0.383039	0.441346	0.867888	0.385455	0.523566
CG12018	105.557	-0.105474	0.132323	-0.797094	0.425396	0.489251	189.422	-0.138301	0.160983	-0.859105	0.390282	0.528622
CG12020	19.0785	-0.746166	0.306726	-2.43268	0.0149875	0.0235081	80.1394	1.39331	0.348383	3.99937	6.3511e-05	0.000354238
CG12024	451.495	-0.39359	0.067597	-5.8226	5.79385e-09	1.51397e-08	398.687	-0.142968	0.167068	-0.85575	0.392136	0.530555
CG12025	1012.92	-0.325365	0.0462617	-7.03313	2.01946e-12	6.0933e-12	1822.16	-0.175631	0.0844159	-2.08054	0.0374759	0.0837752
CG12027	13.6021	-0.502136	0.352137	-1.42597	0.153878	0.200228	168.438	1.47679	0.282285	5.23158	1.68068e-07	2.22114e-06
CG12034	558.7	-0.215641	0.058941	-3.65858	0.000253613	0.00048984	860.092	-0.0428013	0.0958466	-0.446561	0.655192	0.762899
CG12035	15.1458	-1.56238	0.371096	-4.21017	2.55179e-05	5.37094e-05	120.796	1.28666	0.320025	4.02048	5.80795e-05	0.000327616
CG12038	55.033	-0.335626	0.181613	-1.84803	0.0645983	0.0908006	78.9958	0.311636	0.200084	1.55753	0.119345	0.213978
CG12042	436.077	0.279844	0.0664876	4.20896	2.56547e-05	5.3972e-05	489.533	-0.0696777	0.105351	-0.661389	0.508363	0.639205
CG12050	913.829	0.297874	0.0472169	6.30863	2.81508e-10	7.84894e-10	500.425	-0.0724869	0.114652	-0.632233	0.527235	0.655972
CG12054	2940.39	0.262592	0.0272468	9.63755	5.54969e-22	2.19877e-21	943.124	0.0214655	0.158947	0.135048	0.892574	0.933217
CG12056	142.181	0.0286313	0.114878	0.249233	0.80318	0.838429	190.248	-0.353761	0.184819	-1.9141	0.0556079	0.116233
CG12057	1961.26	-0.683267	0.0350245	-19.5083	9.33808e-85	8.03936e-84	17600.7	-0.726177	0.326525	-2.22395	0.0261517	0.061804
CG12061	7.26367	0.335367	0.462976	0.724371	0.468838	0.533055	52.5533	1.20276	0.386548	3.11155	0.00186108	0.00651693
CG12065	1441.11	0.27757	0.0393904	7.04665	1.8328e-12	5.53382e-12	358.513	-0.561039	0.302542	-1.85441	0.0636798	0.129526
CG12069	17.7755	-0.591989	0.314317	-1.88341	0.0596447	0.0843931	146.227	1.44101	0.270604	5.32517	1.00857e-07	1.43367e-06
CG12071	137.015	-0.529287	0.117403	-4.5083	6.5348e-06	1.43054e-05	114.378	0.366162	0.197381	1.8551	0.0635815	0.129402
CG12075	2377.46	0.486137	0.0312641	15.5494	1.60641e-54	1.05671e-53	342.434	0.151214	0.212281	0.712328	0.476261	0.610632
CG12077	34.1936	0.000280215	0.226666	0.00123625	0.999014	0.99939	86.5847	0.0775148	0.209272	0.370401	0.711084	0.805709
CG12078	11.4121	-0.351261	0.382318	-0.918765	0.358219	0.422261	101.575	1.43068	0.369311	3.87392	0.000107098	0.0005555
CG12079	743.803	1.05625	0.051588	20.4747	3.61696e-93	3.30894e-92	1782.45	-0.762033	0.116446	-6.54408	5.98633e-11	1.99619e-09
CG1208	99.5875	0.408526	0.137754	2.96563	0.00302064	0.00520976	121.858	0.402182	0.258903	1.55341	0.120326	0.215474
CG12081	561.169	-0.914044	0.061004	-14.9833	9.43616e-51	5.96484e-50	509.604	-0.225178	0.248575	-0.905876	0.365002	0.50404
CG12082	1555.55	-0.615258	0.0376151	-16.3567	3.89776e-60	2.7325e-59	555.885	-0.0917798	0.284649	-0.322431	0.747126	0.83358
CG12084	1261.84	-0.141664	0.0401977	-3.52417	0.000424815	0.000801839	574.92	-0.0523588	0.156424	-0.334724	0.737833	0.826326
CG12090	1461.55	0.523484	0.0372355	14.0587	6.81186e-45	3.96125e-44	557.54	0.0537872	0.116295	0.462508	0.643717	0.753489
CG12091	1218.48	-0.123673	0.0396153	-3.12185	0.00179718	0.00318003	739.288	-0.275307	0.202691	-1.35826	0.174381	0.287671
CG12093	311.839	-0.14256	0.077203	-1.84656	0.0648106	0.0910791	734.682	-0.356866	0.147623	-2.41741	0.0156315	0.0403535
CG12096	319.519	-0.414632	0.0820602	-5.05277	4.35437e-07	1.02682e-06	609.49	-0.210319	0.124599	-1.68797	0.0914168	0.173092
CG12099	2678.38	0.0979386	0.0281792	3.47556	0.000509795	0.000954065	3196.63	-0.0756439	0.0804035	-0.940803	0.346806	0.485855
CG12104	212.568	-0.39681	0.093578	-4.24042	2.23103e-05	4.71279e-05	616.052	0.26271	0.139194	1.88736	0.0591117	0.121929
CG12105	183.916	0.99705	0.102239	9.75219	1.80538e-22	7.24255e-22	16.6264	0.0689224	0.441718	0.156033	0.876007	0.921541
CG12106	91.8929	0.0901657	0.143428	0.628647	0.52958	0.591754	161.079	-0.0287179	0.179126	-0.160322	0.872627	0.920432
CG12107	203.773	0.34323	0.0945093	3.63171	0.000281554	0.000540466	927.715	-0.298465	0.14346	-2.08047	0.0374826	0.0837752
CG12111	6.79196	-1.95251	0.547115	-3.56873	0.000358717	0.000681673	7.51699	0.57439	0.499301	1.15039	0.249984	0.379553
CG12112	239.722	-0.361151	0.0902496	-4.0017	6.28899e-05	0.000128057	413.721	-0.132229	0.153833	-0.859564	0.39003	0.528452
CG12115	706.705	-1.07854	0.0605682	-17.8071	6.23025e-71	4.82306e-70	4191.51	-0.292361	0.122825	-2.38031	0.0172983	0.0438468
CG12116	6187.59	-2.12849	0.0249018	-85.4753	0	0	7509.08	-1.20772	0.150085	-8.04692	8.49044e-16	6.47878e-14
CG12118	213.77	-0.667444	0.0975646	-6.84105	7.86144e-12	2.323e-11	542.722	-0.0924706	0.12597	-0.734068	0.462907	0.598072
CG12119	841.914	0.0814081	0.0481019	1.69241	0.0905682	0.123769	265.762	-0.446107	0.200538	-2.22455	0.0261116	0.0617562
CG12121	1153.59	-0.219445	0.0416998	-5.26249	1.42118e-07	3.43449e-07	1298.32	-0.229131	0.110002	-2.08298	0.0372534	0.0834427
CG12123	95.9344	-0.435423	0.144076	-3.02217	0.00250968	0.00436943	251.52	-0.0770609	0.175055	-0.440209	0.659786	0.766028
CG12125	311.143	-0.249514	0.0847188	-2.9452	0.00322742	0.00555142	217.552	-0.0627139	0.230585	-0.271978	0.785639	0.862241
CG12126	10.4396	-0.826105	0.420049	-1.96669	0.0492191	0.0707817	91.0169	1.14002	0.359018	3.1754	0.00149633	0.00538677
CG12128	273.782	0.372265	0.0849088	4.38429	1.16364e-05	2.50651e-05	276.59	0.133154	0.130039	1.02396	0.305856	0.44184
CG12129	222.225	-0.0289582	0.0931733	-0.3108	0.755953	0.797242	522.977	-0.277067	0.120556	-2.29824	0.0215479	0.0526031
CG1213	309.551	-0.344378	0.0781108	-4.40885	1.03923e-05	2.24754e-05	305.588	0.184454	0.313937	0.58755	0.556835	0.681751
CG12133	1.82332	0.919175	0.744669	1.23434	0.217076	0.27216	2.40653	0.0378547	0.561133	0.0674611	0.946215	NA
CG12134	171.048	0.0755491	0.10422	0.724903	0.468511	0.532729	279.418	-0.114851	0.146167	-0.785751	0.432013	0.568552
CG12147	26.1994	-0.748467	0.287581	-2.60264	0.00925103	0.0149879	58.8217	1.04511	0.440762	2.37114	0.0177331	0.044812
CG12155	355.903	-0.522314	0.0740214	-7.05625	1.71051e-12	5.17621e-12	377.798	-0.0959829	0.139618	-0.687466	0.491789	0.625064
CG12158	3.58361	1.76095	0.644472	2.7324	0.00628756	0.0103934	3.93469	0.910055	0.55772	1.63174	0.102734	0.190093
CG12159	134.928	-0.238624	0.119656	-1.99424	0.0461256	0.0666755	443.683	0.0368848	0.128347	0.287384	0.773819	0.853703
CG12162	355.717	0.565404	0.0757047	7.46855	8.10844e-14	2.56097e-13	349.284	-0.0915629	0.292671	-0.312852	0.754393	0.838904
CG12163	4418.11	-1.32547	0.0253091	-52.3711	0	0	7992.6	-0.0660296	0.225397	-0.292948	0.769562	0.84977
CG12164	18.8672	1.31034	0.317828	4.12282	3.7427e-05	7.76086e-05	1.03155	-0.432593	0.507051	-0.853156	0.393573	NA
CG12170	298.483	0.73469	0.0813954	9.02619	1.77756e-19	6.61917e-19	227.725	-0.452897	0.24047	-1.88338	0.0596486	0.122853
CG12171	750.706	0.646109	0.0543007	11.8987	1.20155e-32	5.80433e-32	1253.33	-0.853553	0.136768	-6.24089	4.35092e-10	1.17645e-08
CG12173	207.695	-0.315015	0.0973851	-3.23473	0.00121757	0.00219606	596.424	-0.548844	0.139811	-3.92561	8.65116e-05	0.000461222
CG12177	161.403	0.967363	0.107534	8.99586	2.344e-19	8.68513e-19	133.098	-0.403663	0.188028	-2.14683	0.0318069	0.0729782
CG12179	269.995	-0.0969283	0.085927	-1.12803	0.259307	0.317901	293.051	0.885894	0.212524	4.16845	3.0668e-05	0.000189399
CG1218	241.347	-0.538435	0.09079	-5.93056	3.01907e-09	7.98371e-09	390.193	-0.0605693	0.1431	-0.423267	0.672101	0.776192
CG12182	202.617	0.00383819	0.0944845	0.0406224	0.967597	0.975948	156.441	-0.0302487	0.159785	-0.18931	0.84985	0.905391
CG12184	32.0131	-0.866623	0.246851	-3.51071	0.000446904	0.000841641	100.896	1.14985	0.271449	4.23595	2.27587e-05	0.000146518
CG12194	280.791	0.0855511	0.0821034	1.04199	0.297415	0.358376	259	0.0523541	0.299378	0.174876	0.861177	0.912964
CG12200	4.64658	0.0104268	0.56959	0.0183058	0.985395	0.988779	3.65502	0.405123	0.558673	0.725152	0.468359	0.602999
CG12201	42.0291	0.84557	0.212487	3.9794	6.90898e-05	0.00014032	70.7469	1.47721	0.338777	4.36043	1.29809e-05	9.05023e-05
CG12203	547.16	1.04444	0.06059	17.2378	1.38285e-66	1.03417e-65	881.834	-1.32507	0.14414	-9.19296	3.82172e-20	5.69587e-18
CG12204	83.101	0.535479	0.149784	3.57501	0.000350213	0.00066589	42.0744	-0.364428	0.36333	-1.00302	0.31585	0.452806
CG12206	1521.01	1.01421	0.036444	27.8292	1.92094e-170	2.95035e-169	540.357	-0.486872	0.160995	-3.02414	0.00249342	0.00840463
CG12207	1125.06	-0.413663	0.0424179	-9.7521	1.80697e-22	7.24675e-22	1332.66	0.0395572	0.167924	0.235566	0.81377	0.881834
CG12209	22.6078	-0.0788274	0.286138	-0.275487	0.782942	0.819914	94.2714	1.28078	0.284459	4.50251	6.71561e-06	5.12446e-05
CG12213	622.261	0.0286141	0.059768	0.478753	0.632115	0.68663	773.6	0.106999	0.127309	0.840469	0.400645	0.53896
CG12214	812.348	-0.746615	0.0508938	-14.6701	1.00249e-48	6.17151e-48	1288.31	0.301746	0.164412	1.8353	0.0664611	0.133934
CG12219	220.239	-0.0777951	0.0931875	-0.834824	0.403817	0.467071	212.265	0.249505	0.217721	1.14598	0.251802	0.381801
CG12224	256.963	-1.98763	0.102214	-19.4457	3.16701e-84	2.71092e-83	859.396	-0.0584904	0.151392	-0.386351	0.699237	0.797095
CG12229	37.9026	-1.48051	0.243748	-6.07394	1.24806e-09	3.36801e-09	295.819	1.285	0.283527	4.5322	5.83725e-06	4.54911e-05
CG12231	3.2824	-0.0535479	0.634104	-0.0844465	0.932701	0.946577	12.7939	1.17034	0.458955	2.55	0.0107723	0.0295515
CG12236	618.977	0.0138802	0.0571321	0.242949	0.808045	0.842722	123.542	0.105397	0.277219	0.380194	0.703801	0.800758
CG12237	491.292	-0.379396	0.0638205	-5.94473	2.76905e-09	7.34136e-09	167.086	-0.368077	0.217669	-1.69099	0.0908379	0.172206
CG12239	190.127	0.00487686	0.104549	0.0466465	0.962795	0.97198	131.289	-0.26148	0.245981	-1.06301	0.287777	0.421996
CG12241	757.115	0.0490862	0.0502292	0.977243	0.328449	0.390885	410.609	-0.110929	0.154013	-0.720255	0.471368	0.606107
CG12253	71.7252	-0.616615	0.161669	-3.81406	0.000136704	0.000270132	170.771	0.0195805	0.178355	0.109784	0.912581	0.945191
CG12256	1.06302	-1.94348	0.815896	-2.38202	0.0172182	0.0267695	1.67164	0.0105215	0.552996	0.0190263	0.98482	NA
CG12259	126.889	0.0490297	0.1276	0.384246	0.700796	0.749209	187.867	-0.397241	0.279407	-1.42173	0.155106	0.263733
CG12262	4043.61	-0.91936	0.0250364	-36.721	3.38076e-295	8.26073e-294	7578.36	-0.803665	0.224122	-3.58583	0.000336002	0.00148514
CG12263	728.392	-0.270932	0.0509602	-5.31655	1.05756e-07	2.5738e-07	536.02	-0.0492193	0.144434	-0.340775	0.733273	0.822692
CG12264	460.907	0.315518	0.0647423	4.87344	1.09674e-06	2.52424e-06	533.912	-0.355628	0.204718	-1.73716	0.0823586	0.159355
CG12267	127.902	-0.296306	0.125979	-2.35203	0.0186711	0.0288613	206.744	-0.227217	0.152378	-1.49115	0.135923	0.237746
CG12268	139.333	-0.630223	0.122049	-5.16368	2.42137e-07	5.78605e-07	180.45	0.537757	0.287238	1.87216	0.061184	0.125311
CG12269	4.89834	0.352702	0.542734	0.649862	0.515781	0.578742	27.9926	0.491456	0.31374	1.56644	0.117245	0.211132
CG1227	152.622	0.117025	0.109654	1.06722	0.285874	0.346239	256.268	-0.465833	0.132068	-3.52721	0.000419962	0.00179194
CG12272	971.072	-0.803183	0.0463638	-17.3235	3.12624e-67	2.35106e-66	838.484	-0.248251	0.101236	-2.4522	0.0141987	0.0371483
CG12278	0	NA	NA	NA	NA	NA	0	NA	NA	NA	NA	NA
CG12279	125.999	-0.279043	0.127035	-2.19659	0.0280499	0.0421941	697.267	-0.321053	0.109532	-2.93115	0.0033771	0.0109443
CG12288	94.1676	-0.789421	0.150649	-5.24015	1.60445e-07	3.86559e-07	158.028	-1.10767	0.171246	-6.46827	9.91301e-11	3.09018e-09
CG12289	7.2012	-1.73757	0.516818	-3.36204	0.000773679	0.00142431	29.6005	0.762314	0.424112	1.79744	0.0722663	0.143222
CG12290	739.17	1.5853	0.056743	27.9383	9.1471e-172	1.41785e-170	117.967	0.110603	0.355298	0.311295	0.755576	0.839844
CG12299	461.895	-0.802823	0.0713062	-11.2588	2.09562e-29	9.6482e-29	231.268	-0.133508	0.219943	-0.607011	0.543844	0.670133
CG12301	271.331	0.454596	0.0869241	5.22981	1.69689e-07	4.08244e-07	271.299	-0.257174	0.128113	-2.0074	0.0447076	0.0967589
CG12304	593.11	0.503778	0.0566129	8.89864	5.65333e-19	2.0696e-18	1170.32	-0.376044	0.117137	-3.2103	0.00132597	0.00484217
CG12307	9.97308	-1.26332	0.429435	-2.94182	0.00326286	0.00561023	136.071	1.58054	0.300896	5.25278	1.49823e-07	2.01241e-06
CG12309	94.619	-1.16812	0.148245	-7.87966	3.28269e-15	1.08767e-14	557.163	1.16584	0.27563	4.22973	2.33974e-05	0.000149931
CG1231	19.0674	1.32701	0.31092	4.26801	1.97226e-05	4.17865e-05	5.62455	0.174674	0.514639	0.339411	0.7343	0.823258
CG12310	4134.97	-1.3339	0.0254917	-52.3268	0	0	25820.8	-0.661978	0.162838	-4.06525	4.79811e-05	0.000278483
CG12316	709.877	0.0550274	0.0556155	0.989425	0.322455	0.38448	388.001	0.204485	0.140961	1.45064	0.146879	0.252786
CG12320	80.7462	-0.143309	0.167335	-0.856422	0.391765	0.455286	127.363	-0.133187	0.167941	-0.793055	0.427746	0.564249
CG12321	393.852	-1.37852	0.0765245	-18.0142	1.50867e-72	1.18015e-71	1240.93	-0.0606037	0.10771	-0.562656	0.573669	0.696195
CG12325	304.845	0.0347637	0.0796846	0.436267	0.662643	0.714421	320.394	-0.130011	0.136412	-0.95307	0.340555	0.479382
CG1233	1162.17	0.177852	0.0427482	4.16047	3.17599e-05	6.62149e-05	658.532	-0.171689	0.107982	-1.58998	0.11184	0.20355
CG12333	339.268	-0.272106	0.0739204	-3.68107	0.00023226	0.000450149	156.262	0.0576056	0.263918	0.218271	0.827218	0.890509
CG12338	402.884	-0.372468	0.072357	-5.14765	2.63769e-07	6.28955e-07	1466.78	-0.655459	0.185629	-3.53102	0.000413967	0.00177244
CG1234	464.794	0.0999462	0.067895	1.47207	0.141002	0.185033	535.843	0.0649275	0.112451	0.577384	0.56368	0.688236
CG12341	197.834	-0.163214	0.0967165	-1.68755	0.0914975	0.124887	402.342	-0.0654783	0.119972	-0.54578	0.585217	0.70635
CG12343	140.091	-0.397793	0.119964	-3.31592	0.000913405	0.00166919	492.979	0.0810605	0.111649	0.726031	0.46782	0.602569
CG12344	30.6107	-0.756343	0.248975	-3.03782	0.00238294	0.00415846	31.8175	0.747	0.317317	2.35411	0.0185669	0.0465127
CG12347	3.36534	0.120636	0.632771	0.190647	0.848802	0.876185	35.7781	1.46048	0.377443	3.8694	0.000109106	0.000564188
CG12355	32.8499	1.03001	0.240049	4.29082	1.78014e-05	3.78532e-05	80.4327	0.24488	0.248584	0.985097	0.324576	0.462625
CG1236	996.467	-2.47745	0.0572696	-43.2594	0	0	3061.91	-0.787155	0.114167	-6.89477	5.39511e-12	2.21466e-10
CG12360	1563.97	-0.24668	0.0363693	-6.78264	1.18003e-11	3.46481e-11	2500.91	-0.135373	0.103415	-1.30902	0.190528	0.307964
CG12362	37.614	-1.02345	0.229103	-4.46722	7.9244e-06	1.72603e-05	237.006	1.12599	0.289064	3.89528	9.80852e-05	0.000514978
CG12374	8.39619	2.12177	0.485182	4.37313	1.22477e-05	2.63314e-05	12.3449	-0.253978	0.421526	-0.60252	0.546828	0.673144
CG12375	267.567	0.143544	0.0838036	1.71286	0.0867386	0.118854	803.025	-0.656341	0.113525	-5.78148	7.40471e-09	1.48309e-07
CG12376	31.5669	-0.661592	0.240547	-2.75036	0.00595298	0.0098707	232.857	1.29909	0.293381	4.42798	9.51197e-06	6.91466e-05
CG12379	26.8783	0.966749	0.260459	3.71171	0.000205865	0.000400669	79.4601	-0.330961	0.252318	-1.31169	0.189626	0.306746
CG12384	995.551	-0.459153	0.0454726	-10.0974	5.67462e-24	2.33858e-23	5564.31	-0.516892	0.109931	-4.70197	2.57662e-06	2.24898e-05
CG1239	77.2833	0.0429362	0.158261	0.2713	0.78616	0.822708	145.591	0.287605	0.19255	1.49366	0.135265	0.236897
CG12391	541.73	-0.134939	0.061277	-2.20212	0.0276568	0.0416588	459.363	-0.318012	0.231672	-1.37268	0.169852	0.282397
CG12393	272.881	0.0531409	0.0824823	0.644271	0.5194	0.582315	440.014	-0.0527459	0.127883	-0.412454	0.680006	0.782803
CG12395	10.4683	0.63824	0.396103	1.6113	0.107115	0.144052	64.8789	0.951979	0.31264	3.04497	0.00232702	0.00791236
CG12398	4.50065	0.743267	0.574647	1.29343	0.195861	0.248389	9.14682	0.722535	0.499079	1.44774	0.147691	0.253867
CG1240	1473.81	-0.612881	0.0384361	-15.9454	3.0654e-57	2.07745e-56	1223.34	-0.399417	0.205208	-1.9464	0.051607	0.109202
CG12400	683.934	1.12508	0.0557054	20.1969	1.04308e-90	9.38913e-90	1685.65	-0.889649	0.160003	-5.56021	2.69444e-08	4.55877e-07
CG12402	118.371	-0.998663	0.1319	-7.57137	3.69306e-14	1.17749e-13	168.414	0.325622	0.194732	1.67216	0.094493	0.177942
CG12404	422.792	-0.015529	0.070391	-0.22061	0.825396	0.857292	1191.31	-0.301794	0.125708	-2.40076	0.0163609	0.0418719
CG12413	164.433	0.690299	0.11441	6.03354	1.60402e-09	4.30957e-09	94.4078	-0.0990763	0.263192	-0.376442	0.706588	0.802534
CG12420	3.37649	-0.311498	0.618129	-0.503937	0.614306	0.669721	0.870585	-0.231598	0.44046	-0.525809	0.599021	NA
CG12426	2.45868	0.139751	0.685182	0.203962	0.838383	0.868499	18.9312	1.34058	0.396626	3.37995	0.000725002	0.00287367
CG12428	1257.66	-0.953953	0.0426066	-22.3898	4.94598e-111	5.21326e-110	1578.24	-0.929287	0.134654	-6.90129	5.15316e-12	2.1294e-10
CG12438	5.66945	-1.01334	0.526148	-1.92596	0.0541096	0.0771625	53.2768	1.44794	0.408748	3.54237	0.000396542	0.0017096
CG12439	1.57342	-0.142722	0.760204	-0.187742	0.851079	0.878198	4.6901	0.338516	0.565006	0.599136	0.549082	0.67525
CG12446	16.6117	-0.5377	0.329742	-1.63067	0.10296	0.138937	22.1985	0.869203	0.392161	2.21644	0.0266611	0.0628051
CG12448	20.5889	-1.28573	0.310517	-4.14061	3.46386e-05	7.19599e-05	210.94	1.32225	0.300188	4.40475	1.05904e-05	7.60089e-05
CG1246	604.853	0.169372	0.0561712	3.01529	0.00256737	0.00446293	882.252	-0.55772	0.244416	-2.28185	0.0224981	0.0546439
CG12464	3.03116	-0.0906016	0.635294	-0.142614	0.886595	0.909157	47.8619	1.08322	0.375341	2.88595	0.00390234	0.0123978
CG12470	39.5679	-0.00769809	0.211914	-0.0363265	0.971022	0.978155	452.83	1.45683	0.240986	6.04528	1.49149e-09	3.52683e-08
CG12477	33.4186	-0.0291721	0.232925	-0.125242	0.900332	0.920189	130.418	0.593937	0.214426	2.76989	0.00560759	0.0169536
CG12479	2.82306	-1.1789	0.677684	-1.7396	0.0819284	0.1128	27.7202	1.23839	0.364912	3.39367	0.000689629	0.00274747
CG12480	70.7543	6.27011	0.46572	13.4633	2.57298e-41	1.42356e-40	1.13682	0.220669	0.51267	0.430431	0.666882	NA
CG12481	14.2908	-2.97478	0.473474	-6.28288	3.32359e-10	9.24373e-10	83.2956	1.78319	0.229719	7.76247	8.32913e-15	5.34009e-13
CG12483	11.6167	4.44984	0.61535	7.2314	4.78049e-13	1.47182e-12	0.716184	-0.0857965	0.428227	-0.200353	0.841204	NA
CG12484	160.99	0.0734208	0.107014	0.686084	0.49266	0.556141	30.5651	0.279567	0.311067	0.898737	0.368793	0.507762
CG12490	7.82965	2.09957	0.510872	4.10977	3.96047e-05	8.19473e-05	6.92963	-1.6453	0.561719	-2.92905	0.00340001	0.0110071
CG12491	0	NA	NA	NA	NA	NA	0.416734	-0.215391	0.285377	-0.75476	0.450393	NA
CG12493	109.123	-0.527272	0.143493	-3.67456	0.000238263	0.000461252	681.58	1.23701	0.220095	5.62034	1.90584e-08	3.36717e-07
CG12496	28.5689	0.190444	0.253456	0.751387	0.45242	0.516267	2.51542	-0.199707	0.565857	-0.352928	0.724143	NA
CG12498	5.76782	-0.078382	0.513324	-0.152695	0.878639	0.902478	34.1725	1.26949	0.369343	3.43716	0.000587842	0.00239175
CG12499	1392.35	0.326841	0.0378401	8.63742	5.74969e-18	2.04797e-17	408.916	-0.201248	0.148942	-1.35118	0.176637	0.290568
CG12502	34.3724	0.573475	0.22834	2.5115	0.012022	0.0191471	6.91861	0.0528873	0.48822	0.108327	0.913736	0.945669
CG12506	3.07005	1.31695	0.651922	2.0201	0.043373	0.0630082	8.06417	-0.273435	0.541133	-0.505301	0.613347	0.72989
CG12507	9.28571	0.296774	0.464913	0.638343	0.52325	0.586094	3.7676	0.108174	0.557072	0.194183	0.846032	0.90318
CG12511	3.85104	-0.227094	0.585086	-0.388138	0.697914	0.746841	11.6889	1.39989	0.470846	2.97313	0.00294781	0.00971513
CG12512	808.168	2.55734	0.0592061	43.1938	0	0	357.642	-1.38483	0.272391	-5.08397	3.69634e-07	4.30075e-06
CG12516	9.72067	-1.62561	0.453493	-3.58463	0.000337553	0.000642909	80.2119	0.933283	0.306639	3.04359	0.00233774	0.00794449
CG12517	1.06104	-1.99372	0.815866	-2.44369	0.014538	0.022843	2.3779	-0.773985	0.564519	-1.37105	0.170359	NA
CG12519	1.00872	-0.728624	0.810846	-0.898597	0.368867	0.43283	3.46333	0.105363	0.565789	0.186223	0.85227	0.907036
CG12520	8.23324	1.30937	0.459269	2.85099	0.00435835	0.00737032	6.40535	-0.0156544	0.512436	-0.030549	0.975629	0.986281
CG12521	2.50769	-0.415799	0.670263	-0.620352	0.535026	0.596797	55.6791	1.56342	0.330016	4.73739	2.16486e-06	1.95403e-05
CG12522	21.5653	-0.148617	0.288844	-0.514522	0.606887	0.662601	79.8263	-3.31156	0.42692	-7.75687	8.70526e-15	5.55262e-13
CG12523	0.399009	0.499721	0.776111	0.643879	0.519654	NA	0	NA	NA	NA	NA	NA
CG12531	319.487	-0.239111	0.0785782	-3.04296	0.00234261	0.00409339	82.1528	0.453101	0.229041	1.97825	0.0479002	0.102597
CG12535	15.7016	0.342378	0.336625	1.01709	0.30911	0.370838	69.4041	1.45253	0.267572	5.42856	5.68094e-08	8.66989e-07
CG12538	0.458531	-0.417188	0.79645	-0.523809	0.600411	NA	0.541831	0.565992	0.443411	1.27645	0.201797	NA
CG12539	679.627	-8.13608	0.341755	-23.8068	2.83997e-125	3.29588e-124	383.917	-0.243383	0.226502	-1.07453	0.282587	0.416894
CG12540	1.86324	2.27987	0.786513	2.89871	0.00374704	0.00639528	1.11606	-0.0703523	0.503465	-0.139736	0.888868	NA
CG12541	23.447	-0.147433	0.271045	-0.543945	0.586479	0.643719	22.1349	0.942842	0.367994	2.56211	0.0104038	0.0286987
CG12546	0	NA	NA	NA	NA	NA	0	NA	NA	NA	NA	NA
CG12547	1293.59	0.0826225	0.0404282	2.04369	0.0409846	0.0597972	1558.67	-0.203397	0.0869294	-2.3398	0.0192942	0.0480538
CG12558	0	NA	NA	NA	NA	NA	0	NA	NA	NA	NA	NA
CG12560	84.3263	0.618188	0.148399	4.16573	3.1036e-05	6.4786e-05	325.588	-0.309185	0.195024	-1.58537	0.112883	0.204879
CG12567	1145.48	-0.0431458	0.0421004	-1.02483	0.305443	0.366963	1616.73	-0.279297	0.112782	-2.47644	0.0132701	0.0351031
CG12576	2052.39	0.0751622	0.0319469	2.35272	0.0186367	0.0288182	2254.35	0.137507	0.150111	0.916032	0.35965	0.498643
CG12581	2858.22	0.266111	0.0281156	9.46489	2.9388e-21	1.14311e-20	957.896	0.040437	0.0903821	0.4474	0.654586	0.762337
CG12582	2305.97	0.180086	0.0313156	5.75068	8.88853e-09	2.30071e-08	2034.36	-0.237056	0.092007	-2.5765	0.00998065	0.0276603
CG12589	2.54175	-0.181982	0.668943	-0.272043	0.785589	0.822173	18.8939	1.25595	0.405988	3.09356	0.00197773	0.00686797
CG12590	12.1459	0.167664	0.364719	0.459706	0.645727	0.699043	3.22754	0.0191656	0.554505	0.0345634	0.972428	NA
CG12592	62.9273	-0.2249	0.171156	-1.31401	0.188843	0.240442	95.1021	0.177243	0.216865	0.8173	0.413757	0.551292
CG12594	71.4437	-0.185358	0.160038	-1.15822	0.246776	0.304427	42.8079	0.164912	0.373216	0.441868	0.658585	0.765273
CG12605	275.008	-0.874709	0.0867642	-10.0815	6.67293e-24	2.74579e-23	102.311	0.803506	0.19212	4.18232	2.88545e-05	0.000179806
CG12607	710.778	4.77008	0.102469	46.5514	0	0	170.796	-0.874138	0.328451	-2.66139	0.0077818	0.0224155
CG12608	321.438	-0.0543612	0.0773893	-0.702438	0.482406	0.546263	516.419	-0.326488	0.123943	-2.63418	0.00843417	0.0239726
CG12609	20.5204	-0.946869	0.307313	-3.08113	0.00206219	0.00362746	104.807	1.44176	0.28396	5.07734	3.82756e-07	4.41625e-06
CG12617	19.8897	-0.936338	0.314166	-2.98039	0.00287877	0.00497784	142.74	1.25636	0.313695	4.00503	6.20105e-05	0.000346646
CG12620	24.223	-0.977116	0.285135	-3.42685	0.000610623	0.0011358	253.588	1.22683	0.255056	4.81006	1.50883e-06	1.42173e-05
CG12637	5.7325	-0.471274	0.512951	-0.91875	0.358226	0.422261	68.4032	1.04046	0.37071	2.80666	0.0050058	0.0154076
CG12640	0.698201	1.04887	0.812393	1.29108	0.196675	0.249303	0.208367	-0.180497	0.261761	-0.689548	0.490478	NA
CG12643	516.757	0.168339	0.062348	2.69998	0.00693433	0.0114106	2683.77	0.00739324	0.245698	0.0300908	0.975995	0.986464
CG12645	3.84483	-0.959037	0.622327	-1.54105	0.123305	0.163583	0.496742	-0.161618	0.349168	-0.462865	0.643461	NA
CG1265	713.554	0.671153	0.0544029	12.3367	5.74562e-35	2.87046e-34	1173.28	-0.968979	0.195258	-4.96255	6.95726e-07	7.40243e-06
CG12655	125.363	-2.88686	0.169241	-17.0577	3.066e-65	2.2727e-64	277.084	1.26873	0.174065	7.28885	3.12609e-13	1.60671e-11
CG12659	69.0947	-0.162893	0.170725	-0.954127	0.340019	0.403217	204.374	0.0864825	0.153512	0.563359	0.573191	0.695885
CG12661	1.76187	-1.48098	0.769352	-1.92497	0.0542337	0.0773147	15.2922	1.07388	0.435987	2.46309	0.0137745	0.0362828
CG12662	0.94465	0.989602	0.809611	1.22232	0.221587	0.277144	0.32645	-0.0585888	0.315432	-0.185742	0.852647	NA
CG12672	33.8517	1.5996	0.244415	6.5446	5.96546e-11	1.70938e-10	1.21667	0.0231332	0.516692	0.0447719	0.964289	NA
CG12674	27.0514	-0.284076	0.260965	-1.08856	0.276348	0.336155	162.146	0.456752	0.251909	1.81316	0.0698071	0.139457
CG12679	10.8997	-0.387055	0.389443	-0.993866	0.320288	0.382405	94.7525	1.15055	0.316228	3.63835	0.00027439	0.00124947
CG12680	1.59176	-0.913221	0.772037	-1.18287	0.23686	0.293866	13.2013	1.81522	0.495697	3.66196	0.000250293	0.00115473
CG12681	35.1349	0.769572	0.229222	3.35732	0.00078703	0.0014475	215.58	1.54729	0.252233	6.13438	8.54933e-10	2.16571e-08
CG12682	2.47724	-1.26386	0.700542	-1.80412	0.0712127	0.0991738	25.8539	1.04107	0.399775	2.60415	0.00921023	0.0258302
CG12684	12.0643	-0.279347	0.384105	-0.727268	0.467062	0.53135	107.597	1.08713	0.353167	3.07822	0.00208239	0.00717671
CG12688	1.43845	-1.20813	0.786563	-1.53596	0.124548	0.16502	3.0103	0.559892	0.561644	0.99688	0.318823	NA
CG12689	19.5358	-0.320108	0.302907	-1.05679	0.290609	0.35134	228.505	1.44441	0.263605	5.47945	4.26645e-08	6.75141e-07
CG12691	3.27135	-0.0562594	0.638895	-0.0880575	0.929831	0.944494	30.8055	1.29916	0.404321	3.21318	0.00131272	0.00479943
CG12692	35.0362	-1.07936	0.235975	-4.57405	4.78375e-06	1.0579e-05	247.478	1.00374	0.254319	3.94676	7.92146e-05	0.000427635
CG12693	23.689	-1.28871	0.293916	-4.38463	1.16182e-05	2.50301e-05	143.333	1.35951	0.255934	5.31195	1.08457e-07	1.52947e-06
CG12698	42.6472	1.08941	0.206965	5.26377	1.41133e-07	3.41131e-07	138.052	1.29271	0.271528	4.76086	1.92773e-06	1.76303e-05
CG12699	295.173	-0.944539	0.0865607	-10.9119	1.0116e-27	4.48825e-27	2354.4	1.32615	0.258764	5.12493	2.97656e-07	3.60491e-06
CG12702	213.638	-0.505218	0.0949289	-5.32207	1.02594e-07	2.49867e-07	106.853	0.042691	0.214197	0.199307	0.842022	0.900445
CG12708	56.5146	-1.11853	0.189451	-5.90403	3.54725e-09	9.35103e-09	28.1368	0.410538	0.345667	1.18767	0.234964	0.361525
CG1271	214.467	-0.274251	0.101549	-2.70068	0.00691974	0.011388	280.079	-0.104049	0.136061	-0.764722	0.444437	0.580297
CG12713	84.1439	0.107358	0.149297	0.719086	0.472088	0.53607	144.634	0.161697	0.195913	0.825354	0.409171	0.547115
CG12715	1314.99	-3.3815	0.0606065	-55.7944	0	0	4508.33	-0.850217	0.273694	-3.10645	0.00189351	0.00661003
CG12716	1.17304	0.864733	0.800465	1.08029	0.280014	0.339999	1.33785	0.127305	0.543164	0.234376	0.814693	NA
CG12717	333.6	-0.0562649	0.0777107	-0.72403	0.469047	0.533248	143.519	0.252347	0.173528	1.45421	0.145887	0.251495
CG12721	17.546	4.01454	0.485931	8.26154	1.43811e-16	4.93029e-16	137.596	5.14006	0.337118	15.2471	1.722e-52	1.78485e-49
CG12723	1.81517	1.85884	0.769655	2.41516	0.0157284	0.0245812	0.641626	-0.136262	0.467981	-0.29117	0.770921	NA
CG12725	5.38911	0.240109	0.518015	0.463517	0.642994	0.696533	39.9023	0.61126	0.300981	2.03089	0.0422659	0.0924233
CG12728	202.794	-0.598859	0.109569	-5.46561	4.61321e-08	1.14533e-07	219.199	-0.0977033	0.155911	-0.626663	0.53088	0.659022
CG12729	1.35229	0.134978	0.770566	0.175168	0.860948	0.886883	27.1805	2.40064	0.392627	6.1143	9.69794e-10	2.41729e-08
CG1273	166.921	-3.25338	0.159066	-20.4531	5.6413e-93	5.13641e-92	208.092	1.19916	0.276243	4.34097	1.41857e-05	9.75352e-05
CG12730	398.79	0.0127012	0.069611	0.18246	0.855222	0.881863	564.892	0.176563	0.14429	1.22366	0.22108	0.344198
CG12736	451.308	0.462524	0.0643708	7.18531	6.70549e-13	2.05461e-12	252.441	-0.335503	0.18892	-1.7759	0.0757495	0.148889
CG12744	50.3677	0.226642	0.189618	1.19526	0.231986	0.288592	138.936	0.413271	0.175884	2.34968	0.0187895	0.0469756
CG12746	455.821	0.959107	0.0668035	14.3571	9.61246e-47	5.76447e-46	406.903	-0.486686	0.166066	-2.93068	0.00338219	0.010958
CG1275	713.833	0.354953	0.053061	6.68953	2.23891e-11	6.50847e-11	1851.5	-0.0394961	0.0846766	-0.466435	0.640904	0.751751
CG12766	37.525	2.35718	0.256407	9.19313	3.81561e-20	1.44404e-19	10.5565	0.0317792	0.445137	0.071392	0.943086	0.965308
CG12768	95.6477	-0.121133	0.137602	-0.880313	0.37869	0.442641	177.908	0.929164	0.16063	5.7845	7.27273e-09	1.46136e-07
CG12769	34.3452	0.705675	0.244305	2.8885	0.00387085	0.00659572	2.03344	0.0425974	0.565594	0.0753145	0.939965	NA
CG12772	383.469	-0.465438	0.0706683	-6.58623	4.51141e-11	1.29687e-10	252.358	-0.240729	0.203457	-1.1832	0.236731	0.363559
CG12773	2144.92	-0.0625649	0.0313395	-1.99636	0.0458948	0.066377	1327.9	-0.335089	0.216297	-1.54921	0.121332	0.216953
CG12780	61.1526	-0.300199	0.174022	-1.72507	0.0845153	0.116088	391.427	1.18997	0.253655	4.69131	2.71467e-06	2.35443e-05
CG12782	67.8255	2.82776	0.206519	13.6925	1.12594e-42	6.37925e-42	163.999	2.82345	0.218612	12.9154	3.68763e-38	2.08485e-35
CG12783	11.8124	0.0393092	0.380824	0.103221	0.917787	0.934475	37.4348	1.50281	0.393913	3.81508	0.00013614	0.000683061
CG12784	2.44086	-0.654684	0.686175	-0.954107	0.34003	0.403217	44.0465	1.5978	0.388825	4.1093	3.96852e-05	0.000237196
CG12788	0	NA	NA	NA	NA	NA	0	NA	NA	NA	NA	NA
CG12795	330.836	-1.00736	0.0811452	-12.4143	2.18572e-35	1.09891e-34	760.795	0.341289	0.158261	2.1565	0.0310446	0.0715211
CG12796	0.908763	0.470812	0.814004	0.57839	0.563001	0.621685	0.982457	-0.137783	0.449522	-0.306511	0.759216	NA
CG12811	315.198	-0.403865	0.0800928	-5.04247	4.59567e-07	1.08163e-06	1242.53	-0.611435	0.165623	-3.69173	0.000222731	0.00104976
CG12814	1027.84	0.0817725	0.0433297	1.88721	0.0591315	0.0837286	1214.77	-0.173061	0.11125	-1.5556	0.119803	0.214621
CG12817	10.1909	-0.538469	0.410705	-1.31109	0.189829	0.241537	42.3489	0.861012	0.33804	2.54707	0.010863	0.029774
CG12818	67.0095	-0.0234642	0.163974	-0.143097	0.886213	0.909008	170.629	0.233416	0.207019	1.12751	0.259527	0.390846
CG12821	87.9042	0.0904565	0.157325	0.574967	0.565314	0.623697	96.4875	-0.46189	0.188321	-2.45268	0.0141798	0.0371068
CG12822	23.0123	-0.086008	0.283898	-0.302954	0.761925	0.802092	6.82735	-0.221139	0.499804	-0.442452	0.658162	0.764906
CG12824	191.48	-1.07196	0.103925	-10.3148	6.04114e-25	2.53947e-24	1185.48	-0.240128	0.0914742	-2.62509	0.00866263	0.0245211
CG12825	569.811	0.6519	0.0612061	10.6509	1.72706e-26	7.52105e-26	2542.87	-0.479469	0.202451	-2.36832	0.0178691	0.0451007
CG12826	166.484	-0.550535	0.109824	-5.01287	5.36239e-07	1.25746e-06	391.533	-0.248549	0.197342	-1.25948	0.207855	0.328293
CG12828	0	NA	NA	NA	NA	NA	0	NA	NA	NA	NA	NA
CG12831	13.3109	-0.960205	0.370483	-2.59176	0.00954855	0.015442	92.4878	1.43283	0.324054	4.42158	9.7982e-06	7.08959e-05
CG12836	0.617332	-0.0488381	0.814383	-0.0599695	0.95218	NA	0	NA	NA	NA	NA	NA
CG12848	140.153	0.390081	0.115435	3.37923	0.000726879	0.0013422	291.348	-0.312743	0.147081	-2.12633	0.0334756	0.0762862
CG12849	0	NA	NA	NA	NA	NA	0.423743	0.34414	0.363754	0.946078	0.344109	NA
CG12851	155.612	-0.456514	0.11527	-3.9604	7.48233e-05	0.000151484	101.977	0.152667	0.199519	0.765177	0.444166	0.580004
CG12853	15.8371	-0.004438	0.327137	-0.0135662	0.989176	0.991389	189.267	1.56808	0.317021	4.94631	7.56333e-07	7.93193e-06
CG12857	48.8817	-0.824713	0.200659	-4.11002	3.95625e-05	8.18726e-05	281.614	1.15425	0.287903	4.00916	6.09345e-05	0.000341561
CG12858	151.014	0.427992	0.110244	3.88223	0.000103502	0.000207019	68.0004	-0.557942	0.231754	-2.40747	0.0160634	0.0412064
CG12859	373.375	1.23257	0.0732527	16.8263	1.56686e-63	1.1413e-62	1116.83	-0.728487	0.176024	-4.13858	3.49467e-05	0.000212343
CG12860	59.7268	-1.48663	0.192096	-7.73897	1.00224e-14	3.2613e-14	751.164	1.74471	0.273087	6.38885	1.67143e-10	5.02156e-09
CG12861	79.4239	-1.25909	0.165635	-7.60157	2.92556e-14	9.35665e-14	808.208	1.44671	0.276951	5.22369	1.75393e-07	2.29636e-06
CG12862	0	NA	NA	NA	NA	NA	0	NA	NA	NA	NA	NA
CG12863	122.007	0.00244988	0.121775	0.020118	0.983949	0.987771	190.48	0.108462	0.146211	0.741813	0.458201	0.594275
CG12866	37.2133	-1.31205	0.239927	-5.46856	4.53697e-08	1.12703e-07	96.8464	0.860334	0.306745	2.80472	0.00503605	0.0154892
CG12868	209.691	-0.106848	0.100694	-1.06112	0.288634	0.349204	665.176	-0.191787	0.151183	-1.26857	0.204593	0.324321
CG12869	40.8904	1.70992	0.227276	7.52357	5.32997e-14	1.69097e-13	16.3725	-0.427977	0.376679	-1.13619	0.255878	0.386521
CG1287	179.501	1.30878	0.108853	12.0234	2.67831e-33	1.30934e-32	162.929	1.39488	0.32857	4.24531	2.18295e-05	0.000141488
CG12877	596.478	0.603365	0.0563761	10.7025	9.90852e-27	4.32761e-26	228.377	-0.10949	0.240964	-0.454382	0.649554	0.758306
CG1288	46.398	-0.779704	0.203625	-3.82912	0.000128601	0.000254944	435.682	1.51276	0.281964	5.36507	8.09167e-08	1.17989e-06
CG12880	309.465	-2.11566	0.0938504	-22.5429	1.57481e-112	1.68502e-111	709.75	0.472626	0.135939	3.47674	0.000507548	0.00210289
CG12883	155.755	0.374385	0.11182	3.3481	0.00081367	0.00149486	238.503	-0.526017	0.181034	-2.90563	0.0036652	0.0117313
CG12885	8.11483	0.0225935	0.455644	0.0495859	0.960452	0.969834	3.59594	0.748076	0.560213	1.33534	0.181765	0.296964
CG12895	145.508	0.920605	0.117483	7.83605	4.64946e-15	1.53072e-14	370.465	-0.465887	0.156614	-2.97474	0.0029324	0.0096749
CG12896	62.2626	2.01249	0.21013	9.57737	9.95469e-22	3.91287e-21	60.2703	-0.455599	0.279079	-1.63251	0.102572	0.189865
CG12898	1.14212	0.475501	0.79889	0.595202	0.551708	0.611497	0	NA	NA	NA	NA	NA
CG12902	0	NA	NA	NA	NA	NA	0	NA	NA	NA	NA	NA
CG12907	14.608	-0.443646	0.351512	-1.26211	0.206911	0.260607	96.3459	1.09322	0.25966	4.21018	2.55164e-05	0.000161103
CG12909	114.801	-0.0615878	0.129268	-0.476435	0.633764	0.688202	262.36	-0.178021	0.14809	-1.20211	0.229321	0.354984
CG1291	291.541	-0.203663	0.0809873	-2.51476	0.0119114	0.0189845	722.633	-0.38661	0.134927	-2.86532	0.00416586	0.013121
CG12910	277.111	0.173475	0.0815926	2.12611	0.033494	0.0496225	303.407	-0.137364	0.196158	-0.700271	0.483758	0.617633
CG12911	141.501	2.14659	0.128495	16.7057	1.1918e-62	8.59724e-62	10.5309	-0.35121	0.504441	-0.696235	0.486282	0.619923
CG12912	11.2837	1.58884	0.420167	3.78144	0.000155924	0.000306309	0.124293	0.138322	0.247094	0.559797	0.575618	NA
CG12913	22.7474	-0.455112	0.281388	-1.61738	0.105796	0.142436	18.8836	-0.157063	0.364055	-0.431428	0.666157	0.771621
CG12914	5.33701	-0.473551	0.530685	-0.892339	0.372211	0.436221	55.9998	0.992579	0.283713	3.49853	0.00046783	0.00196583
CG12917	30.6456	0.393097	0.239778	1.63942	0.101126	0.136747	55.154	0.618649	0.326565	1.89441	0.0581705	0.120367
CG12920	3.79166	0.557861	0.591223	0.943572	0.345388	0.408922	1.23993	-0.575826	0.523935	-1.09904	0.27175	NA
CG12923	0	NA	NA	NA	NA	NA	0	NA	NA	NA	NA	NA
CG12926	634.723	-0.987109	0.0583277	-16.9235	3.01889e-64	2.21215e-63	2157.81	-0.485876	0.113308	-4.2881	1.80212e-05	0.000119609
CG12929	58.2374	-0.15485	0.182873	-0.84676	0.397129	0.460326	164.799	-0.341689	0.200871	-1.70104	0.0889355	0.169322
CG12934	4192.72	0.471267	0.0237611	19.8336	1.52751e-87	1.33996e-86	8360.24	-0.458397	0.187177	-2.449	0.0143254	0.037423
CG12935	61.5995	0.132725	0.169921	0.7811	0.434743	0.498466	171.791	-0.254234	0.205721	-1.23582	0.216526	0.33863
CG12942	335.624	-0.0886805	0.0747685	-1.18607	0.235595	0.292487	338.591	0.245711	0.143709	1.70978	0.0873058	0.166806
CG12943	9.78926	-0.446451	0.409801	-1.08943	0.275962	0.335716	33.6819	0.666978	0.37763	1.76622	0.0773589	0.15155
CG12945	620.904	-0.0882254	0.0570358	-1.54684	0.121901	0.161976	870.634	-0.255093	0.092643	-2.7535	0.00589616	0.0176842
CG12947	122.233	0.317878	0.122581	2.59321	0.0095086	0.0153885	77.8604	0.097128	0.275776	0.352199	0.724689	0.816235
CG12948	322.831	-0.645187	0.0793263	-8.13333	4.17652e-16	1.41524e-15	508.224	-0.0742279	0.125944	-0.589372	0.555612	0.680462
CG12950	166.78	-0.235227	0.107667	-2.18477	0.0289058	0.0433458	183.35	0.624374	0.157535	3.9634	7.38907e-05	0.000403447
CG12951	70.1854	-6.66103	0.579239	-11.4996	1.32475e-30	6.21626e-30	664.85	1.69172	0.274606	6.16055	7.24933e-10	1.87069e-08
CG12963	765.33	0.564848	0.0500326	11.2896	1.47727e-29	6.81298e-29	1512.14	-0.507199	0.133602	-3.79633	0.000146851	0.000728865
CG12964	66.4819	0.845681	0.167301	5.05485	4.30726e-07	1.01589e-06	62.9328	0.618955	0.238042	2.60019	0.00931725	0.0261068
CG12970	7.39616	1.19369	0.471746	2.53036	0.0113945	0.0182017	1.45953	-0.136264	0.535817	-0.254311	0.799255	NA
CG12971	3.69879	1.10152	0.60707	1.81448	0.0696039	0.0972458	8.1582	-0.496189	0.522178	-0.95023	0.341996	0.481202
CG12974	1489.45	-0.0322556	0.0367939	-0.876655	0.380674	0.444395	3126.06	-0.400567	0.203619	-1.96724	0.0491554	0.104888
CG12975	56.1417	0.199339	0.178413	1.11729	0.263871	0.322701	211.872	-0.109398	0.139997	-0.78143	0.434549	0.570638
CG12983	94.3067	-1.50212	0.167975	-8.9425	3.80468e-19	1.39932e-18	265.002	1.35343	0.282268	4.79483	1.62811e-06	1.51916e-05
CG12984	4.17645	-0.401081	0.579184	-0.692492	0.488628	0.552053	17.1582	0.40396	0.398272	1.01428	0.310449	0.447021
CG12985	7.69455	0.17629	0.44998	0.391773	0.695226	0.744651	8.06982	0.125741	0.469996	0.267537	0.789056	0.864336
CG12986	0	NA	NA	NA	NA	NA	0.742226	-0.00321569	0.439417	-0.00731808	0.994161	NA
CG1299	1019.56	-0.228021	0.0434873	-5.24338	1.5766e-07	3.80053e-07	1350.44	-0.0840715	0.134571	-0.624736	0.532144	0.659956
CG12990	1.9209	-1.20564	0.745698	-1.61679	0.105924	0.142565	1.13526	-0.282012	0.507208	-0.55601	0.578204	NA
CG12991	725.673	-0.0370011	0.0530182	-0.697896	0.485242	0.548874	632.649	0.301843	0.192355	1.5692	0.116601	0.21021
CG12992	227.198	0.494997	0.0905023	5.46944	4.51463e-08	1.1219e-07	200.694	1.22383	0.259297	4.71981	2.36068e-06	2.0943e-05
CG12994	3.81175	0.00633613	0.607189	0.0104352	0.991674	0.993152	8.56843	0.00245062	0.494756	0.0049532	0.996048	0.997732
CG12995	0.724342	1.7428	0.808762	2.1549	0.0311696	0.0464348	0	NA	NA	NA	NA	NA
CG12998	0.3543	-0.167549	0.765474	-0.218882	0.826742	NA	0.187776	-0.176748	0.259051	-0.682291	0.495055	NA
CG13000	1.46892	1.1984	0.779513	1.53736	0.124204	0.164662	0.450748	0.0272218	0.337832	0.0805778	0.935778	NA
CG13001	119.8	-1.01001	0.134195	-7.52649	5.21205e-14	1.65395e-13	59.1498	-0.070047	0.229027	-0.305846	0.759722	0.84242
CG13002	0.252879	0.122228	0.705405	0.173274	0.862436	NA	0.121191	0.137331	0.246368	0.557423	0.577239	NA
CG13003	700.254	-1.33986	0.0568445	-23.5706	7.72211e-123	8.82461e-122	229.6	0.0486404	0.231912	0.209736	0.833874	0.895653
CG13004	356.737	0.151391	0.0765372	1.97801	0.0479278	0.0690726	501.15	0.131636	0.212216	0.620293	0.535065	0.662203
CG13005	96.9773	0.0678966	0.135788	0.500019	0.617061	0.672344	68.0913	0.0590978	0.245336	0.240885	0.809644	0.878716
CG13008	60.252	-0.18216	0.180811	-1.00746	0.313715	0.375525	168.714	1.4315	0.278063	5.14811	2.63127e-07	3.26624e-06
CG13010	10.6141	-0.310329	0.403909	-0.768314	0.4423	0.506008	62.4238	0.938863	0.289238	3.24599	0.00117045	0.0043613
CG13012	125.266	-0.209192	0.122647	-1.70565	0.0880732	0.120629	226.136	0.446304	0.176854	2.52357	0.0116169	0.0313975
CG13014	127.312	-0.121843	0.120902	-1.00778	0.313559	0.375438	220.979	-0.516044	0.148244	-3.48104	0.000499463	0.00207492
CG13016	190.948	-0.0915017	0.0998319	-0.916558	0.359374	0.423318	322.524	-0.0171585	0.142186	-0.120676	0.903948	0.939604
CG13018	35.1934	0.0139487	0.224341	0.0621762	0.950423	0.961874	144.674	-0.00632633	0.194536	-0.03252	0.974057	0.985625
CG13021	9.53772	0.729168	0.423964	1.71988	0.085454	0.117305	59.5562	1.51559	0.367716	4.12163	3.76208e-05	0.00022638
CG13022	0.750155	0.245398	0.815669	0.300855	0.763525	0.803399	0.662382	0.2025	0.43	0.47093	0.63769	NA
CG13023	27.1894	-4.20447	0.464993	-9.04201	1.53819e-19	5.73738e-19	70.6696	0.630968	0.328314	1.92184	0.0546256	0.114518
CG13024	370.903	2.21542	0.0811094	27.314	2.89287e-164	4.27224e-163	202.73	-0.148077	0.22359	-0.662269	0.507799	0.63869
CG13025	222.797	-0.436726	0.0951496	-4.58989	4.43481e-06	9.82515e-06	199.017	-0.104615	0.140131	-0.746551	0.455335	0.591113
CG13026	0.748169	-1.64568	0.81149	-2.02797	0.0425629	0.0619118	23.3169	1.58027	0.562722	2.80826	0.00498107	0.0153505
CG13028	61.936	-1.06436	0.184308	-5.7749	7.69983e-09	1.9988e-08	147.109	1.84164	0.262886	7.00547	2.46164e-12	1.07809e-10
CG13029	13.3239	-1.09172	0.403978	-2.70242	0.00688374	0.0113329	92.7921	1.0598	0.336107	3.15317	0.00161506	0.00575757
CG13031	0.550097	0.826743	0.805629	1.02621	0.304794	NA	0.568831	0.0918854	0.353232	0.260128	0.794765	NA
CG13032	61.5867	-1.18044	0.185236	-6.37263	1.85819e-10	5.21449e-10	283.431	0.983477	0.285546	3.4442	0.000572755	0.00234032
CG13033	56.6105	1.73486	0.195624	8.86833	7.4254e-19	2.71021e-18	22.0323	-0.418241	0.398797	-1.04876	0.29429	0.428867
CG13035	17.8063	-0.133908	0.327686	-0.408649	0.682797	0.73362	1.33475	0.122707	0.540662	0.226956	0.820458	NA
CG13036	1.39098	-0.711098	0.778963	-0.912879	0.361306	0.425146	2.43039	0.278065	0.566521	0.490829	0.623547	NA
CG13038	13.055	0.207411	0.357857	0.57959	0.562191	0.621008	25.4684	-1.14717	0.328501	-3.49214	0.000479173	0.00200335
CG13039	3.73109	-0.32265	0.603425	-0.534698	0.592858	0.649403	35.1827	1.3217	0.333063	3.9683	7.23859e-05	0.000396974
CG1304	341.88	2.72125	0.092896	29.2935	1.25392e-188	2.13851e-187	384.042	-1.2588	0.290242	-4.33706	1.44399e-05	9.90096e-05
CG13040	2.67921	1.28859	0.692147	1.86173	0.0626415	0.0882709	8.47893	1.1396	0.488957	2.33066	0.0197711	0.0490061
CG13041	14.1947	-4.3282	0.610457	-7.0901	1.34012e-12	4.06637e-12	111.553	-0.74142	0.177222	-4.18358	2.86959e-05	0.000178907
CG13042	6.42051	1.91673	0.524492	3.65446	0.000257724	0.000497137	2.1571	-0.122614	0.556799	-0.220213	0.825706	NA
CG13043	156.314	1.78131	0.117635	15.1428	8.45901e-52	5.40821e-51	258.185	-1.0971	0.346959	-3.16205	0.00156664	0.00560906
CG13044	734.77	2.53741	0.0622544	40.7586	0	0	1352.29	-0.485341	0.221934	-2.18687	0.028752	0.0669514
CG13045	7.27499	-3.13321	0.62444	-5.01764	5.23113e-07	1.22775e-06	22.3389	-0.32951	0.341383	-0.965221	0.334434	0.472715
CG13046	214.734	2.91341	0.120515	24.1746	4.11324e-129	4.90923e-128	93.8329	-0.465696	0.263898	-1.76468	0.0776176	0.151937
CG13047	30.8873	4.33574	0.408006	10.6267	2.23942e-26	9.73335e-26	9.87212	-0.586816	0.490927	-1.19532	0.231961	0.357913
CG13048	0.543201	0.822836	0.805209	1.02189	0.306832	NA	0.646661	0.433685	0.395952	1.0953	0.273386	NA
CG13049	2.98023	1.68942	0.690393	2.44705	0.0144033	0.0226525	13.3454	1.72924	0.448826	3.8528	0.000116774	0.000597958
CG13050	0.654782	0.497625	0.815231	0.61041	0.54159	0.602633	1.64104	0.390773	0.495279	0.788994	0.430115	NA
CG13051	8.65884	1.76134	0.46019	3.8274	0.000129502	0.000256616	17.5409	0.0958302	0.390233	0.245572	0.806014	0.876482
CG13053	3.01797	-2.6246	0.751417	-3.49287	0.000477853	0.000897787	6.22807	1.72301	0.536551	3.21127	0.00132148	0.00482859
CG13054	1.13228	0.0856907	0.799835	0.107135	0.914682	0.931949	1.1972	-0.0275461	0.544543	-0.0505857	0.959656	NA
CG13055	6.59521	0.526858	0.489652	1.07598	0.281934	0.34196	9.3437	0.34629	0.46668	0.742028	0.458071	0.594169
CG13056	0.104231	-0.313478	0.537925	-0.582754	0.560059	NA	1.43257	-0.463872	0.545978	-0.849617	0.395538	NA
CG13058	4.0303	1.40825	0.606511	2.32189	0.0202389	0.0311025	2.1849	0.140563	0.565371	0.248621	0.803654	NA
CG13059	29.9483	3.75179	0.36376	10.3139	6.09561e-25	2.56156e-24	16.2225	-1.81756	0.41426	-4.38749	1.14664e-05	8.09878e-05
CG13060	7.33592	-3.80545	0.684528	-5.55923	2.70961e-08	6.81536e-08	47.4233	0.201252	0.304753	0.660378	0.509011	0.63959
CG13062	0.842346	1.31401	0.815625	1.61104	0.10717	0.144101	0.329553	-0.0565734	0.315995	-0.179032	0.857912	NA
CG13063	197.183	1.71546	0.105704	16.229	3.14674e-59	2.18435e-58	227.73	-1.19531	0.307359	-3.88897	0.000100671	0.000527219
CG13064	1.47276	-2.34453	0.810568	-2.89246	0.00382243	0.00651651	17.6971	1.81824	0.416828	4.3621	1.28822e-05	8.9865e-05
CG13065	0.245154	0.110516	0.701894	0.157454	0.874887	NA	0.728803	-0.384577	0.444554	-0.865083	0.386993	NA
CG13066	2.47947	1.66071	0.710435	2.3376	0.0194082	0.0299216	1.16399	0.273637	0.527439	0.518804	0.603897	NA
CG13067	669.125	3.29523	0.0737539	44.6787	0	0	840.424	-1.2062	0.240353	-5.01846	5.20882e-07	5.76467e-06
CG13068	17.8107	4.77151	0.564143	8.45798	2.7204e-17	9.50584e-17	1.78112	-0.461032	0.562013	-0.820323	0.412032	NA
CG13069	8.94608	2.22242	0.479381	4.63602	3.55181e-06	7.91063e-06	9.44975	-0.123198	0.449112	-0.274315	0.783843	0.860877
CG1307	345.591	-0.304621	0.077921	-3.90936	9.25414e-05	0.000185843	631.131	-0.552207	0.153235	-3.60367	0.000313758	0.00139976
CG13070	0.148648	0.498865	0.579599	0.860708	0.389399	NA	0.450743	0.0492322	0.40256	0.122298	0.902663	NA
CG13071	0	NA	NA	NA	NA	NA	0.780301	-0.0200497	0.483331	-0.0414824	0.966911	NA
CG13073	181.515	2.53891	0.123339	20.5848	3.75316e-94	3.45944e-93	4.60365	0.221025	0.565466	0.390872	0.695892	0.794576
CG13074	4.16842	-0.0495089	0.578476	-0.085585	0.931796	0.945873	8.7652	0.278756	0.527771	0.528176	0.597377	0.717198
CG13075	420.976	0.416503	0.068391	6.09003	1.12893e-09	3.05695e-09	1337.03	-0.0582034	0.187953	-0.309669	0.756812	0.840484
CG13077	32.8729	1.8685	0.264868	7.05446	1.73278e-12	5.24125e-12	54.1914	0.158305	0.34253	0.462165	0.643963	0.753599
CG13078	16.0401	0.899621	0.330879	2.71888	0.00655039	0.0108093	6.54933	-0.530954	0.556776	-0.953621	0.340275	0.479097
CG13081	0.974187	-1.23344	0.814027	-1.51524	0.129712	0.171373	2.74765	0.901614	0.551056	1.63616	0.101807	NA
CG13082	88.2848	-1.04067	0.160477	-6.48489	8.87977e-11	2.52508e-10	216.588	0.617359	0.302781	2.03896	0.0414539	0.0909835
CG13083	0	NA	NA	NA	NA	NA	0	NA	NA	NA	NA	NA
CG13084	0.140458	0.481898	0.571887	0.842645	0.399427	NA	0.777193	-0.0187592	0.440562	-0.0425801	0.966036	NA
CG13085	41.5402	0.0793966	0.208175	0.381393	0.702911	0.751028	77.4515	-0.148849	0.210637	-0.706662	0.479776	0.613746
CG13086	47.4985	1.36897	0.203789	6.71757	1.84776e-11	5.38657e-11	203.042	0.358402	0.152938	2.34345	0.0191064	0.0476722
CG13088	101.692	-0.419234	0.138257	-3.03229	0.00242706	0.00423217	354.368	0.617547	0.229845	2.6868	0.00721404	0.0209989
CG13089	397.935	0.00155283	0.0681641	0.0227807	0.981825	0.98586	813.448	-0.11591	0.0926526	-1.25102	0.210927	0.332098
CG1309	734.06	0.153308	0.0518264	2.95811	0.00309535	0.00533313	1257.56	-0.151205	0.100636	-1.5025	0.132968	0.233496
CG13090	197.978	-0.108425	0.0975587	-1.11138	0.266403	0.325412	360.876	-0.314033	0.117369	-2.67561	0.00745935	0.0215967
CG13091	1.31835	-1.6052	0.800707	-2.00472	0.0449926	0.065192	2.2863	-0.295056	0.563471	-0.52364	0.600529	NA
CG13096	742.208	-0.270879	0.0524083	-5.16862	2.35827e-07	5.64028e-07	885.243	-0.385357	0.166299	-2.31726	0.0204897	0.0504057
CG13097	374.595	0.311946	0.078383	3.97977	6.89825e-05	0.000140123	356.793	-0.146421	0.145105	-1.00907	0.312941	0.449984
CG13101	128.051	0.980432	0.122567	7.99913	1.25303e-15	4.19101e-15	241.065	-0.167955	0.193947	-0.865985	0.386498	0.524696
CG13102	271.785	1.07411	0.0841587	12.763	2.63941e-37	1.37272e-36	834.011	-1.50625	0.228997	-6.57757	4.78199e-11	1.63852e-09
CG13108	26.3379	-0.670176	0.265023	-2.52874	0.0114472	0.0182794	48.4076	0.195537	0.259633	0.753128	0.451373	0.586885
CG1311	750.622	-0.108964	0.0527119	-2.06717	0.0387181	0.0567305	984.557	-0.148015	0.103436	-1.43098	0.152436	0.260174
CG13110	10.0506	-1.36407	0.445012	-3.06524	0.00217494	0.00381331	132.236	1.17013	0.260189	4.49724	6.88427e-06	5.22431e-05
CG13113	0	NA	NA	NA	NA	NA	0	NA	NA	NA	NA	NA
CG13114	0	NA	NA	NA	NA	NA	0	NA	NA	NA	NA	NA
CG13116	95.5821	-0.908024	0.149409	-6.07746	1.22103e-09	3.29638e-09	207.897	1.27414	0.318742	3.9974	6.40429e-05	0.000356884
CG13117	262.811	0.389059	0.0877844	4.43199	9.33676e-06	2.0248e-05	681.588	0.728024	0.12387	5.8773	4.17014e-09	8.85124e-08
CG13123	72.9687	0.0549686	0.160426	0.342642	0.731868	0.776779	138.704	0.271528	0.178469	1.52143	0.128153	0.226899
CG13124	3998.2	1.38506	0.0255913	54.1222	0	0	1813.03	-0.471853	0.146383	-3.22341	0.00126675	0.00465459
CG13126	120.062	0.435705	0.125005	3.48551	0.000491203	0.000920808	171.525	-0.100962	0.163198	-0.618645	0.53615	0.663106
CG13127	15.5977	-0.382191	0.33429	-1.14329	0.252917	0.311203	40.7643	1.09235	0.341082	3.20261	0.00136189	0.00495587
CG13130	0.427046	1.2087	0.764142	1.58177	0.113702	NA	0.843783	-0.299337	0.488894	-0.612274	0.540356	NA
CG13131	28.9893	-1.48025	0.27437	-5.39507	6.84968e-08	1.68533e-07	84.405	1.0523	0.368542	2.85529	0.00429974	0.0134983
CG13133	18.618	1.2136	0.321012	3.78053	0.000156492	0.000307291	2.01018	0.54242	0.563139	0.963208	0.335443	NA
CG13135	4.05636	0.552211	0.574459	0.961272	0.336415	0.399566	11.4282	0.182418	0.389203	0.468698	NA	NA
CG13137	10.8187	0.602275	0.394814	1.52547	0.127143	0.168259	23.0337	0.978264	0.386752	2.52943	0.0114247	0.030925
CG13138	6.54944	-1.1407	0.507884	-2.24599	0.024705	0.0374687	11.6129	1.03846	0.440194	2.3591	0.0183194	0.04603
CG1314	26.281	-0.0180896	0.269309	-0.0671705	0.946446	0.958066	148.027	1.62584	0.256572	6.33679	2.34603e-10	6.84976e-09
CG13142	97.8318	0.382531	0.139585	2.74049	0.00613468	0.0101557	241.495	0.688827	0.178206	3.86533	0.000110938	0.000571363
CG13144	12.9666	0.888068	0.361985	2.45332	0.0141543	0.0223	1.79613	-0.140952	0.559792	-0.251793	0.801201	NA
CG13148	29.9399	-0.567555	0.246133	-2.30589	0.021117	0.0323852	76.8444	0.709348	0.264524	2.6816	0.00732718	0.0212437
CG1315	259.884	0.828319	0.0879974	9.41299	4.8221e-21	1.86433e-20	448.158	-0.521327	0.207521	-2.51216	0.0119994	0.0322072
CG13151	133.81	-0.51064	0.125321	-4.07466	4.60826e-05	9.48108e-05	148.583	-0.00727241	0.180825	-0.0402181	0.967919	0.98128
CG13154	4.04194	0.393042	0.585943	0.670787	0.502357	0.565709	1.12998	-0.0529243	0.447067	-0.118381	0.905766	NA
CG13155	5.69731	-1.66322	0.570319	-2.91631	0.00354204	0.00607006	8.91442	1.17904	0.503768	2.34045	0.0192606	0.0480087
CG13157	5.28298	2.81389	0.627439	4.48472	7.30097e-06	1.59334e-05	0.867482	-0.162189	0.377884	-0.429202	0.667776	NA
CG13159	2.47665	1.93519	0.736153	2.62878	0.00856913	0.0139453	7.87781	0.206693	0.473593	0.436436	0.662521	0.768416
CG1316	1322.61	0.161714	0.0388797	4.15936	3.1914e-05	6.65259e-05	1858.39	0.0838777	0.0995108	0.842901	0.399284	0.537652
CG13160	550.855	1.76924	0.0648717	27.2729	8.887e-164	1.30527e-162	556.254	-1.19252	0.234161	-5.09274	3.52932e-07	4.1452e-06
CG13163	106.225	0.365682	0.13971	2.61744	0.00885932	0.0143897	248.709	-0.113099	0.127323	-0.888287	0.374386	0.513182
CG13168	44.8497	-1.05167	0.221742	-4.74276	2.10827e-06	4.76185e-06	323.955	1.2758	0.247472	5.15533	2.5318e-07	3.1643e-06
CG1317	1147.77	-0.0468635	0.0421216	-1.11258	0.26589	0.324875	628.869	-0.0228501	0.136556	-0.167331	0.867109	0.916754
CG13170	2.39346	2.24607	0.744129	3.01838	0.00254127	0.00442155	0.245484	0.235991	0.312042	0.756278	0.449482	NA
CG13171	1.95868	0.0769086	0.720275	0.106777	0.914966	0.932168	10.9819	1.32124	0.471145	2.80431	0.00504239	0.0155011
CG13175	0	NA	NA	NA	NA	NA	0	NA	NA	NA	NA	NA
CG13177	252.888	-2.20606	0.104817	-21.0467	2.44949e-98	2.33963e-97	977.368	0.384124	0.189502	2.02701	0.0426611	0.0931728
CG13178	0.939693	0.987247	0.809717	1.21925	0.22275	0.278376	2.78071	0.460957	0.564314	0.816844	0.414018	NA
CG13183	2903.66	0.723547	0.0291869	24.7901	1.14666e-135	1.42027e-134	1631.56	-0.197175	0.229455	-0.85932	0.390164	0.528577
CG13185	5183.5	0.198209	0.0215281	9.207	3.35373e-20	1.27247e-19	250.677	-0.370681	0.146229	-2.53492	0.0112471	0.0305574
CG13186	9.04619	-1.85511	0.474206	-3.91203	9.15241e-05	0.000183993	89.4656	1.07661	0.321084	3.35306	0.00079924	0.00312608
CG13188	2637.33	1.4626	0.0308232	47.4512	0	0	493.981	-0.701359	0.177143	-3.95928	7.51752e-05	0.000409024
CG13189	213.314	0.424507	0.0977431	4.34309	1.40494e-05	3.00845e-05	299.734	-0.645161	0.12593	-5.12318	3.00429e-07	3.63025e-06
CG1319	349.091	0.282985	0.0767211	3.68849	0.000225591	0.000437477	979.138	-0.191068	0.153153	-1.24756	0.212191	0.333489
CG13192	201.39	-0.0540337	0.0963018	-0.561087	0.574738	0.632588	420.195	-0.468578	0.138723	-3.3778	0.000730679	0.00289309
CG13193	1.58515	0.994903	0.762246	1.30523	0.191816	0.243811	0.350313	0.192394	0.281234	0.684106	0.493908	NA
CG13196	2.5283	1.18866	0.702341	1.69242	0.0905663	0.123769	1.95691	-0.0281388	0.56644	-0.0496765	0.96038	NA
CG13197	302.685	0.480641	0.0788745	6.09375	1.10299e-09	2.98852e-09	521.081	0.206119	0.126134	1.63413	0.102232	0.189502
CG13198	0.14613	0.493748	0.577297	0.855276	0.392398	NA	0.413626	-0.380944	0.360926	-1.05546	0.291213	NA
CG13202	2.22919	0.741866	0.709226	1.04602	0.295551	0.356513	14.7821	0.765244	0.4043	1.89276	0.0583895	0.12076
CG13203	21.1128	-1.01314	0.298877	-3.38982	0.000699388	0.00129339	4.71907	0.576482	0.556916	1.03513	0.300608	0.436132
CG13204	181.317	-1.15889	0.110738	-10.4651	1.24903e-25	5.33898e-25	38.3816	0.148923	0.333879	0.446039	0.655569	0.76317
CG13215	67.8855	0.161153	0.169118	0.9529	0.340641	0.403799	191.275	-1.13201	0.429801	-2.63379	0.00844369	0.0239942
CG13216	0.569342	-0.63838	0.808396	-0.789687	0.429711	NA	2.90081	-1.13286	0.566577	-1.99948	0.0455564	NA
CG13217	1.65584	1.75357	0.774168	2.2651	0.0235063	0.0357597	3.13271	-0.492795	0.558251	-0.882748	0.377373	NA
CG13218	2.83568	-0.134809	0.665506	-0.202566	0.839474	0.869226	2.93667	0.554036	0.56025	0.988909	0.322708	NA
CG13220	355.085	0.880192	0.0738278	11.9222	9.06538e-33	4.38394e-32	1109.09	-0.485039	0.0953465	-5.08712	3.63533e-07	4.24167e-06
CG13223	14.9674	0.827016	0.3506	2.35886	0.0183313	0.0283687	17.1385	0.370974	0.452622	0.819611	0.412438	0.550128
CG13226	4.18861	0.116198	0.58713	0.197908	0.843117	0.871454	4.33148	-0.0780881	0.560803	-0.139243	0.889258	0.931259
CG13227	62.4485	2.17882	0.196855	11.0682	1.79054e-28	8.09388e-28	73.1441	-0.693261	0.245573	-2.82304	0.00475709	0.0147553
CG13228	2.08978	0.897353	0.710899	1.26228	0.206848	0.260553	5.22554	0.467337	0.563639	0.829143	0.407024	0.545324
CG13229	60.731	0.599399	0.180653	3.31797	0.000906751	0.00165816	54.8089	-0.0476155	0.252993	-0.188209	0.850713	0.906
CG13230	370.643	3.52993	0.105344	33.5087	3.60294e-246	7.49535e-245	398.035	-1.26842	0.565155	-2.24437	0.0248085	0.059283
CG13231	0.503694	0.186962	0.803437	0.232703	0.815992	NA	1.98761	0.504559	0.561672	0.898317	0.369017	NA
CG13239	1.96006	-0.86076	0.74381	-1.15723	0.247178	0.304895	17.965	1.3929	0.47513	2.93162	0.00337203	0.0109364
CG1324	42.5974	-0.45726	0.215406	-2.12278	0.033772	0.0500068	221.258	1.28346	0.271649	4.72473	2.30426e-06	2.05894e-05
CG13243	22.1903	-1.16467	0.301192	-3.86687	0.000110242	0.000219977	179.687	1.41104	0.305472	4.61919	3.85232e-06	3.17391e-05
CG13244	7.20289	-0.711234	0.475564	-1.49556	0.134769	0.177425	84.8852	1.12193	0.348515	3.21918	0.0012856	0.00471132
CG13245	0	NA	NA	NA	NA	NA	0	NA	NA	NA	NA	NA
CG13247	11.8555	0.445394	0.370463	1.20226	0.229262	0.285785	6.44281	-0.411071	0.50355	-0.816347	0.414302	0.551841
CG13248	80.1312	0.348423	0.154415	2.25641	0.0240448	0.0365227	98.9425	-0.0879602	0.189313	-0.464627	0.642198	0.752559
CG13250	2.10205	-0.0428406	0.731271	-0.0585837	0.953284	0.963998	3.36932	0.0810202	0.552575	0.146623	0.88343	0.927031
CG13251	3.45222	0.0425714	0.606026	0.0702468	0.943997	0.956092	1.41899	0.178413	0.546542	0.32644	0.744092	NA
CG13252	1071.14	-0.00845919	0.0432911	-0.195403	0.845078	0.873078	1815.06	0.337682	0.154801	2.1814	0.0291538	0.0677786
CG13255	562.449	-0.369966	0.0602301	-6.14254	8.12113e-10	2.21424e-09	1436.16	-0.207986	0.0867768	-2.39679	0.0165392	0.0422672
CG13258	6.82348	0.434735	0.502719	0.864767	0.387167	0.450839	4.56449	0.490008	0.558932	0.876686	0.380657	0.519317
CG13272	40.9702	-2.55044	0.270734	-9.42046	4.49108e-21	1.73835e-20	72.5242	-0.173104	0.204693	-0.845673	0.397735	0.536089
CG13278	8.88808	1.2886	0.447425	2.88003	0.00397637	0.00675581	19.1186	-0.370888	0.391696	-0.946876	0.343702	0.482938
CG13280	20.1061	-0.644608	0.304002	-2.12041	0.0339716	0.0502747	48.8796	1.16417	0.335086	3.47425	0.000512278	0.00211967
CG13282	12.7952	1.11848	0.379475	2.94745	0.00320409	0.00551412	8.70469	0.372679	0.491071	0.758912	0.447905	0.583478
CG13283	68.9675	1.12568	0.168901	6.66472	2.65175e-11	7.69196e-11	58.6191	-0.86177	0.296685	-2.90466	0.00367653	0.0117585
CG13284	215.448	-1.07617	0.0997563	-10.788	3.92068e-27	1.72528e-26	229.902	0.245724	0.177333	1.38567	0.165849	0.277076
CG13285	260.725	2.14752	0.0964124	22.2743	6.56268e-110	6.84219e-109	240.406	-0.639904	0.234638	-2.72719	0.00638758	0.0189074
CG13287	14.2461	-1.50906	0.387926	-3.89009	0.000100209	0.000200672	36.9783	-0.0804687	0.351493	-0.228934	0.81892	0.884869
CG13288	7.47875	-1.03363	0.487776	-2.11906	0.0340854	0.0504153	10.7599	0.312948	0.45777	0.683636	0.494205	0.627237
CG13293	122.339	-0.837989	0.128505	-6.52108	6.98042e-11	1.99638e-10	56.5279	0.54951	0.290904	1.88897	0.0588953	0.121563
CG13295	511.692	1.02638	0.0664298	15.4506	7.47275e-54	4.88931e-53	320.41	-0.695344	0.128229	-5.42269	5.87073e-08	8.88323e-07
CG13296	1.42839	-0.355416	0.766466	-0.463708	0.642857	0.696497	1.03777	-0.434262	0.507097	-0.856369	0.391794	NA
CG13297	4.43318	2.11755	0.61882	3.42192	0.000621798	0.00115531	0	NA	NA	NA	NA	NA
CG13298	790.671	-1.13255	0.0520773	-21.7475	7.29489e-105	7.33254e-104	3066.42	0.464193	0.169209	2.74331	0.00608227	0.0181505
CG13299	1.31587	2.43245	0.812542	2.99363	0.0027568	0.00477554	1.05275	0.526918	0.515059	1.02303	0.306296	NA
CG13300	378.042	-1.3	0.078802	-16.497	3.85365e-61	2.73727e-60	34.1582	0.685936	0.302651	2.26643	0.0234252	0.0565094
CG13305	9.67928	0.648102	0.429359	1.50947	0.13118	0.173209	18.6915	-0.866389	0.357991	-2.42014	0.0155145	0.0400766
CG13306	4.3803	2.7898	0.668181	4.17522	2.97702e-05	6.22307e-05	7.14134	-0.526914	0.503006	-1.04753	0.294855	0.429439
CG13308	0.259005	0.113223	0.708277	0.159857	0.872994	NA	0	NA	NA	NA	NA	NA
CG13309	3.10497	2.30746	0.697478	3.30829	0.000938685	0.00171213	3.47306	1.89276	0.566048	3.34381	0.000826361	0.00322102
CG13310	0.249604	0.120074	0.703907	0.170582	0.864553	NA	0.621993	-0.505482	0.40328	-1.25343	0.21005	NA
CG13311	183.21	1.65781	0.108398	15.2938	8.41481e-53	5.44996e-52	451.864	0.29606	0.340202	0.870248	0.384165	0.522612
CG13312	172.062	2.8274	0.131335	21.5282	8.47204e-103	8.39025e-102	271.157	-1.83774	0.271804	-6.76125	1.36802e-11	5.17185e-10
CG13313	4.15814	1.01955	0.584643	1.74389	0.0811788	0.111859	4.2312	-1.76832	0.556529	-3.1774	0.001486	0.00535425
CG13314	35.8468	-3.01073	0.316966	-9.4986	2.12735e-21	8.29643e-21	110.368	0.739416	0.280392	2.63708	0.00836238	0.0238175
CG13315	2522.78	0.158959	0.0555168	2.86325	0.0041932	0.00710354	8737.92	-0.842705	0.206899	-4.07303	4.64062e-05	0.000270428
CG13318	71.625	1.00109	0.164094	6.10075	1.05574e-09	2.86397e-09	12.5793	0.242523	0.468388	0.517783	0.60461	0.72316
CG13319	138.55	-0.336056	0.115937	-2.8986	0.00374837	0.00639675	533.307	-0.305153	0.154044	-1.98095	0.0475967	0.102088
CG13321	1835.1	1.30205	0.0361343	36.0335	2.49997e-284	5.87362e-283	2074.71	-0.895172	0.339354	-2.63787	0.00834282	0.0237836
CG13322	449.137	-0.460153	0.0702585	-6.54943	5.77589e-11	1.65576e-10	843.002	0.392012	0.150511	2.60453	0.00919993	0.0258071
CG13323	667.23	0.484036	0.0552639	8.75864	1.97628e-18	7.13765e-18	3892	0.166443	0.221327	0.752023	0.452037	0.587491
CG13324	365.136	1.0371	0.0743103	13.9563	2.88028e-44	1.66486e-43	839.892	-0.36456	0.364531	-1.00008	0.317273	0.45427
CG13325	30.0572	-0.205044	0.252197	-0.813032	0.4162	0.479742	22.6265	-1.79925	0.503102	-3.57631	0.000348482	0.00153304
CG13326	42.2784	-1.33389	0.230046	-5.79836	6.69668e-09	1.74378e-08	147.38	1.29609	0.346168	3.74409	0.00018105	0.000873845
CG13330	36.8234	-1.12201	0.24567	-4.56713	4.94446e-06	1.09183e-05	131.324	0.918107	0.27287	3.36463	0.000766452	0.00301205
CG13331	0.252879	0.122228	0.705405	0.173274	0.862436	NA	0.375551	-0.212031	0.283222	-0.748637	0.454076	NA
CG13332	0.358792	-0.162752	0.766469	-0.21234	0.831842	NA	0.410519	-0.214913	0.285072	-0.75389	0.450915	NA
CG13334	8.53592	0.167121	0.455532	0.366871	0.713715	0.760274	13.393	0.941097	0.444687	2.11631	0.0343184	0.0778502
CG13337	44.412	0.0436172	0.204704	0.213074	0.831269	0.862259	51.0277	0.992222	0.360813	2.74996	0.00596029	0.0178336
CG13339	65.4531	0.210809	0.169575	1.24316	0.213807	0.268639	167.517	0.168002	0.177945	0.944126	0.345105	0.484253
CG13344	160.783	-0.251018	0.107713	-2.33043	0.0197832	0.0304544	160.666	0.0764099	0.274373	0.278489	0.780637	0.859177
CG13349	1756.66	-0.941627	0.0354274	-26.5791	1.18452e-155	1.6634e-154	2621.13	0.0737643	0.154833	0.476411	0.633781	0.746847
CG13358	16.0607	1.75829	0.354356	4.96193	6.97948e-07	1.62419e-06	4.7635	0.680467	0.561358	1.21218	0.225443	0.350113
CG13359	16.5356	-0.124253	0.327206	-0.37974	0.704139	0.75198	77.2015	1.13568	0.306042	3.71085	0.000206564	0.000981378
CG13360	3613.36	0.734223	0.0244569	30.0211	5.21267e-198	9.3032e-197	4718.91	-1.39102	0.228925	-6.07629	1.22993e-09	2.98786e-08
CG13361	2.16179	-0.388965	0.714275	-0.544559	0.586057	0.643308	1.82948	0.368111	0.547899	0.671859	0.501674	NA
CG13362	1.42633	-0.356535	0.777529	-0.458549	0.646558	0.699774	1.19159	0.958195	0.514651	1.86184	0.0626263	NA
CG13364	485.825	0.153437	0.0638988	2.40126	0.0163389	0.025482	1478.58	-0.308016	0.174543	-1.7647	0.0776147	0.151937
CG13365	103.486	0.557852	0.133522	4.17799	2.94093e-05	6.15337e-05	247.126	-0.576813	0.152757	-3.77601	0.000159363	0.000781875
CG13366	1600.69	-0.178917	0.0367116	-4.8736	1.09582e-06	2.52301e-06	960.335	0.105123	0.11885	0.884501	0.376426	0.515297
CG13367	166.08	-0.120686	0.108934	-1.10788	0.267913	0.327138	175.425	-0.122221	0.226706	-0.539116	0.589807	0.710166
CG13369	284.877	0.857905	0.0852227	10.0666	7.75921e-24	3.18985e-23	342.977	-0.671146	0.266003	-2.52307	0.0116334	0.0314283
CG13373	87.7821	0.0402657	0.15276	0.263588	0.792097	0.82776	129.357	0.00912625	0.229671	0.0397363	0.968303	0.98146
CG13375	33.614	0.50565	0.236041	2.14221	0.0321767	0.0477973	21.3912	0.620439	0.376232	1.64909	0.0991302	0.184827
CG13376	0.719588	-0.251798	0.815719	-0.308682	0.757564	0.798501	0	NA	NA	NA	NA	NA
CG13377	1375.63	0.599307	0.0394217	15.2025	3.40594e-52	2.18902e-51	1457.62	-0.663602	0.175677	-3.77739	0.000158478	0.00077788
CG13380	0	NA	NA	NA	NA	NA	0	NA	NA	NA	NA	NA
CG13384	916.986	-0.330071	0.0464367	-7.10799	1.17749e-12	3.58016e-12	1057.93	0.147213	0.137386	1.07153	0.283933	0.418332
CG13385	9.8329	-1.54537	0.442552	-3.49195	0.000479508	0.000900769	78.7762	1.40945	0.337855	4.17176	3.02254e-05	0.000187036
CG13386	5.40963	0.360961	0.525866	0.686413	0.492453	0.556037	5.13637	0.313995	0.537694	0.583966	0.559243	0.684149
CG1339	2.89794	0.472106	0.652797	0.723205	0.469554	0.53365	4.007	0.813013	0.566773	1.43446	0.151441	0.259024
CG13390	104.544	0.73896	0.132523	5.57607	2.46009e-08	6.20167e-08	167.722	-0.0798418	0.191686	-0.416525	0.677026	0.780503
CG13392	65.6984	1.18155	0.178987	6.60134	4.07469e-11	1.17359e-10	120.087	-0.234036	0.177796	-1.31632	0.188067	0.304779
CG13397	213.752	-1.36572	0.101251	-13.4885	1.82714e-41	1.01383e-40	448.515	-1.12045	0.122488	-9.14736	5.83411e-20	8.34077e-18
CG13398	509.575	0.364476	0.06235	5.84564	5.04635e-09	1.32431e-08	353.738	-0.28339	0.121958	-2.32367	0.0201433	0.0497615
CG1340	42.7851	-0.597533	0.211418	-2.82632	0.00470869	0.00793082	311.008	1.41759	0.30354	4.67017	3.00944e-06	2.56732e-05
CG13403	673.61	-0.446322	0.0546209	-8.17128	3.05147e-16	1.03741e-15	2462.47	-0.932355	0.209834	-4.4433	8.85898e-06	6.48928e-05
CG13404	14.6992	-1.23406	0.358478	-3.4425	0.000576373	0.00107447	43.0082	-0.2905	0.251778	-1.1538	0.248584	0.377704
CG13405	158.626	3.61124	0.160545	22.4936	4.79285e-112	5.10794e-111	143.3	1.25542	0.273585	4.58876	4.45891e-06	3.61538e-05
CG13407	0.207704	-0.644885	0.667311	-0.966393	0.333847	NA	0.33266	-0.057995	0.316619	-0.183169	0.854665	NA
CG13408	53.671	-0.15126	0.185941	-0.813482	0.415942	0.479485	13.0917	0.363571	0.458285	0.793329	0.427586	0.564098
CG13409	53.899	-0.429844	0.193425	-2.22227	0.026265	0.0397048	76.6104	0.160249	0.202498	0.791363	0.428732	0.565071
CG13422	6.9354	0.378014	0.478584	0.789859	0.42961	0.493149	31.4826	-1.11375	0.521104	-2.13729	0.0325743	0.0744915
CG13423	14.552	0.393127	0.356811	1.10178	0.270557	0.329887	61.2136	0.824956	0.281426	2.93134	0.00337506	0.0109406
CG13426	2.48728	-0.418557	0.682791	-0.613009	0.53987	0.601352	18.8106	0.90576	0.442365	2.04754	0.0406051	0.089468
CG13427	0	NA	NA	NA	NA	NA	0.124293	0.138322	0.247094	0.559797	0.575618	NA
CG13428	0	NA	NA	NA	NA	NA	0.864539	0.0415933	0.483815	0.0859695	0.931491	NA
CG13430	2.35637	-0.000731232	0.694791	-0.00105245	0.99916	0.999458	0	NA	NA	NA	NA	NA
CG13436	66.3075	-0.569504	0.170171	-3.34665	0.00081794	0.0015023	187.686	1.17433	0.262995	4.4652	7.99943e-06	5.96504e-05
CG13437	1.79509	-0.373776	0.734767	-0.5087	0.610962	0.66678	2.38965	0.651728	0.557462	1.1691	0.242364	NA
CG13438	0.286588	0.910137	0.711837	1.27858	0.201046	NA	0.175157	0.151883	0.256617	0.591866	0.55394	NA
CG1344	950.37	-0.00781231	0.045378	-0.172161	0.863311	0.888841	1168.28	0.0305081	0.10509	0.290304	0.771584	0.85165
CG13442	37.1539	-1.07039	0.233986	-4.5746	4.77122e-06	1.05531e-05	188.649	1.3824	0.276184	5.00536	5.57566e-07	6.11552e-06
CG13443	2.80013	2.13159	0.716206	2.97622	0.00291824	0.00504284	0.242381	0.177174	0.272587	0.649971	0.515711	NA
CG13445	0.950401	0.970608	0.811969	1.19538	0.23194	0.288562	1.30651	-0.892024	0.531259	-1.67908	0.0931373	NA
CG13449	42.8984	-0.067825	0.208435	-0.325402	0.744877	0.787772	119.715	1.01368	0.311316	3.25613	0.00112943	0.00423383
CG13454	3.48562	1.33886	0.62835	2.13076	0.0331089	0.0490736	1.82384	-0.873092	0.545125	-1.60164	0.109236	NA
CG13455	29.6387	-0.861853	0.256062	-3.3658	0.00076323	0.00140662	230.388	1.423	0.287341	4.95232	7.33346e-07	7.72997e-06
CG13457	47.7365	-0.629565	0.204735	-3.07503	0.00210482	0.00369954	172.27	1.54109	0.29105	5.29492	1.19069e-07	1.65103e-06
CG13458	22.529	1.87092	0.303612	6.16221	7.17372e-10	1.95911e-09	27.8496	0.379095	0.376834	1.006	0.314415	0.451272
CG13460	2615.88	-0.994201	0.0301757	-32.9471	4.65398e-238	9.4194e-237	9271.74	-1.25223	0.241027	-5.1954	2.04283e-07	2.62487e-06
CG13461	84.5788	-1.83388	0.172576	-10.6265	2.2435e-26	9.74793e-26	366.178	-0.215307	0.396029	-0.543666	0.586671	0.707693
CG13463	19.1672	0.45238	0.300173	1.50706	0.131794	0.173901	23.5714	0.993631	0.38861	2.55688	0.0105615	0.0290692
CG13465	1.18157	0.879628	0.798123	1.10212	0.270409	0.329737	1.76603	0.104578	0.556887	0.187791	0.85104	NA
CG1347	2539.97	-0.598965	0.0301274	-19.8811	5.93562e-88	5.22732e-87	901.405	0.088135	0.157212	0.560612	0.575062	0.697409
CG13471	16.0341	-0.751422	0.341699	-2.19908	0.0278726	0.0419603	128.594	1.02045	0.306157	3.33311	0.0008588	0.00333388
CG13472	595.89	0.167168	0.0591823	2.82464	0.00473343	0.0079685	172.538	0.0263194	0.193803	0.135805	0.891976	0.932929
CG13473	76.806	1.72762	0.167649	10.305	6.69023e-25	2.80793e-24	32.109	1.56185	0.403124	3.87436	0.000106903	0.000554719
CG13474	2.68388	-0.798037	0.675675	-1.1811	0.237565	0.294551	10.7038	0.471492	0.504918	0.933798	0.350408	0.489265
CG13476	45.698	1.29554	0.207928	6.23073	4.64271e-10	1.28223e-09	215.464	1.3326	0.290132	4.59307	4.36769e-06	3.5527e-05
CG13477	19.0689	-0.102177	0.312145	-0.327339	0.743411	0.786608	215.229	1.50249	0.312654	4.80559	1.54293e-06	1.44837e-05
CG13481	11.7488	-0.924261	0.387081	-2.38777	0.0169508	0.0263935	131.483	1.08782	0.291172	3.73601	0.000186964	0.000898554
CG13482	95.6376	0.477229	0.141948	3.36199	0.000773834	0.0014244	1167.77	-0.237045	0.329888	-0.718564	0.47241	0.607124
CG13484	56.2126	-0.166587	0.182569	-0.912463	0.361525	0.425329	191.603	-0.164665	0.171928	-0.957756	0.338186	0.476911
CG13488	27.8156	0.318009	0.25333	1.25532	0.209364	0.263425	119.124	1.17173	0.248164	4.72158	2.34021e-06	2.08059e-05
CG13492	15026.8	2.30012	0.0171938	133.776	0	0	1337.99	-1.14386	0.207862	-5.50298	3.73417e-08	6.01627e-07
CG13494	2.45151	-0.660344	0.692437	-0.953653	0.340259	0.403454	30.1822	1.55101	0.353475	4.38788	1.14459e-05	8.09349e-05
CG13500	0.259005	0.113223	0.708277	0.159857	0.872994	NA	0.124293	0.138322	0.247094	0.559797	0.575618	NA
CG13501	24.2157	-0.0552781	0.275725	-0.200482	0.841103	0.87031	87.511	1.03551	0.287034	3.60761	0.000309031	0.00138189
CG13502	4.47076	0.614695	0.585476	1.04991	0.293761	0.354513	3.99745	-0.473802	0.564674	-0.839072	0.401429	0.539722
CG13506	1365.55	0.827507	0.0400457	20.6641	7.29517e-95	6.74276e-94	948.244	-0.392873	0.145031	-2.70889	0.00675084	0.0198175
CG13510	595.324	0.319504	0.0563571	5.66928	1.43401e-08	3.66591e-08	2963.5	-0.329858	0.208896	-1.57905	0.114324	0.20689
CG13511	117.693	1.16809	0.127963	9.12831	6.95745e-20	2.61395e-19	104.207	-0.479766	0.370198	-1.29597	0.194985	0.313175
CG13516	278.744	0.251948	0.0833539	3.02263	0.00250591	0.00436399	540.464	0.0498693	0.135683	0.367544	0.713214	0.807184
CG13526	2.26332	-1.11917	0.719094	-1.55636	0.119622	0.159169	17.0889	0.728494	0.51733	1.40818	0.159078	0.268577
CG13527	6.86407	-2.56118	0.582098	-4.39992	1.0829e-05	2.33898e-05	35.2509	1.38744	0.355142	3.90671	9.35618e-05	0.000494149
CG13531	2132.21	-0.555166	0.0323199	-17.1772	3.93181e-66	2.9274e-65	1264.22	0.0932426	0.108387	0.860275	0.389637	0.528032
CG13532	50.5517	-0.841483	0.19335	-4.35212	1.34827e-05	2.8894e-05	92.5448	0.559039	0.205068	2.72611	0.00640859	0.0189593
CG13538	4.20221	-0.596064	0.602052	-0.990053	0.322148	0.384284	33.9791	0.811483	0.359408	2.25783	0.023956	0.0576
CG13539	6.21262	-0.768623	0.51758	-1.48503	0.137535	0.180819	53.0331	1.38962	0.338414	4.10629	4.02071e-05	0.000239854
CG1354	2318.27	0.345931	0.0306901	11.2717	1.80947e-29	8.33646e-29	3360.4	-0.423168	0.106897	-3.95864	7.53768e-05	0.000409942
CG13540	11.7082	-0.127657	0.375073	-0.340353	0.733591	0.778362	82.5951	0.595589	0.238895	2.4931	0.0126634	0.0336842
CG13541	7.19838	-0.948346	0.478574	-1.98161	0.0475234	0.0685411	50.3125	1.04564	0.342825	3.05006	0.00228799	0.00778819
CG13544	22.7068	-0.741232	0.297878	-2.48838	0.0128328	0.0203397	180.307	1.23238	0.266258	4.6285	3.68318e-06	3.06022e-05
CG13545	129.309	4.11504	0.199684	20.6077	2.3397e-94	2.15956e-93	164.881	-1.94233	0.408427	-4.75563	1.97829e-06	1.80396e-05
CG13551	1830.13	-0.206851	0.0392481	-5.27034	1.3617e-07	3.29608e-07	8957.67	-0.184084	0.0751807	-2.44856	0.014343	0.0374551
CG13557	0.256488	0.109925	0.707198	0.155437	0.876477	NA	0.716988	0.684764	0.470906	1.45414	0.145908	NA
CG13558	4.04384	-0.49751	0.586548	-0.8482	0.396327	0.459554	19.744	0.910251	0.412964	2.20419	0.027511	0.0644897
CG13559	23.8462	0.786192	0.274691	2.8621	0.00420843	0.00712845	42.8675	0.367897	0.333872	1.10191	0.270501	0.403126
CG13560	1087.09	-0.497847	0.0472566	-10.535	5.95948e-26	2.5645e-25	1909.16	-3.1668	0.124704	-25.3945	2.89945e-142	1.80317e-138
CG13561	1.53694	1.64111	0.780043	2.10387	0.0353899	0.0522276	0.829402	-0.290647	0.488512	-0.594964	0.551867	NA
CG13562	54.5707	-0.0667973	0.188722	-0.353946	0.723379	0.769443	40.1457	-0.0086384	0.29099	-0.0296862	0.976317	0.986629
CG13563	2.38774	1.1166	0.690988	1.61594	0.106107	0.142797	2.71413	0.618017	0.566785	1.09039	0.275542	NA
CG13564	2.24013	0.121481	0.706821	0.171869	0.863541	0.88888	30.165	1.02582	0.496136	2.06761	0.0386763	0.085995
CG13565	29.7111	-0.337554	0.258165	-1.30751	0.191039	0.242916	93.6142	-0.283583	0.207528	-1.36648	0.171788	0.284703
CG13566	4.79016	-0.366737	0.551319	-0.665199	0.505923	0.569248	14.6189	1.49413	0.427882	3.49192	0.000479561	0.00200362
CG13567	116.198	0.122118	0.128907	0.947332	0.34347	0.406901	356.102	-0.0130533	0.130922	-0.0997028	0.92058	0.950853
CG13575	34.0889	-1.13534	0.240311	-4.72447	2.3072e-06	5.19631e-06	74.8061	0.862993	0.366686	2.35349	0.018598	0.0465718
CG13577	31.3526	-0.203112	0.251474	-0.807684	0.419273	0.482952	154.314	0.667541	0.286478	2.33016	0.0197975	0.0490619
CG13578	12.2151	0.759919	0.372624	2.03937	0.0414131	0.0603503	5.51878	0.824021	0.538723	1.52958	0.12612	0.223746
CG13579	24.5926	-0.271622	0.270785	-1.00309	0.315818	0.377672	5.77045	0.349441	0.533377	0.655147	0.512373	0.641911
CG1358	210.185	-0.149785	0.0953827	-1.57036	0.116331	0.155266	169.74	-0.244026	0.215708	-1.13128	0.257938	0.389018
CG13581	4.88511	-2.0326	0.616964	-3.29453	0.00098587	0.00179503	49.2646	1.12355	0.390132	2.87992	0.0039778	0.0126117
CG13585	630.179	-0.601316	0.0566802	-10.6089	2.70847e-26	1.17455e-25	2203.48	-0.303971	0.124847	-2.43476	0.0149018	0.0387192
CG13587	25.565	-0.0807423	0.264899	-0.304804	0.760516	0.800985	0.32645	-0.0585888	0.315432	-0.185742	0.852647	NA
CG13589	0.209393	-0.602776	0.65021	-0.927048	0.353902	NA	0	NA	NA	NA	NA	NA
CG13590	0.294778	0.922384	0.714616	1.29074	0.196794	NA	0.124293	0.138322	0.247094	0.559797	0.575618	NA
CG13594	47.0094	-0.332063	0.201606	-1.64708	0.0995407	0.13477	15.7783	0.656176	0.400511	1.63835	0.101349	0.188147
CG13597	73.1936	-0.462848	0.161306	-2.86938	0.00411278	0.00697522	227.506	0.628906	0.261444	2.40551	0.0161499	0.0413998
CG13599	44.5739	-0.509142	0.20872	-2.43935	0.0147137	0.0231028	136.069	0.204839	0.185432	1.10466	0.269308	0.401652
CG1360	49.4351	0.49988	0.194143	2.5748	0.0100299	0.0161737	82.2389	0.173248	0.228982	0.756598	0.449291	0.584729
CG13601	216.373	0.484028	0.094818	5.10481	3.31132e-07	7.84432e-07	408.549	-0.243914	0.146641	-1.66335	0.0962432	0.180418
CG13603	355.684	-0.681051	0.0744854	-9.14341	6.05151e-20	2.27677e-19	1388.43	0.228837	0.113729	2.01213	0.0442065	0.095908
CG13604	517.118	0.240817	0.0626855	3.84167	0.0001222	0.000243044	436.846	-0.223642	0.12342	-1.81204	0.0699794	0.139662
CG13605	573.417	-0.244201	0.0608633	-4.01229	6.01326e-05	0.000122666	828.699	0.0503139	0.115673	0.434968	0.663586	0.769215
CG13606	200.244	-4.0959	0.179821	-22.7776	7.63961e-115	8.27973e-114	2565.87	0.961457	0.530652	1.81184	0.0700109	0.139685
CG13607	3063.83	0.518342	0.0284093	18.2455	2.24559e-74	1.78044e-73	1120.03	-0.714717	0.20267	-3.5265	0.000421089	0.00179551
CG13609	22.8604	0.105709	0.279628	0.378033	0.705406	0.753094	25.139	0.64166	0.353499	1.81517	0.069498	0.139018
CG13611	14.4518	-0.943363	0.351508	-2.68376	0.0072799	0.0119568	37.3037	1.07789	0.394592	2.73166	0.00630171	0.0187111
CG13613	0.610322	-0.0533559	0.812437	-0.0656738	0.947638	NA	0.205259	-0.179958	0.261374	-0.688509	0.491133	NA
CG13614	1.92552	-2.62865	0.801933	-3.27789	0.00104584	0.0018978	1.84256	0.181611	0.564452	0.321748	0.747644	NA
CG13615	0	NA	NA	NA	NA	NA	0.695593	-0.103477	0.46972	-0.220296	0.825641	NA
CG13616	4.0367	-2.28881	0.674509	-3.3933	0.00069056	0.00127759	20.8296	1.54235	0.404321	3.81467	0.000136364	0.00068391
CG13617	17.8566	-0.101537	0.319597	-0.317703	0.750711	0.792646	25.0715	0.0108769	0.385343	0.0282265	0.977481	0.987164
CG13618	42.6605	2.02131	0.231528	8.73029	2.5401e-18	9.15676e-18	24.6394	1.98882	0.375177	5.30103	1.15153e-07	1.6111e-06
CG13622	0.853091	0.0314577	0.813013	0.0386927	0.969135	0.976987	1.93942	-0.0215547	0.565758	-0.0380987	0.969609	NA
CG13623	55.0947	0.301091	0.180479	1.66829	0.0952581	0.129545	227.74	-0.139041	0.184904	-0.751964	0.452073	0.587491
CG13624	2741.15	-0.0383714	0.0285258	-1.34515	0.178578	0.228711	1602.28	-0.532393	0.191923	-2.77399	0.00553734	0.016782
CG13625	206.768	0.0628605	0.0974973	0.644741	0.519095	0.582022	105.907	-0.372741	0.2838	-1.31339	0.189051	0.305895
CG13627	8.51782	0.918143	0.441933	2.07756	0.0377497	0.0553975	13.8714	1.41994	0.437561	3.24512	0.001174	0.00436801
CG13630	471.474	-0.416659	0.069242	-6.01742	1.77215e-09	4.74705e-09	789.426	-0.412379	0.107619	-3.83184	0.000127191	0.000645714
CG13631	115.116	0.376573	0.125767	2.99422	0.00275149	0.00476695	28.4902	-0.564608	0.303215	-1.86207	0.0625933	0.127712
CG13634	0.847031	-1.726	0.813193	-2.1225	0.0337959	0.0500367	0.121191	0.137331	0.246368	0.557423	0.577239	NA
CG13636	70.5567	0.3475	0.163698	2.12281	0.0337694	0.0500068	93.8126	-0.0758613	0.217674	-0.348509	0.727458	0.818239
CG13639	16.0042	-1.39861	0.360955	-3.87474	0.000106737	0.000213174	78.7727	0.703662	0.288534	2.43875	0.0147382	0.0383582
CG13640	43.5816	2.66759	0.248985	10.7138	8.76664e-27	3.83262e-26	16.3344	-1.36507	0.398015	-3.42969	0.000604281	0.00245062
CG13641	467.918	-2.16929	0.0765843	-28.3255	1.67837e-176	2.69482e-175	3419.7	-0.363351	0.190479	-1.90757	0.0564469	0.117563
CG13643	32.7857	2.4382	0.286678	8.50498	1.81623e-17	6.38616e-17	14.3028	-0.425123	0.403263	-1.05421	0.291788	0.42612
CG13646	2.9933	0.187591	0.636993	0.294494	0.76838	0.807686	4.42929	0.542553	0.538159	1.00816	0.313375	0.450348
CG13650	59.3313	0.0604205	0.175536	0.344206	0.730692	0.775837	70.947	0.150877	0.21454	0.703259	0.481894	0.615722
CG13653	0.733178	-1.6195	0.810401	-1.99839	0.0456743	0.0661014	1.82559	-0.52942	0.527065	-1.00447	0.315153	NA
CG13654	263.012	-0.101936	0.0856564	-1.19005	0.234026	0.290824	217.673	-0.360131	0.197789	-1.82078	0.0686398	0.137634
CG13658	68.5426	1.61802	0.174576	9.26831	1.89117e-20	7.21618e-20	82.0704	0.305418	0.245713	1.24299	0.213873	0.335581
CG13659	310.523	-0.0759458	0.0767287	-0.989796	0.322274	0.384366	408.387	0.13692	0.176808	0.774398	0.438695	0.574791
CG13663	146.845	-0.190547	0.11267	-1.69119	0.0907998	0.12406	432.85	-0.0562871	0.128222	-0.43898	0.660676	0.766914
CG13667	210.298	-0.133638	0.0936401	-1.42715	0.153536	0.199901	269.246	0.070307	0.190818	0.36845	0.712538	0.806713
CG13670	0	NA	NA	NA	NA	NA	0.248586	0.178244	0.273217	0.652388	0.514151	NA
CG13671	243.217	0.0430424	0.0916505	0.469637	0.638615	0.692348	257.326	-0.039841	0.139139	-0.28634	0.774618	0.854367
CG13674	0.501188	0.189229	0.797985	0.237133	0.812554	NA	0.90396	-0.260292	0.489151	-0.532131	0.594635	NA
CG13675	12.8785	-0.446057	0.363312	-1.22775	0.21954	0.274915	30.8325	-0.288233	0.313948	-0.918091	0.358571	0.497656
CG13676	6596.69	0.0426021	0.0202367	2.10519	0.0352748	0.0520714	3071.22	-0.376909	0.142855	-2.63841	0.00832954	0.0237567
CG13678	183.109	2.03228	0.11737	17.3152	3.61035e-67	2.71361e-66	487.088	-1.39068	0.226017	-6.15299	7.60346e-10	1.95396e-08
CG13679	1.25376	0.298676	0.786035	0.379978	0.703962	0.751851	2.72522	0.341716	0.56472	0.605107	0.545108	NA
CG1368	1607.65	2.87491	0.0448481	64.1032	0	0	1085.7	-1.6097	0.232246	-6.93103	4.17781e-12	1.75553e-10
CG13685	96.2895	0.208823	0.146977	1.42079	0.155377	0.201984	42.5321	0.203041	0.303639	0.668694	0.50369	0.635321
CG13689	91.1492	0.38467	0.139859	2.75041	0.00595205	0.00987038	203.739	0.384475	0.197204	1.94963	0.0512201	0.10851
CG13690	85.4497	-0.107454	0.154962	-0.69342	0.488046	0.551628	223.415	-0.248966	0.192537	-1.29308	0.195983	0.314209
CG13692	19.9501	2.90751	0.369344	7.87209	3.48753e-15	1.15497e-14	38.6664	2.07989	0.31234	6.65905	2.75595e-11	9.69002e-10
CG13693	12.5723	-0.919325	0.37589	-2.44573	0.0144559	0.0227299	133.889	1.59164	0.318246	5.0013	5.69448e-07	6.2239e-06
CG13694	45.2892	-0.36523	0.202388	-1.8046	0.0711371	0.099089	99.0867	-1.11875	0.275134	-4.0662	4.7785e-05	0.000277474
CG13698	657.701	-0.886628	0.0564021	-15.7198	1.10722e-55	7.36264e-55	582.757	0.195657	0.134083	1.45923	0.144503	0.249421
CG13699	49.8222	3.79439	0.292144	12.9881	1.42928e-38	7.58312e-38	4.91079	0.329863	0.542997	0.607485	0.543529	0.669812
CG13700	49.8588	-0.664344	0.19791	-3.35679	0.000788529	0.00145006	237.012	1.31374	0.290525	4.52197	6.12672e-06	4.73318e-05
CG13704	255.122	0.680194	0.0866721	7.8479	4.23048e-15	1.39483e-14	987.436	-0.198876	0.194786	-1.021	0.307257	0.443348
CG13705	6885.81	4.78028	0.0343191	139.289	0	0	463.463	-2.70114	0.427847	-6.31334	2.73077e-10	7.80813e-09
CG13707	95.9428	-0.438657	0.139234	-3.15051	0.00162985	0.0028992	267.567	0.861223	0.15308	5.62598	1.84462e-08	3.27295e-07
CG13708	27.0265	0.237721	0.251428	0.945485	0.344411	0.407873	11.7697	0.747905	0.458727	1.63039	0.103019	0.190507
CG1371	2536.88	0.279082	0.0287887	9.69413	3.19346e-22	1.27237e-21	1653.43	-0.156616	0.0882123	-1.77544	0.0758247	0.149014
CG13711	70.3161	0.61457	0.169007	3.63636	0.000276522	0.000531567	0.49407	0.390164	0.381366	1.02307	0.306275	NA
CG13712	0	NA	NA	NA	NA	NA	0.175157	0.151883	0.256617	0.591866	0.55394	NA
CG13713	26.8975	0.433054	0.260167	1.66452	0.0960081	0.130447	1.61163	0.271179	0.550363	0.492727	0.622206	NA
CG13716	6.09242	2.10418	0.547225	3.84518	0.000120465	0.000239665	1.48964	-0.424803	0.545145	-0.779247	0.435834	NA
CG13720	0.463434	-0.406174	0.790994	-0.513498	0.607603	NA	0.296347	0.261357	0.325766	0.802285	0.422388	NA
CG13721	10.3595	1.10377	0.405473	2.72218	0.00648529	0.0107071	7.03056	-1.0196	0.522162	-1.95266	0.0508601	0.10797
CG13722	1058.69	-2.04616	0.0530898	-38.5415	0	0	1469.81	1.11574	0.220188	5.06721	4.03699e-07	4.63638e-06
CG13723	1.68086	-0.259215	0.74543	-0.347739	0.728036	0.773812	19.5572	1.11811	0.427295	2.61671	0.0088781	0.0250228
CG13724	0.439728	1.27367	0.773476	1.64668	0.0996235	NA	0.417538	0.341757	0.362797	0.942008	0.346189	NA
CG13725	6.09672	-1.14132	0.530785	-2.15024	0.0315362	0.0469289	83.3223	1.48133	0.379493	3.90344	9.48337e-05	0.000500229
CG13727	2.72156	1.55363	0.689956	2.25178	0.024336	0.0369507	2.63795	-0.290791	0.566754	-0.513082	0.607894	NA
CG13728	3.12935	0.290075	0.644979	0.449743	0.652896	0.705781	1.87905	0.198051	0.563008	0.351773	0.725009	NA
CG13731	13245.7	1.43736	0.0160846	89.3625	0	0	12376.2	-0.478501	0.247566	-1.93282	0.0532586	0.1122
CG13733	20.9153	-1.08743	0.313956	-3.46365	0.000532897	0.000995774	196.282	1.17257	0.24389	4.80778	1.52618e-06	1.43482e-05
CG13737	19.115	2.01284	0.337339	5.9668	2.41951e-09	6.43241e-09	17.4096	0.080316	0.39005	0.205912	0.83686	0.897487
CG13738	1.26435	0.294841	0.783882	0.376129	0.706821	0.754306	0.517328	-0.245523	0.414704	-0.592044	0.553821	NA
CG13739	38.6422	1.08182	0.224536	4.81803	1.44985e-06	3.31708e-06	0	NA	NA	NA	NA	NA
CG13741	90.6272	2.08215	0.163628	12.7248	4.30314e-37	2.22594e-36	99.7475	1.6934	0.203095	8.33799	7.55644e-17	6.76165e-15
CG13742	104.405	-0.157306	0.134628	-1.16845	0.242626	0.29994	100.949	-0.445747	0.203127	-2.19443	0.0282045	0.0658546
CG13743	153.792	1.19947	0.117379	10.2188	1.63347e-24	6.81324e-24	51.2936	-0.38555	0.261265	-1.4757	0.140024	0.243276
CG13744	0.863076	1.85347	0.811784	2.28321	0.0224181	0.034205	0.55445	0.158411	0.424075	0.373545	0.708743	NA
CG13747	25.6561	-0.852855	0.281795	-3.02651	0.00247395	0.00431002	320.139	1.42619	0.259334	5.49942	3.81038e-08	6.12195e-07
CG13748	60.5033	1.36517	0.180149	7.57801	3.50897e-14	1.11932e-13	81.3886	0.238781	0.289058	0.826066	0.408767	0.546751
CG13749	5.30468	0.397729	0.543859	0.731308	0.464591	0.528853	2.16448	-0.69654	0.56428	-1.23439	0.217059	NA
CG13751	209.97	-0.0459204	0.0968537	-0.474121	0.635414	0.689434	696.471	-0.139802	0.155146	-0.901102	0.367534	0.506704
CG13759	6.96861	-0.415558	0.470573	-0.883089	0.377188	0.441112	16.8054	0.648242	0.408367	1.5874	0.112422	0.204281
CG13760	133.752	0.00177602	0.120252	0.0147691	0.988216	0.990575	144.663	0.138692	0.188682	0.735054	0.462306	0.597713
CG13766	153.128	-0.0592814	0.117357	-0.505137	0.613463	0.669019	160.337	0.0386378	0.180153	0.214472	0.830179	0.892846
CG13771	4.94218	-0.867228	0.576356	-1.50467	0.132408	0.174608	25.8464	0.748465	0.375898	1.99114	0.0464655	0.0999894
CG13773	89.3658	0.186244	0.144299	1.29068	0.196815	0.249434	189.534	-0.212252	0.168407	-1.26035	0.207542	0.327923
CG13775	63.1776	-0.0210166	0.168159	-0.124981	0.900539	0.92033	72.8138	0.193038	0.205077	0.941295	0.346554	0.485628
CG13779	629.155	-0.790284	0.0570189	-13.86	1.10622e-43	6.32884e-43	3546.43	0.115546	0.127079	0.909249	0.363218	0.50247
CG13784	4024.56	-0.0524085	0.02571	-2.03845	0.0415047	0.0604773	2190.22	-0.0241456	0.0767278	-0.314692	0.752996	0.837949
CG13786	1.11776	0.085575	0.795169	0.107619	0.914298	0.93177	1.60832	0.527668	0.547322	0.964091	0.335001	NA
CG13793	11.7543	2.02624	0.422391	4.79706	1.61008e-06	3.67241e-06	13.5523	0.296091	0.43327	0.683385	0.494363	0.627374
CG13794	16.2198	1.13251	0.334265	3.38806	0.000703896	0.00130101	17.5367	0.769636	0.432443	1.77974	0.0751187	0.147883
CG13795	436.623	0.175426	0.0659228	2.66108	0.00778897	0.012739	1792.52	-1.01335	0.180881	-5.60231	2.11512e-08	3.67943e-07
CG13796	546.574	-3.01923	0.0840818	-35.9082	2.27184e-282	5.30979e-281	1753.48	0.509519	0.135716	3.7543	0.000173829	0.000843576
CG13800	4072.55	0.786351	0.0255572	30.7682	6.97238e-208	1.28183e-206	500.859	0.175912	0.139659	1.25958	0.207822	0.328281
CG13801	8.53715	0.0892777	0.435836	0.204843	0.837695	0.86792	21.02	0.778468	0.38582	2.0177	0.0436227	0.0948451
CG13806	75.925	0.719308	0.158042	4.55136	5.33004e-06	1.17446e-05	248.57	-1.05839	0.219291	-4.82639	1.39031e-06	1.32409e-05
CG13807	58.5351	-0.117781	0.175129	-0.672543	0.501238	0.564686	212.782	0.0588148	0.158581	0.370882	0.710725	0.805709
CG13810	45.6229	0.968486	0.199405	4.85689	1.19245e-06	2.74078e-06	77.8413	-0.245898	0.229861	-1.06977	0.284723	0.419099
CG13813	17.9964	-2.45505	0.40971	-5.99215	2.0708e-09	5.53269e-09	44.194	-0.23903	0.334779	-0.713991	0.475233	0.609645
CG13814	65.0023	0.495031	0.176012	2.81249	0.00491601	0.00825724	19.7702	-0.248304	0.367994	-0.674749	0.499836	0.632254
CG13822	46.0254	0.155525	0.19982	0.778325	0.436378	0.500211	111.895	0.422091	0.243541	1.73314	0.0830704	0.160464
CG13827	244.008	0.75099	0.088677	8.46883	2.47874e-17	8.67041e-17	409.073	-0.363765	0.141377	-2.57301	0.0100817	0.0279092
CG13829	29.8104	1.50658	0.258242	5.83397	5.41248e-09	1.4179e-08	54.9401	0.456908	0.352184	1.29736	0.194509	0.312484
CG13830	434.052	-0.224401	0.0656158	-3.41993	0.000626383	0.00116318	347.316	0.228527	0.116621	1.95957	0.0500465	0.106475
CG13833	57.5921	-2.42386	0.229226	-10.5741	3.92881e-26	1.69827e-25	151.272	0.799729	0.178339	4.48433	7.31438e-06	5.50704e-05
CG13837	1.85966	0.926223	0.742095	1.24812	0.211987	0.266546	4.23046	-0.82804	0.556361	-1.48831	0.136668	0.238652
CG13838	3.66052	-0.0906596	0.595593	-0.152217	0.879016	0.902796	30.4812	1.5912	0.401609	3.96206	7.43063e-05	0.000404651
CG13840	0.62019	-0.0589041	0.81275	-0.072475	0.942224	NA	3.48039	-0.269441	0.555402	-0.485128	0.627585	0.741724
CG13841	1.91246	1.5886	0.751844	2.11294	0.0346057	0.0511455	1.43894	-0.129468	0.535963	-0.241562	0.80912	NA
CG13842	4.78474	-0.0489627	0.55516	-0.0881957	0.929721	0.944494	6.19591	0.900551	0.554083	1.6253	0.104099	0.192144
CG13843	26.2937	0.234057	0.26183	0.893926	0.371361	0.435339	101.152	1.1809	0.258063	4.57602	4.73907e-06	3.81025e-05
CG13847	25.1032	2.02928	0.295022	6.8784	6.05269e-12	1.79484e-11	14.1238	-0.181618	0.42846	-0.423885	0.67165	0.776111
CG13850	432.122	0.611564	0.0669756	9.13115	6.77749e-20	2.54848e-19	418.885	-0.374409	0.121959	-3.06995	0.00214093	0.00735403
CG13855	20.9411	-1.12396	0.314957	-3.5686	0.000358888	0.000681903	78.4291	1.25517	0.328045	3.8262	0.000130135	0.000658768
CG13856	24.507	-1.6552	0.303817	-5.44801	5.09359e-08	1.26203e-07	97.5258	1.41562	0.273946	5.16752	2.37222e-07	2.98943e-06
CG13857	2.9115	-2.18584	0.724878	-3.01546	0.00256593	0.00446159	8.6272	0.0652031	0.459065	0.142035	0.887053	0.929578
CG13862	9.64143	3.13142	0.529269	5.9165	3.28855e-09	8.68268e-09	3.23835	0.0065538	0.566055	0.011578	0.990762	NA
CG13865	392.868	-0.348274	0.0718829	-4.84502	1.266e-06	2.90635e-06	730.15	-0.233389	0.119615	-1.95117	0.0510366	0.108234
CG13868	2336.18	0.478577	0.0300235	15.9401	3.33858e-57	2.26031e-56	1270.21	-0.930212	0.260073	-3.57674	0.000347908	0.00153124
CG13869	2.16026	1.43291	0.742687	1.92936	0.0536861	0.076591	5.89642	0.393782	0.558473	0.705106	0.480745	0.614656
CG1387	49.1423	-0.984635	0.20615	-4.7763	1.7855e-06	4.06012e-06	98.4709	1.10788	0.367692	3.01307	0.00258621	0.00867278
CG13870	20.1708	-0.535783	0.299626	-1.78817	0.0737484	0.102482	99.2477	1.11899	0.305805	3.65914	0.000253061	0.00116577
CG13871	27.447	-0.757834	0.260948	-2.90416	0.00368238	0.00629132	139.244	1.15541	0.299185	3.86185	0.000112532	0.000578137
CG13872	14.5489	-1.41492	0.371116	-3.8126	0.000137512	0.000271648	83.9881	1.54365	0.348427	4.43034	9.40867e-06	6.84758e-05
CG13875	116.259	1.79083	0.13844	12.9358	2.82598e-38	1.4911e-37	31.1704	-0.402895	0.295277	-1.36447	0.172421	0.285322
CG13876	134.469	0.341695	0.120603	2.83323	0.00460796	0.00776994	286.015	0.15443	0.157063	0.983236	0.325491	0.463529
CG13877	13.3626	0.632511	0.353863	1.78745	0.0738654	0.102613	89.3697	-0.161564	0.200687	-0.805053	0.420789	0.55821
CG13884	7.99615	-1.277	0.466907	-2.73501	0.00623778	0.0103162	71.8916	1.48671	0.320229	4.64263	3.44002e-06	2.88322e-05
CG13887	2914.3	-0.145712	0.0272869	-5.33999	9.29518e-08	2.26958e-07	7213.19	-0.292477	0.108219	-2.70263	0.00687924	0.0201469
CG13889	135.653	-0.437569	0.125546	-3.48533	0.000491532	0.000921298	15.079	0.558582	0.429167	1.30155	0.193071	0.311024
CG13890	826.306	0.0720266	0.0495771	1.45282	0.146274	0.191353	2476.45	-1.05391	0.219228	-4.80738	1.52922e-06	1.43659e-05
CG13891	24.3131	0.172693	0.270619	0.638143	0.523381	0.586192	65.7268	1.35407	0.380342	3.56013	0.000370672	0.00161766
CG13893	1428.37	-1.55773	0.0418712	-37.2028	6.14493e-303	1.56109e-301	3760.98	-0.138904	0.124296	-1.11752	0.26377	0.395607
CG13894	117.973	0.142814	0.124229	1.1496	0.250307	0.308443	117.716	0.439044	0.266517	1.64734	0.0994886	0.185301
CG13895	295.54	0.386783	0.0794079	4.87084	1.11124e-06	2.55683e-06	346.341	0.407182	0.151475	2.68812	0.00718565	0.0209293
CG13896	165.026	0.60953	0.107152	5.68844	1.28208e-08	3.28751e-08	219.223	0.434399	0.186365	2.3309	0.0197584	0.0489845
CG13897	177.693	-1.57214	0.114522	-13.7278	6.92012e-43	3.93232e-42	233.618	0.703962	0.266321	2.64328	0.00821063	0.0234659
CG13898	35.3901	-1.20568	0.242005	-4.98205	6.29143e-07	1.46815e-06	257.954	1.5196	0.321695	4.72374	2.31551e-06	2.06454e-05
CG13900	9576.79	0.45787	0.0188358	24.3085	1.5946e-130	1.9168e-129	3300.61	-0.10449	0.0888429	-1.17613	0.239545	0.366644
CG13901	115.05	-0.378623	0.1293	-2.92826	0.00340867	0.00585495	347.574	0.246616	0.141335	1.7449	0.0810023	0.157079
CG13902	192.384	0.42016	0.101233	4.15045	3.31829e-05	6.90531e-05	326.439	-0.184479	0.133762	-1.37916	0.167845	0.279549
CG13905	252.573	-1.43347	0.0952826	-15.0444	3.76003e-51	2.38917e-50	1417.34	0.636909	0.144382	4.41126	1.02771e-05	7.42747e-05
CG13907	1387.24	-0.716441	0.0400531	-17.8873	1.48173e-71	1.15237e-70	1290.33	1.18648	0.226179	5.24577	1.55634e-07	2.08147e-06
CG13912	186.171	0.817695	0.10458	7.81883	5.33146e-15	1.75054e-14	581.477	-1.07027	0.192871	-5.54914	2.87081e-08	4.79844e-07
CG13917	3950.67	0.152615	0.0250421	6.09435	1.09884e-09	2.97787e-09	642.75	0.313455	0.151548	2.06836	0.0386064	0.0858757
CG13919	43.3512	-0.0246049	0.208571	-0.117969	0.906092	0.92467	171.869	0.21903	0.17911	1.22288	0.221374	0.344539
CG13920	240.591	0.483471	0.0890514	5.42913	5.66297e-08	1.39924e-07	430.714	-0.217928	0.135154	-1.61244	0.106866	0.196279
CG13921	419.322	-0.826764	0.0689869	-11.9844	4.29118e-33	2.08569e-32	42.6696	0.341725	0.27606	1.23787	0.215766	0.337657
CG13924	81.4345	0.458278	0.161539	2.83694	0.00455477	0.00768313	33.0581	-0.36119	0.336507	-1.07335	0.283114	0.417472
CG13926	94.6921	-0.345243	0.141243	-2.44431	0.0145129	0.0228088	341.803	-0.356899	0.129003	-2.7666	0.0056645	0.0171129
CG13928	870.722	-1.55222	0.0521778	-29.7486	1.80793e-194	3.16777e-193	434.407	0.635963	0.139185	4.56919	4.89618e-06	3.91128e-05
CG13930	0.686063	1.07024	0.813906	1.31495	0.188527	0.240121	0.124293	0.138322	0.247094	0.559797	0.575618	NA
CG13931	0	NA	NA	NA	NA	NA	0.541831	0.565992	0.443411	1.27645	0.201797	NA
CG13933	679.697	-0.308285	0.0530816	-5.80777	6.33123e-09	1.65178e-08	720.591	-0.115832	0.143147	-0.809182	0.41841	0.555825
CG13936	66.5745	1.17529	0.171758	6.84272	7.77052e-12	2.29663e-11	50.4485	-1.39306	0.263397	-5.28883	1.231e-07	1.70101e-06
CG13937	94.623	1.40313	0.149539	9.38305	6.40942e-21	2.47163e-20	75.9109	-0.326655	0.217533	-1.50163	0.133192	0.233791
CG1394	40.2131	-0.382947	0.214203	-1.78777	0.0738127	0.102561	409.765	1.64036	0.2622	6.25613	3.94651e-10	1.07646e-08
CG13946	1.66572	1.74414	0.776074	2.24739	0.0246153	0.0373368	11.7558	0.415578	0.545042	0.762469	0.44578	0.581562
CG13947	117.038	0.43299	0.132678	3.26347	0.00110056	0.00199304	360.166	1.46453	0.415269	3.52671	0.000420764	0.00179474
CG13949	7.76058	-0.545489	0.460743	-1.18393	0.236439	0.293426	44.4221	0.26979	0.299795	0.899916	0.368165	0.507174
CG13950	64.3489	1.16562	0.181506	6.42193	1.34557e-10	3.80298e-10	61.5975	-0.483347	0.304198	-1.58892	0.112078	0.203899
CG13954	93.359	1.62498	0.153907	10.5582	4.65478e-26	2.00821e-25	1.59613	0.279194	0.533396	0.523428	0.600677	NA
CG13955	0.897103	-1.10961	0.815391	-1.36083	0.173567	0.223042	1.17644	-0.352026	0.535611	-0.657241	0.511026	NA
CG13957	307.306	-0.271684	0.0810036	-3.35397	0.000796613	0.00146433	264.651	-0.395721	0.123512	-3.2039	0.00135578	0.00493654
CG13962	587.312	-1.25311	0.0604436	-20.7319	1.78672e-95	1.66171e-94	7305.2	0.609323	0.135463	4.49809	6.85682e-06	5.21303e-05
CG13965	0.545933	0.795279	0.801238	0.992563	0.320923	NA	0	NA	NA	NA	NA	NA
CG13970	6.41076	1.1265	0.496304	2.26978	0.0232207	0.0353572	22.1188	1.37615	0.404705	3.40038	0.000672926	0.00268781
CG13972	1.06966	-0.292483	0.80766	-0.362137	0.71725	0.763737	0.366674	0.321336	0.354161	0.907318	0.364239	NA
CG13978	47.3868	-0.92038	0.220523	-4.17362	2.99801e-05	6.26306e-05	362.365	1.18875	0.314574	3.77891	0.000157517	0.000773773
CG13982	7.10824	0.290762	0.474211	0.613149	0.539778	0.601299	5.86129	0.97475	0.521615	1.86872	0.0616624	0.126144
CG13983	1.05689	-1.94011	0.815887	-2.37791	0.0174109	0.027047	0	NA	NA	NA	NA	NA
CG13984	13.4687	-0.179061	0.357093	-0.501442	0.61606	0.671416	29.162	1.06016	0.424474	2.49758	0.0125043	0.0333429
CG13989	6.55417	-1.00709	0.519606	-1.93818	0.052601	0.0752187	54.3512	1.0165	0.373482	2.72169	0.00649489	0.0191677
CG1399	4408.73	-0.548631	0.0234371	-23.4087	3.48859e-121	3.92985e-120	2050.3	0.455145	0.191121	2.38145	0.0172447	0.0437734
CG13991	121.683	-1.51007	0.1364	-11.0708	1.73758e-28	7.85711e-28	38.7738	1.15154	0.373364	3.08423	0.0020408	0.00705293
CG13992	45.9818	0.0593554	0.19754	0.300473	0.763816	0.803643	18.3624	-0.340074	0.531376	-0.639988	0.522181	0.65145
CG13993	292.04	0.0518586	0.0791458	0.655229	0.51232	0.575531	873.56	-0.110181	0.142885	-0.771119	0.440637	0.576545
CG13994	133.193	0.154448	0.124484	1.2407	0.214716	0.269604	454.36	0.0923584	0.175844	0.525228	0.599425	0.718961
CG13995	45.8365	-0.298534	0.208694	-1.43049	0.152576	0.198783	38.3598	0.153468	0.30318	0.506193	0.612721	0.729355
CG13996	0.311177	-0.874428	0.727894	-1.20131	0.22963	NA	0.245484	0.235991	0.312042	0.756278	0.449482	NA
CG13998	0.259005	0.113223	0.708277	0.159857	0.872994	NA	0	NA	NA	NA	NA	NA
CG13999	11.8867	-1.0249	0.393064	-2.60746	0.00912172	0.0147927	39.9409	0.407715	0.270196	1.50896	0.13131	0.231168
CG14000	7.80452	-1.1152	0.471863	-2.3634	0.0181082	0.0280526	49.0286	1.48473	0.32087	4.62721	3.70618e-06	3.07521e-05
CG14005	127.206	0.389108	0.118449	3.28504	0.00101968	0.00185357	137.794	0.0420972	0.165005	0.255127	0.798625	0.871711
CG14006	13.68	-1.75899	0.397389	-4.42637	9.58336e-06	2.07694e-05	113.02	1.56623	0.307586	5.092	3.54313e-07	4.15749e-06
CG14007	0.792805	0.755595	0.8154	0.926656	0.354105	0.417953	0.380416	-0.0280136	0.324338	-0.0863716	0.931171	NA
CG14010	20.1585	-1.12996	0.319584	-3.53573	0.000406652	0.000768959	10.5125	-0.0693995	0.467661	-0.148397	0.882029	0.925952
CG14011	24.7187	-1.29376	0.287204	-4.50469	6.64706e-06	1.45346e-05	7.82396	0.572948	0.544825	1.05162	0.292975	0.427451
CG14013	12.952	-1.18096	0.384573	-3.07083	0.00213467	0.00374809	87.8348	1.65772	0.312704	5.30125	1.15011e-07	1.61093e-06
CG14014	0.884354	0.471665	0.81387	0.579533	0.562229	0.621008	2.99841	-0.0774314	0.565378	-0.136955	0.891066	NA
CG14015	37.2186	-0.518641	0.223382	-2.32177	0.0202456	0.0311091	24.4858	0.182264	0.375584	0.485282	0.627476	0.741666
CG14017	8.72529	-1.20573	0.457654	-2.63459	0.008424	0.0137258	72.2398	1.39865	0.337767	4.14085	3.46017e-05	0.000210812
CG1402	24.1736	-0.535981	0.275149	-1.94796	0.0514192	0.0736306	15.4595	0.497422	0.413905	1.20178	0.22945	0.35505
CG14020	11.5256	-0.663701	0.388423	-1.7087	0.0875056	0.119876	41.6812	0.921402	0.296358	3.10909	0.00187667	0.00655858
CG14022	23.5434	2.28174	0.316757	7.20344	5.87141e-13	1.80356e-12	73.701	-0.316621	0.360717	-0.877754	0.380077	0.518811
CG14024	63.4963	-0.693397	0.172858	-4.01136	6.03696e-05	0.000123131	37.603	0.327268	0.291603	1.12231	0.261732	0.393215
CG14034	0.510637	0.0903361	0.621339	0.145389	0.884404	NA	0.383524	-0.0294022	0.324857	-0.0905081	0.927883	NA
CG14036	7.97863	-0.94039	0.469081	-2.00475	0.04499	0.065192	50.4166	0.722088	0.274718	2.62847	0.00857698	0.024323
CG14040	223.083	-0.0281888	0.0920934	-0.30609	0.759536	0.800142	435.417	0.0171942	0.151224	0.1137	0.909476	0.943379
CG14042	0	NA	NA	NA	NA	NA	0	NA	NA	NA	NA	NA
CG14043	546.688	0.00782197	0.0591059	0.132338	0.894717	0.915687	618.57	0.107422	0.104661	1.02638	0.30471	0.440696
CG14044	2.76582	-0.865578	0.670734	-1.29049	0.196879	0.249492	3.53838	-0.806099	0.561612	-1.43533	0.151192	0.258706
CG14050	60.3112	-1.97544	0.203642	-9.70057	2.99823e-22	1.19493e-21	63.1686	0.290315	0.230913	1.25724	0.208665	0.329362
CG14052	1.07181	-0.322942	0.803253	-0.402043	0.687652	0.737833	2.52832	0.799265	0.566411	1.41111	0.158213	NA
CG14053	11.1896	-1.13599	0.400466	-2.83666	0.00455882	0.007689	71.4972	1.25071	0.354334	3.52975	0.00041596	0.00177913
CG14054	9.97125	-0.170588	0.417872	-0.408229	0.683105	0.733833	35.6766	0.964641	0.341984	2.82072	0.00479157	0.01484
CG14057	46.6159	0.0830003	0.197987	0.419221	0.675054	0.726213	151.334	0.171502	0.163185	1.05097	0.293273	0.427786
CG14061	0.103473	-0.31144	0.537018	-0.579943	0.561953	NA	0.175157	0.151883	0.256617	0.591866	0.55394	NA
CG14062	14.3568	-5.03414	0.689472	-7.30144	2.84696e-13	8.82387e-13	74.3177	0.991831	0.479689	2.06765	0.0386728	0.085995
CG14069	0.140458	0.481898	0.571887	0.842645	0.399427	NA	0.187776	-0.176748	0.259051	-0.682291	0.495055	NA
CG1407	603.355	-0.133344	0.0558439	-2.38779	0.0169498	0.0263935	1084.01	-0.0982518	0.118159	-0.831521	0.405679	0.54385
CG14070	9.07152	-0.886885	0.451133	-1.9659	0.0493097	0.0709045	92.8871	0.70256	0.329395	2.13288	0.0329347	0.0751912
CG14071	5.16495	-0.686273	0.537044	-1.27787	0.201295	0.254487	59.0266	1.17371	0.345769	3.39449	0.000687558	0.0027401
CG14072	6.49078	-0.368461	0.496257	-0.74248	0.457796	0.521702	36.5602	0.557997	0.297924	1.87295	0.0610753	0.125211
CG14073	2602.45	-0.204767	0.02821	-7.25867	3.90911e-13	1.20575e-12	718.986	0.0617196	0.134904	0.457507	0.647307	0.756621
CG14074	56.6325	-0.060995	0.185501	-0.328813	0.742297	0.785614	72.4412	-0.05479	0.236546	-0.231625	0.816829	0.883224
CG14075	29.0411	0.0316077	0.253734	0.12457	0.900864	0.920522	79.0127	-0.25155	0.25015	-1.0056	0.314609	0.451443
CG14077	19.6972	-0.778528	0.305987	-2.54432	0.010949	0.0175443	101.975	1.26194	0.303744	4.15462	3.25823e-05	0.000199733
CG14079	6.76578	-0.102342	0.485691	-0.210715	0.83311	0.863901	18.7337	0.218691	0.383925	0.569618	0.568937	0.692953
CG14082	16.8185	-0.259284	0.319223	-0.812235	0.416657	0.480104	1.18345	0.341149	0.539707	0.632101	0.527321	NA
CG14085	1.55917	0.653624	0.755366	0.865308	0.38687	0.450533	3.51399	-0.309546	0.566424	-0.546492	0.584728	0.705827
CG14086	1.50261	0.312757	0.761659	0.410626	0.681347	0.732237	1.88705	-0.067001	0.528493	-0.126777	0.899117	NA
CG14087	25.0012	-0.21164	0.26902	-0.786708	0.431453	0.495073	54.9362	0.471715	0.332743	1.41765	0.156292	0.265026
CG14088	0.592052	-0.259032	0.624696	-0.414652	0.678397	NA	0.29945	0.262843	0.326523	0.804974	0.420835	NA
CG14089	16.7957	0.739064	0.341011	2.16727	0.0302143	0.0451367	1.89904	-0.605136	0.560464	-1.07971	0.280273	NA
CG1409	1.24678	-0.984984	0.800393	-1.23063	0.218463	0.273771	22.1667	0.781599	0.435179	1.79604	0.072488	0.143476
CG14095	2.86259	0.272806	0.643329	0.424054	0.671526	0.722839	7.31821	-0.583516	0.476919	-1.22351	0.221136	0.344241
CG14096	0.890801	1.95271	0.814537	2.39733	0.0165152	0.025745	0	NA	NA	NA	NA	NA
CG14100	107.103	0.11348	0.13745	0.825611	0.409025	0.472322	194.474	-0.206808	0.14375	-1.43866	0.150245	0.257581
CG14101	0	NA	NA	NA	NA	NA	0	NA	NA	NA	NA	NA
CG14102	68.9844	-0.14294	0.163555	-0.873955	0.382143	0.445994	107.362	0.0489677	0.193597	0.252936	0.800317	0.8725
CG14103	372.937	-0.192537	0.0712133	-2.70367	0.00685793	0.0112918	901.304	0.02411	0.099059	0.24339	0.807703	0.877398
CG14104	21.8347	0.499854	0.287615	1.73793	0.0822238	0.113171	126.463	0.0387788	0.202236	0.19175	0.847938	0.904119
CG14105	24.5995	3.70846	0.392099	9.45797	3.1399e-21	1.22033e-20	5.6345	-0.997908	0.533735	-1.86967	0.0615295	0.125914
CG14106	6.62298	-0.913616	0.496122	-1.84151	0.0655463	0.0920167	29.6013	0.876641	0.436664	2.00759	0.0446871	0.0967419
CG14107	6.81002	0.677341	0.477264	1.41922	0.155835	0.202502	9.64023	0.499716	0.467942	1.0679	0.285565	0.419891
CG14109	309.826	-1.3115	0.0881465	-14.8787	4.53406e-50	2.83939e-49	1077.15	0.836217	0.159351	5.24766	1.54044e-07	2.06243e-06
CG14110	0.150622	0.502817	0.581363	0.864893	0.387097	NA	1.13062	0.163324	0.465413	0.350922	0.725647	NA
CG14111	0.421374	0.570959	0.607554	0.939767	0.347337	NA	1.84712	0.890242	0.54148	1.64409	0.100158	NA
CG14113	10.4874	-1.36643	0.427443	-3.19676	0.00138982	0.00248872	132.495	1.28345	0.312394	4.10844	3.98345e-05	0.000237745
CG14115	0	NA	NA	NA	NA	NA	0.329553	-0.0565734	0.315995	-0.179032	0.857912	NA
CG14117	99.8715	0.519113	0.134689	3.85416	0.000116129	0.000231243	199.789	0.27042	0.152553	1.77263	0.0762905	0.149705
CG14118	55.8081	-2.73383	0.245531	-11.1344	8.53544e-29	3.88445e-28	119.633	0.718183	0.232745	3.08571	0.00203067	0.00702378
CG14120	4042.79	1.83635	0.0251064	73.1426	0	0	1565.11	-1.24348	0.232412	-5.35034	8.77888e-08	1.26379e-06
CG14125	0.844875	1.29907	0.815917	1.59216	0.11135	0.149203	3.97367	0.355376	0.561079	0.63338	0.526486	0.655236
CG14126	23.6842	0.822221	0.27368	3.00432	0.00266176	0.00461804	1.63142	-0.302786	0.546241	-0.554309	0.579367	NA
CG14127	0.813953	1.21933	0.815109	1.49591	0.134676	0.177321	0.971348	0.148457	0.497805	0.298223	0.765533	NA
CG14128	39.872	-0.958022	0.225002	-4.25784	2.06412e-05	4.37122e-05	384.954	1.4856	0.266485	5.5748	2.47813e-08	4.25144e-07
CG14130	93.2444	0.886993	0.140765	6.30124	2.95268e-10	8.22064e-10	162.44	-0.360254	0.195627	-1.84153	0.0655433	0.132493
CG14131	976.034	0.855091	0.0449964	19.0035	1.59401e-80	1.32973e-79	736.769	0.00786748	0.113544	0.0692902	0.944759	0.966517
CG14132	698.443	0.973679	0.0552451	17.6247	1.59178e-69	1.21752e-68	1098.51	-0.222873	0.221037	-1.00831	0.313307	0.450302
CG14135	82.0829	-0.313977	0.153121	-2.05051	0.0403144	0.0588961	228.135	0.268284	0.140162	1.91411	0.0556066	0.116233
CG14137	0.90562	0.478447	0.81406	0.58773	0.556714	0.61608	0	NA	NA	NA	NA	NA
CG14141	7.34783	0.520955	0.456934	1.14011	0.25424	0.312516	36.1739	-0.581773	0.279868	-2.07874	0.0376413	0.0840393
CG14142	7.10103	0.291985	0.480707	0.607407	0.543581	0.604433	2.88627	-0.344536	0.566243	-0.60846	0.542882	NA
CG14143	42.8327	1.2952	0.231314	5.59932	2.15196e-08	5.44637e-08	90.5528	-0.707153	0.384021	-1.84144	0.0655564	0.132498
CG14147	3.21297	3.4981	0.77181	4.53234	5.83348e-06	1.28245e-05	2.00527	0.792661	0.561565	1.41152	0.158091	NA
CG14151	6.68384	-0.685179	0.49354	-1.38829	0.165048	0.213338	85.0605	1.28549	0.334934	3.83804	0.000124021	0.000631945
CG14153	6.95956	-1.67305	0.525977	-3.18085	0.00146846	0.00262428	13.5578	1.31279	0.42516	3.08776	0.00201673	0.00698915
CG14154	9.02806	-0.781962	0.432401	-1.80842	0.0705411	0.0983914	141.063	1.67944	0.313612	5.35514	8.54918e-08	1.24078e-06
CG1416	1062	-0.0146348	0.04368	-0.335047	0.73759	0.781556	2323.95	-0.161323	0.0938365	-1.71919	0.0855791	0.164112
CG14160	157.389	0.922703	0.11455	8.05499	7.94841e-16	2.67448e-15	95.7546	-0.498371	0.245129	-2.0331	0.0420427	0.0920322
CG14164	0	NA	NA	NA	NA	NA	0	NA	NA	NA	NA	NA
CG14168	1.20167	0.872367	0.797457	1.09394	0.273983	0.33364	0.329558	-0.0600165	0.316072	-0.189883	0.849401	NA
CG14174	62.0452	-0.158445	0.17333	-0.914125	0.360651	0.424506	118.439	0.423351	0.206376	2.05136	0.0402322	0.088709
CG14177	8.88826	0.467729	0.444554	1.05213	0.29274	0.353534	0	NA	NA	NA	NA	NA
CG1418	260.922	0.320527	0.0856298	3.74317	0.000181712	0.000354895	559.298	0.286758	0.158233	1.81224	0.0699484	0.139662
CG14180	83.8998	0.405087	0.14782	2.7404	0.00613641	0.0101573	56.939	0.597494	0.27608	2.1642	0.0304486	0.0703418
CG14182	58.3234	-0.199791	0.176987	-1.12884	0.258964	0.317538	193.586	-0.0173445	0.162372	-0.106819	0.914932	0.946277
CG14183	105.324	-0.612116	0.137307	-4.45801	8.27231e-06	1.79918e-05	285.056	1.32855	0.256066	5.1883	2.12219e-07	2.71661e-06
CG14184	176.946	-0.364886	0.102308	-3.56654	0.000361725	0.000686807	834.164	-0.155386	0.119777	-1.2973	0.19453	0.312484
CG14185	0.703219	-0.262845	0.815938	-0.322138	0.747348	0.789696	0.846886	-0.340812	0.51242	-0.665102	0.505985	NA
CG14186	143.135	0.67019	0.118267	5.66673	1.45548e-08	3.72007e-08	25.0284	0.580245	0.366203	1.58449	0.113082	0.205091
CG14187	0.349385	-0.174936	0.764346	-0.22887	0.81897	NA	0	NA	NA	NA	NA	NA
CG14190	17.976	-0.760391	0.31871	-2.38584	0.0170402	0.0265142	66.5353	1.1214	0.315548	3.55382	0.000379673	0.00165002
CG14191	54.9321	3.01137	0.237727	12.6673	8.96973e-37	4.61678e-36	3.06374	-0.573743	0.562586	-1.01983	0.307808	NA
CG14194	692.959	-0.642117	0.0568716	-11.2906	1.45957e-29	6.73366e-29	1137.73	0.127031	0.101186	1.25542	0.209325	0.330213
CG14195	180.416	0.350276	0.10312	3.39678	0.00068185	0.001262	52.6117	0.0115365	0.410762	0.0280856	0.977594	0.987198
CG14196	193.13	0.496314	0.109874	4.5171	6.26934e-06	1.37467e-05	175.916	-1.13415	0.171814	-6.60107	4.08213e-11	1.40647e-09
CG14200	2446.95	0.0517153	0.030961	1.67034	0.0948526	0.129059	169.445	0.00736972	0.182226	0.0404429	0.96774	0.98128
CG14204	3.94691	-0.830064	0.60118	-1.38072	0.167364	0.215875	11.9771	-1.64658	0.553558	-2.97455	0.00293418	0.00967534
CG14205	1686.9	4.40499	0.0606982	72.572	0	0	1124.32	-0.670285	0.385865	-1.73709	0.0823705	0.159355
CG14207	4728.25	-0.605094	0.0225466	-26.8375	1.18168e-158	1.69123e-157	15531.7	0.142695	0.0967533	1.47483	0.140257	0.243512
CG1421	3.80271	-1.63578	0.645638	-2.53359	0.0112901	0.0180478	29.811	1.25294	0.38423	3.26092	0.0011105	0.00417546
CG14210	80.7146	-0.246922	0.153633	-1.60723	0.108005	0.14509	277.129	-0.246685	0.120778	-2.04247	0.0411047	0.0904245
CG14212	6.53451	-0.764088	0.506937	-1.50726	0.131743	0.17385	13.3725	0.898822	0.46701	1.92463	0.0542754	0.113976
CG14215	1616.54	-0.100492	0.0348317	-2.88508	0.00391311	0.00666096	196.208	0.246101	0.276609	0.889708	0.373623	0.512418
CG14218	1.61342	2.67685	0.805964	3.32131	0.000895969	0.00163934	0.615261	0.475409	0.410744	1.15743	0.247095	NA
CG14219	80.7867	1.00044	0.151594	6.59943	4.12747e-11	1.18854e-10	67.4439	-0.401821	0.39193	-1.02524	0.305252	0.441321
CG14220	248.729	-0.119779	0.0871925	-1.37373	0.169527	0.21835	292.654	-0.107116	0.205969	-0.520059	0.603022	0.721677
CG14221	17.4022	0.348274	0.322222	1.08085	0.279764	0.33976	2.91601	-0.534138	0.566652	-0.94262	0.345875	NA
CG14222	321.048	0.0939165	0.0771601	1.21716	0.223542	0.279277	701.84	-0.220343	0.136993	-1.60842	0.107743	0.197586
CG14223	233.94	-0.895608	0.0996493	-8.9876	2.52677e-19	9.34947e-19	64.0062	0.3363	0.230241	1.46064	0.144113	0.248921
CG14227	0.997229	0.271534	0.80332	0.338015	0.735352	0.779738	1.39919	-0.322951	0.476781	-0.677357	0.49818	NA
CG14229	136.455	-0.308779	0.122763	-2.51525	0.0118948	0.0189603	286.749	0.212489	0.155036	1.37058	0.170505	0.283105
CG14230	240.765	0.329312	0.0890535	3.69791	0.000217384	0.000422231	118.401	-0.35926	0.281674	-1.27544	0.202152	0.321739
CG14231	197.296	0.169099	0.0968115	1.74668	0.0806927	0.111224	55.7228	0.0148175	0.233333	0.0635039	0.949365	0.969555
CG14232	253.599	-0.146117	0.0891694	-1.63864	0.101288	0.136943	116.64	0.421837	0.192221	2.19455	0.0281962	0.0658476
CG14234	150.22	-0.422894	0.111151	-3.80468	0.000141987	0.000280036	42.9796	-0.165743	0.272733	-0.607711	0.543379	0.669693
CG14237	4.27601	-0.4589	0.576501	-0.796009	0.426027	0.489851	35.9105	-0.674354	0.469294	-1.43696	0.150731	0.258128
CG14238	3.23852	0.208347	0.639692	0.325699	0.744652	0.787673	2.83497	0.148435	0.545275	0.272221	0.785452	NA
CG14239	2.80822	1.15094	0.672044	1.71259	0.0867874	0.118905	1.16773	0.637385	0.530475	1.20154	0.229543	NA
CG14244	0	NA	NA	NA	NA	NA	0.121191	0.137331	0.246368	0.557423	0.577239	NA
CG14245	22.427	-0.77461	0.285561	-2.7126	0.00667586	0.0110028	204.601	1.87557	0.222521	8.42876	3.49344e-17	3.26703e-15
CG14246	0.252121	0.123383	0.705039	0.175002	0.861078	NA	0.484123	0.0845029	0.405551	0.208366	0.834943	NA
CG14247	64.6602	1.68151	0.180617	9.3098	1.28071e-20	4.90354e-20	93.2132	-0.553842	0.418074	-1.32475	0.185255	0.301324
CG14252	87.4045	-0.163206	0.146927	-1.1108	0.266655	0.325691	182.667	0.0449883	0.186139	0.241691	0.809019	0.878291
CG14253	761.583	0.856163	0.0515802	16.5987	7.12474e-62	5.10391e-61	625.429	-0.760604	0.167777	-4.53343	5.80334e-06	4.52836e-05
[truncated: 13,241 more rows]
