# Supplementary figures and images for: Histone gene replacement reveals a post-transcriptional role for H3K36 in maintaining metazoan transcriptome fidelity
Source: eLife journal article supplement (doi:10.7554/elife.23249), 2017-03-27

Figure 4-Supplement 1

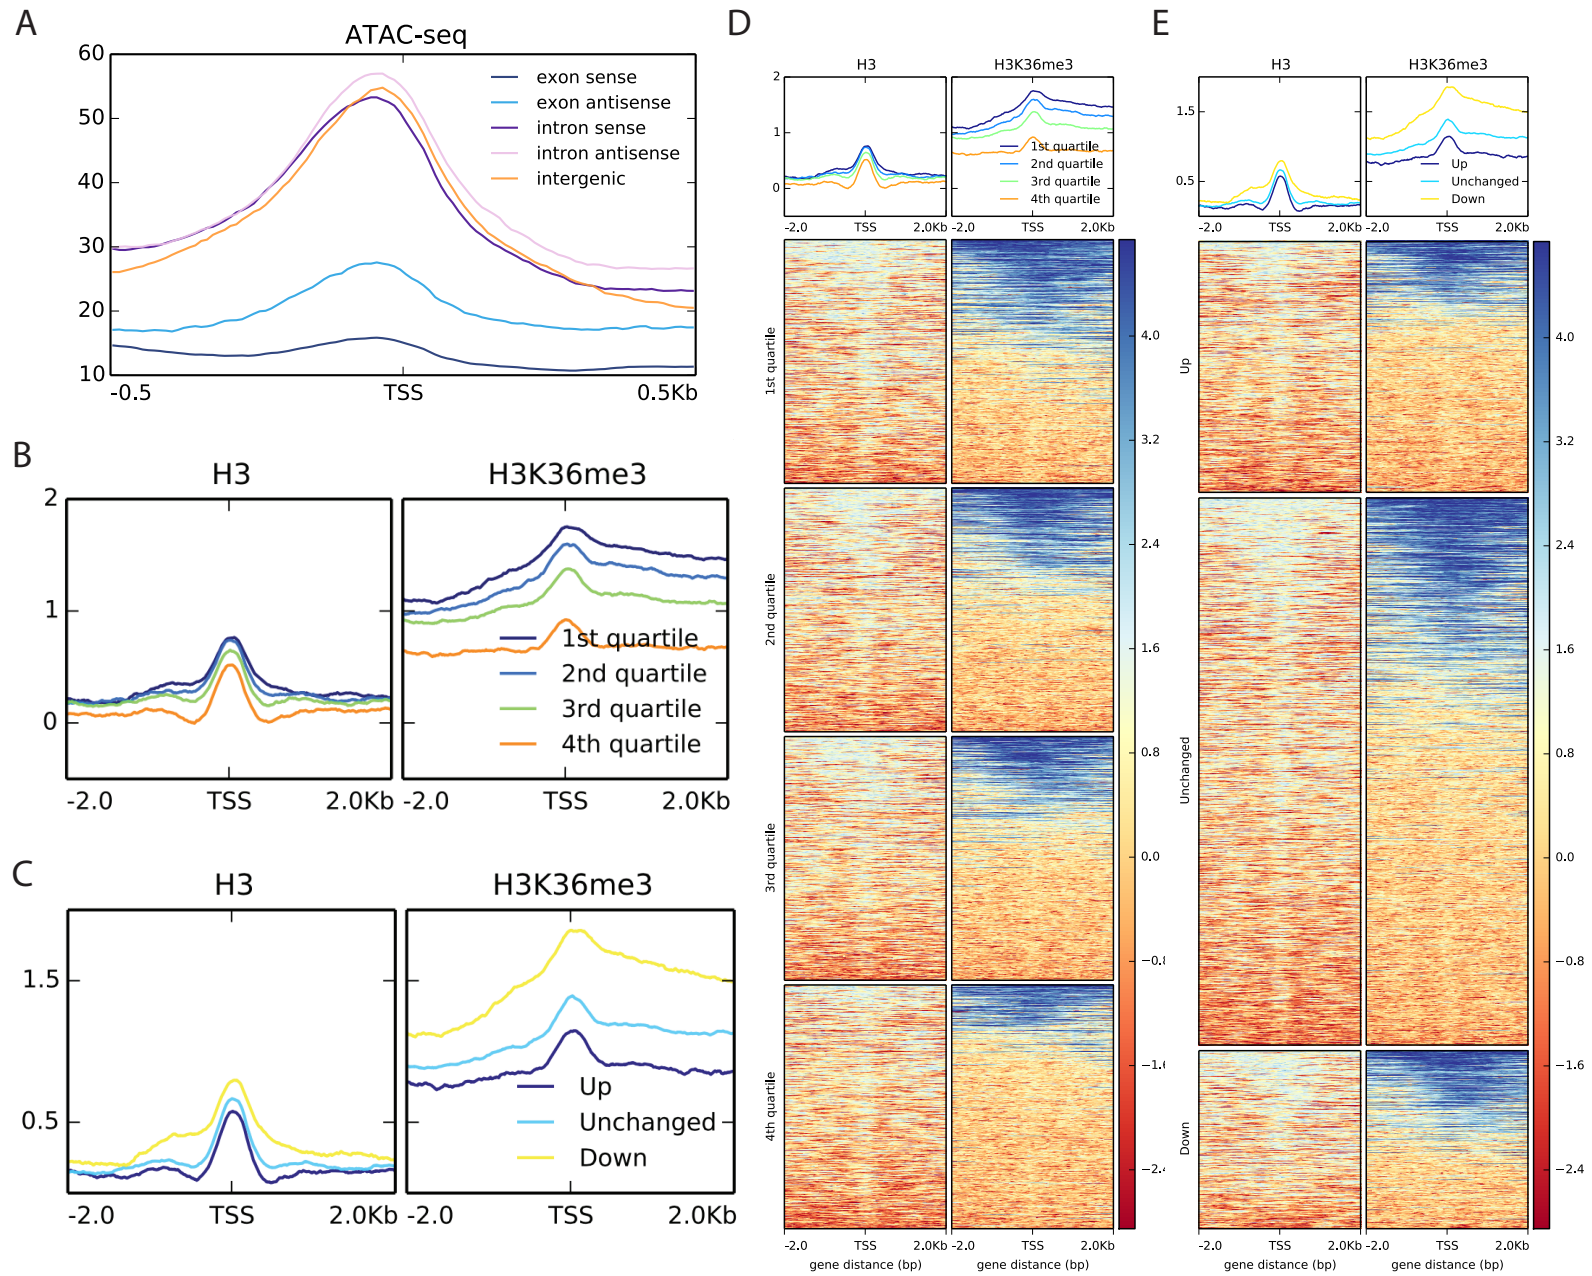

Supplement: supp [file elife-23249-supp-v1.zip]

Figure 6-Supplement 1

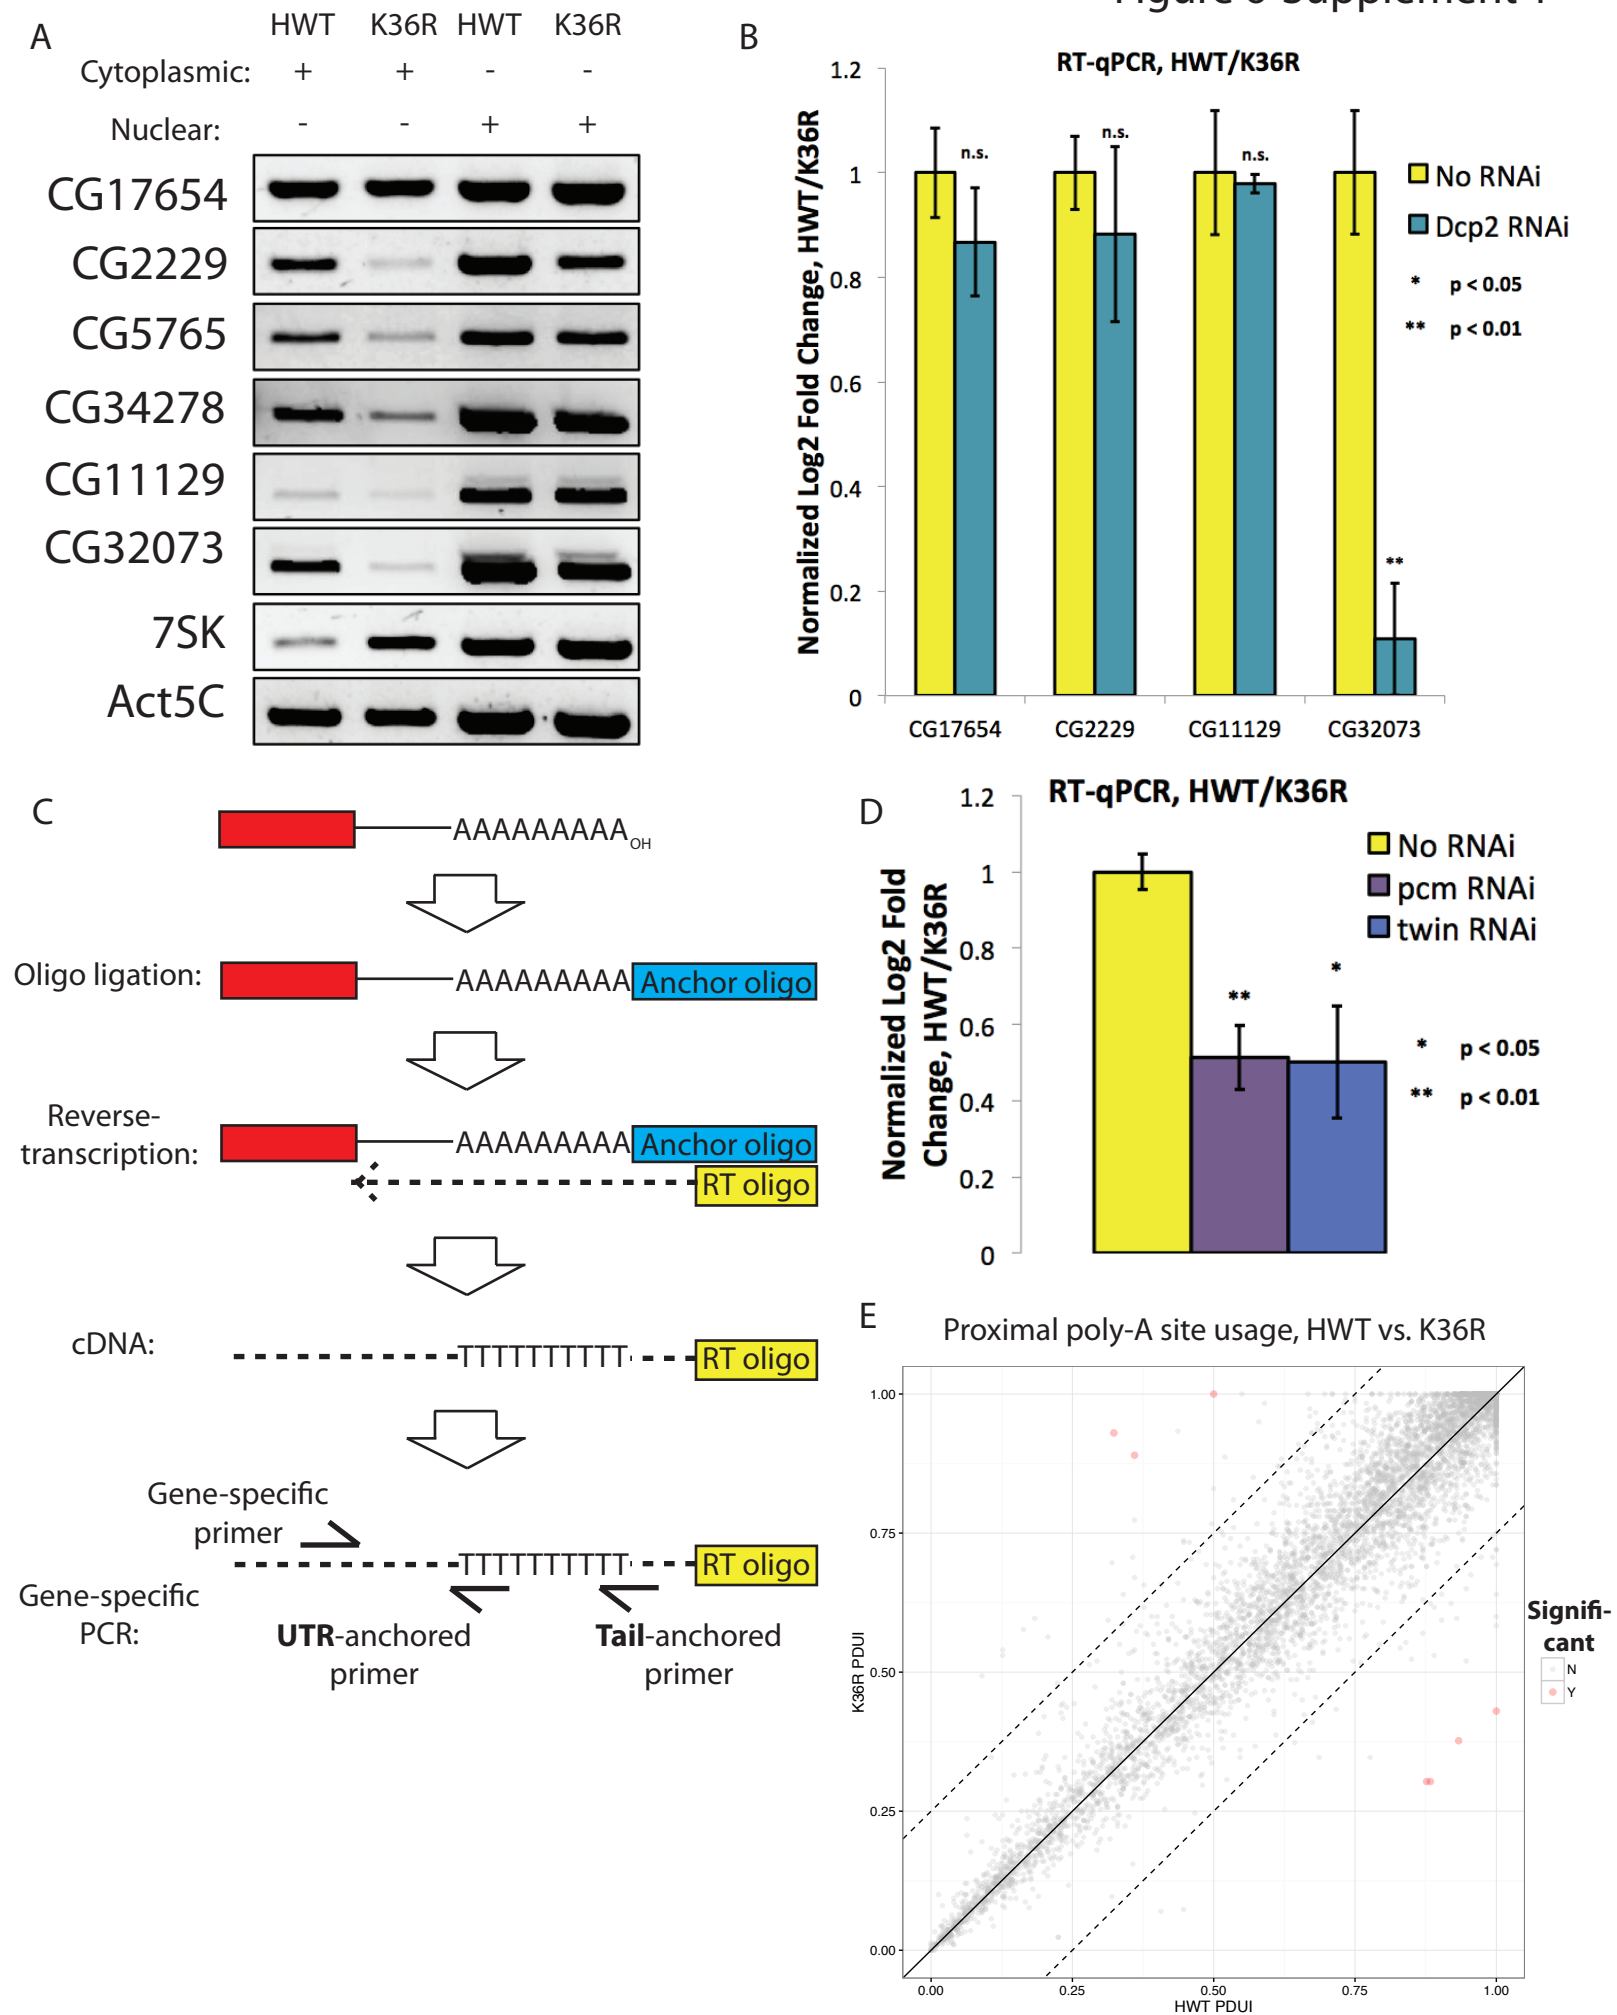

Supplement: supp [file elife-23249-supp-v1.zip]

Figure 3-Supplement 2

A

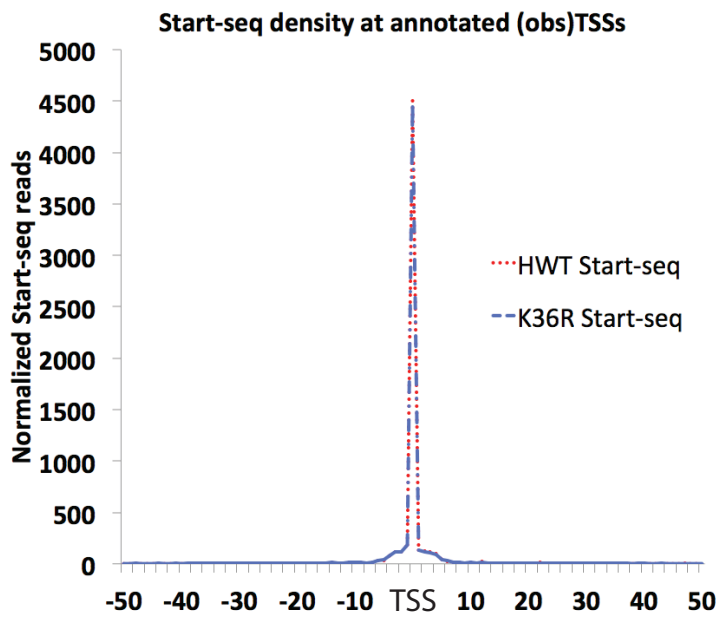

B

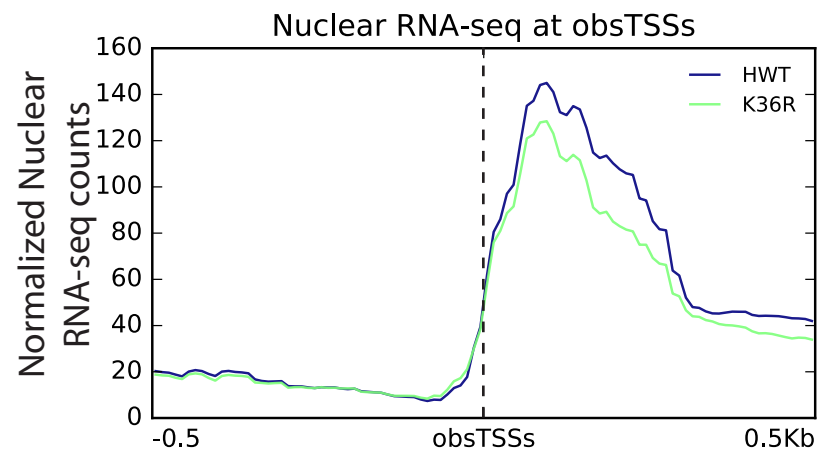

C

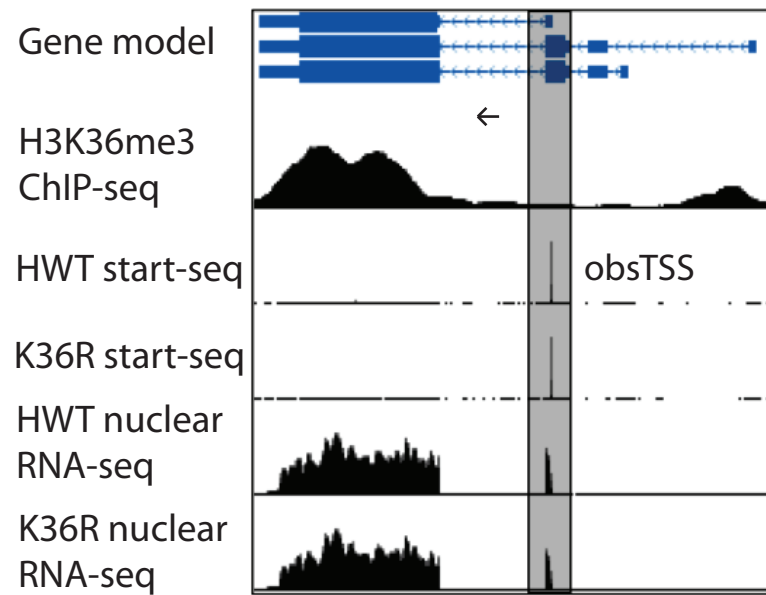

D

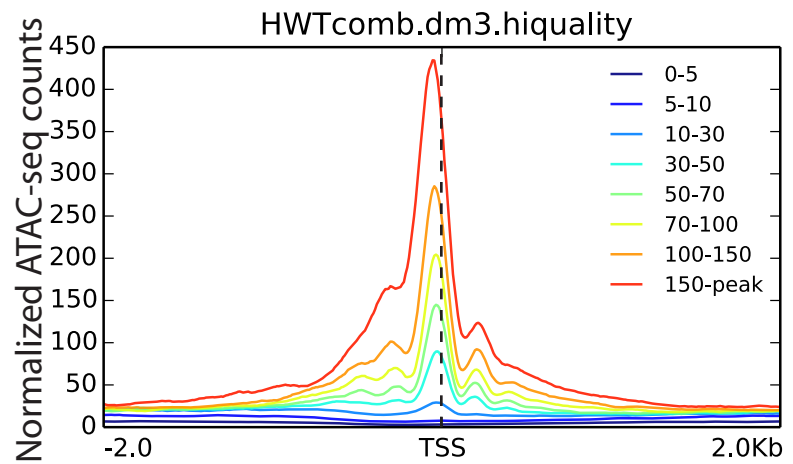

Supplement: supp [file elife-23249-supp-v1.zip]

# Figure 2-Supplement 1

A

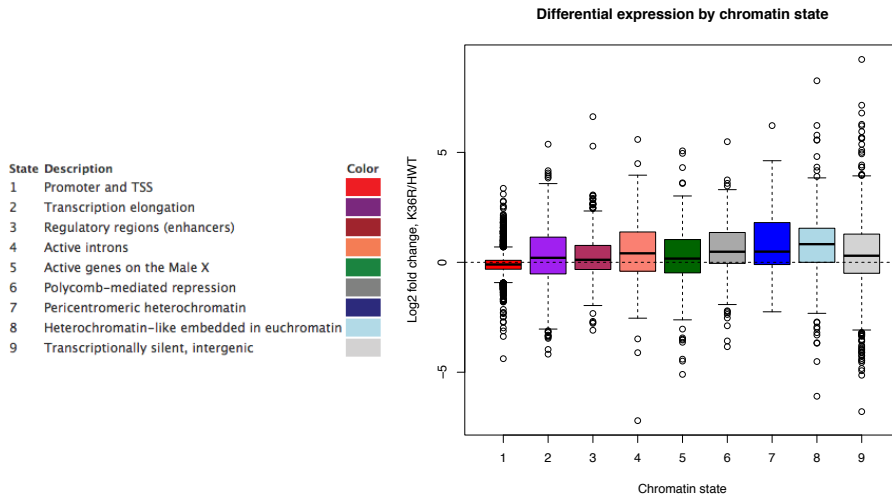

B

**Histogram of wild-type expression level**

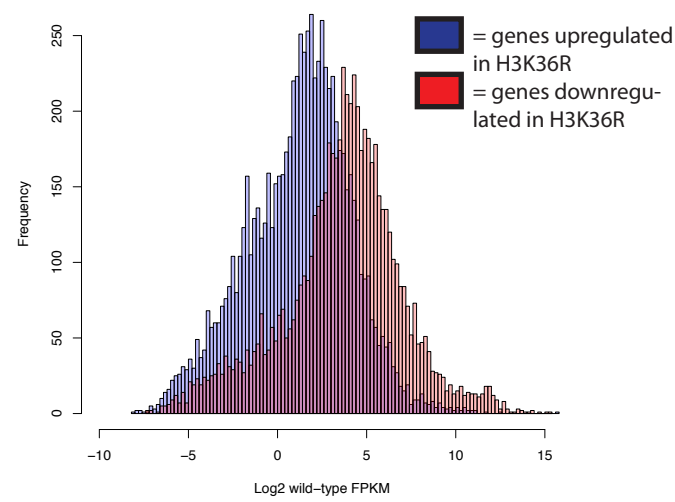

C

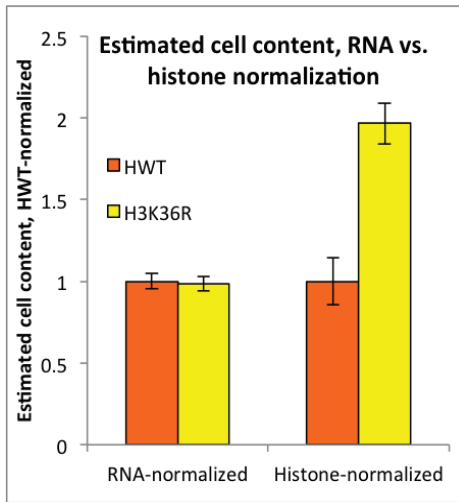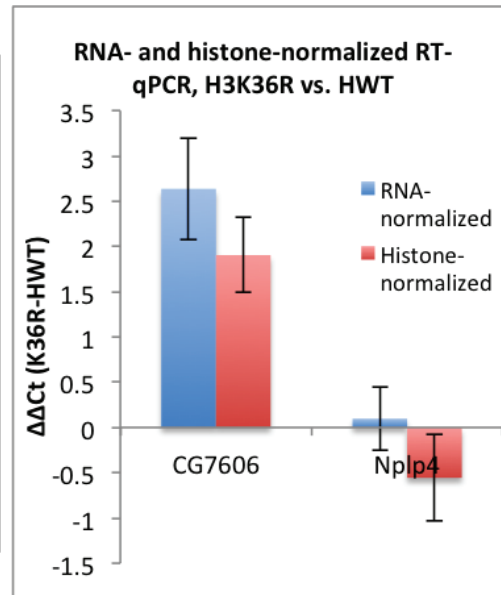

Supplement: supp [file elife-23249-supp-v1.zip]

Figure 3-Supplement 1

A

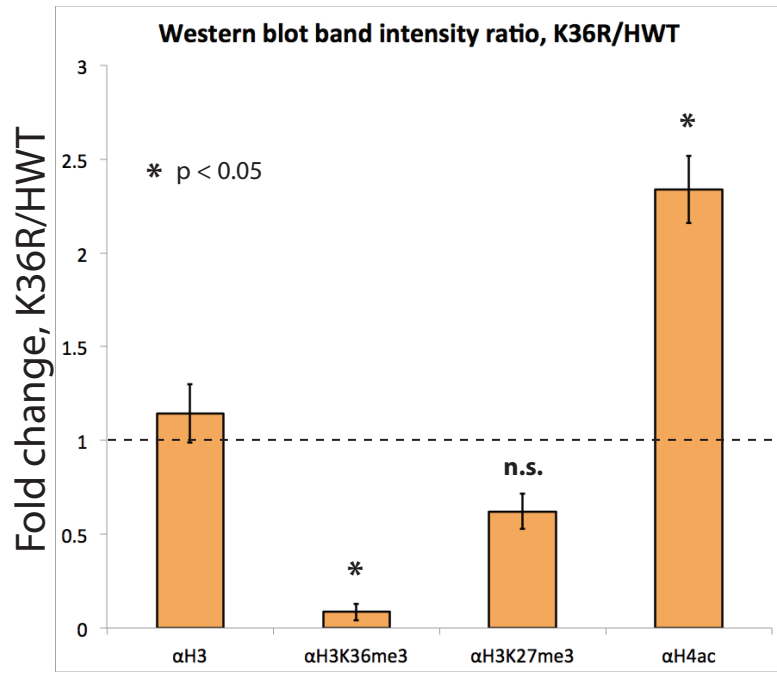

B

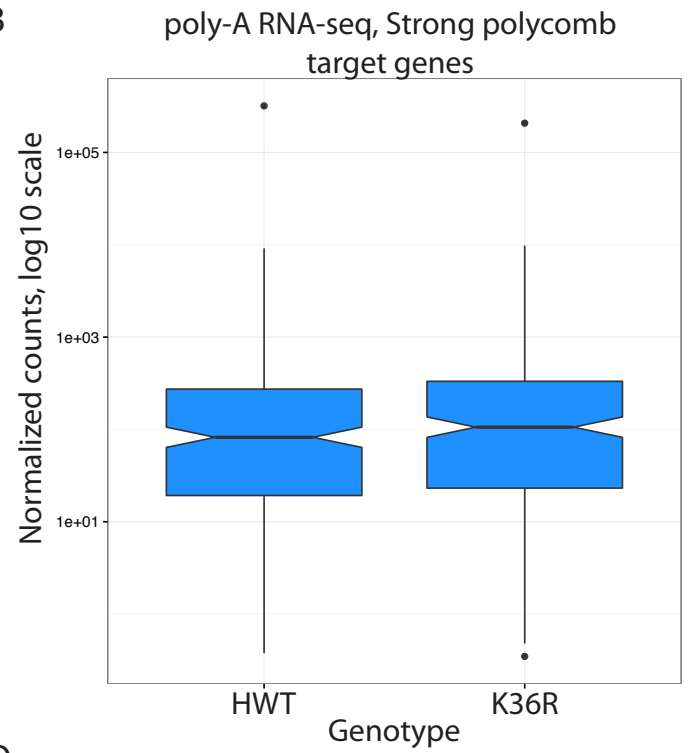

C

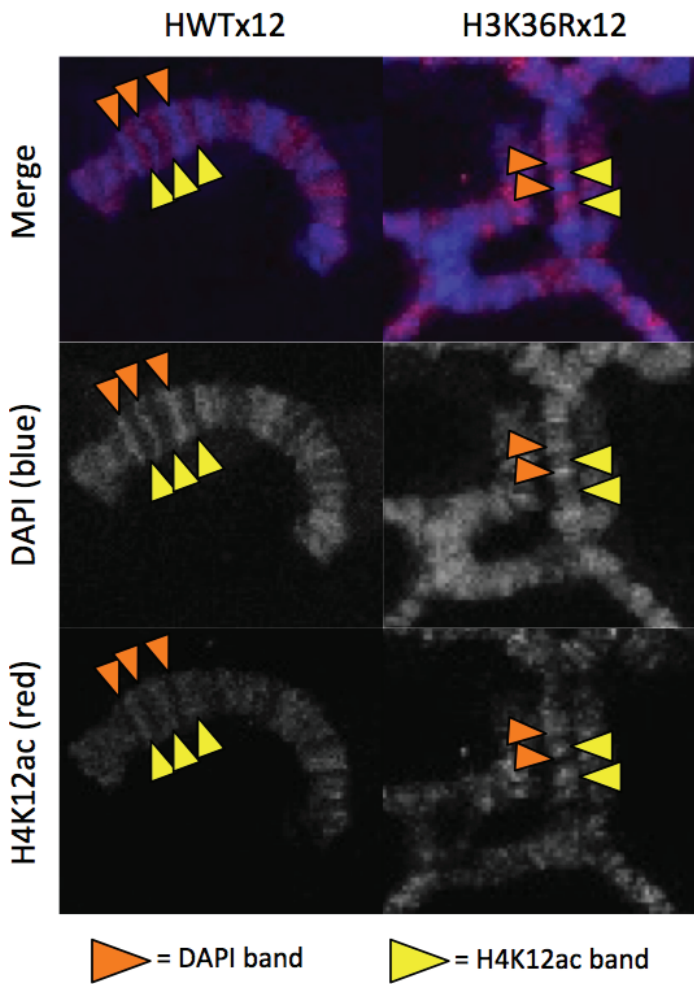

D

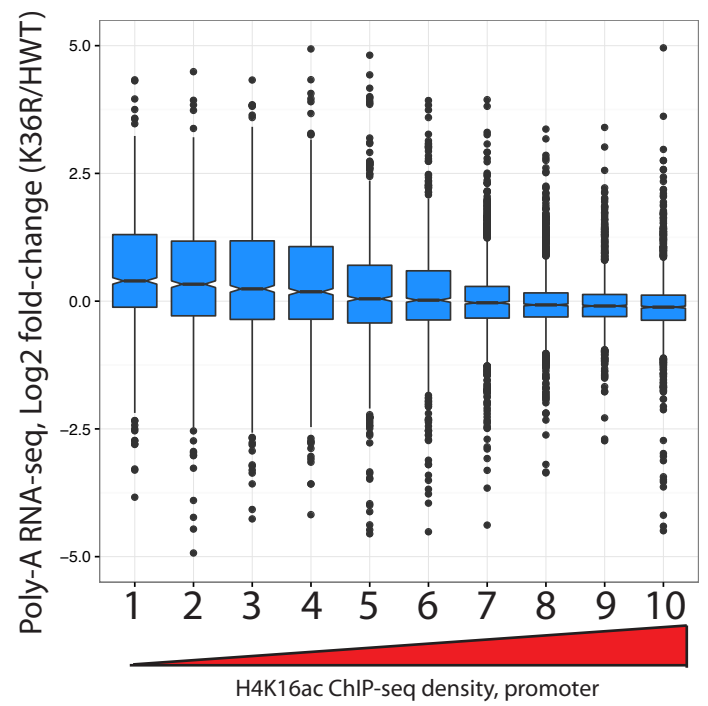

Supplement: supp [file elife-23249-supp-v1.zip › elife_poa_e23249_'Figure_3_Supplement_1'.pdf]
